# Supplementary material for: Gene expression profiles following active HE4 stimulation in epithelial ovarian cancer cells: microarray study and comprehensive bioinformatics analysis
Source: Research Square preprint supplement (doi:10.21203/rs.3.rs-100248/v1), 2020-11-04
Supplement: Supplementary file 1 [file f63849bd3f0ac786ebff4ef7.xlsx]

## Sheet: gsea_report_for_S4_159020590258
NAME	GS<br> follow link to MSigDB	GS DETAILS	SIZE	ES	NES	NOM p-val	FDR q-val	FWER p-val	RANK AT MAX	LEADING EDGE
GO_MAP_KINASE_KINASE_KINASE_ACTIVITY	GO_MAP_KINASE_KINASE_KINASE_ACTIVITY	Details ...	22	0.588829	2.16601	0	0.232532	0.144	1535	tags=41%, list=8%, signal=44%
GO_CARBOHYDRATE_KINASE_ACTIVITY	GO_CARBOHYDRATE_KINASE_ACTIVITY	Details ...	20	0.60379	2.13149	0	0.151786	0.185	2209	tags=35%, list=11%, signal=39%
GO_INCLUSION_BODY_ASSEMBLY	GO_INCLUSION_BODY_ASSEMBLY	Details ...	22	0.577428	2.08049	0	0.162988	0.277	1019	tags=36%, list=5%, signal=38%
GO_GLYCOLYTIC_PROCESS_THROUGH_FRUCTOSE_6_PHOSPHATE	GO_GLYCOLYTIC_PROCESS_THROUGH_FRUCTOSE_6_PHOSPHATE	Details ...	28	0.500711	1.9431	0	0.210527	0.635	2209	tags=39%, list=11%, signal=44%
GO_CARBOHYDRATE_PHOSPHORYLATION	GO_CARBOHYDRATE_PHOSPHORYLATION	Details ...	21	0.539783	1.91967	0	0.222489	0.7	1437	tags=19%, list=7%, signal=21%
GO_AGGRESOME	GO_AGGRESOME	Details ...	37	0.446192	1.88954	0	0.254109	0.791	1644	tags=27%, list=8%, signal=29%
GO_PURINE_NUCLEOSIDE_MONOPHOSPHATE_BIOSYNTHETIC_PROCESS	GO_PURINE_NUCLEOSIDE_MONOPHOSPHATE_BIOSYNTHETIC_PROCESS	Details ...	18	0.540675	1.85455	0	0.288717	0.859	4076	tags=56%, list=21%, signal=70%
GO_IRE1_MEDIATED_UNFOLDED_PROTEIN_RESPONSE	GO_IRE1_MEDIATED_UNFOLDED_PROTEIN_RESPONSE	Details ...	58	0.409671	1.83377	0	0.27833	0.901	3428	tags=47%, list=17%, signal=56%
GO_RIBONUCLEOSIDE_TRIPHOSPHATE_BIOSYNTHETIC_PROCESS	GO_RIBONUCLEOSIDE_TRIPHOSPHATE_BIOSYNTHETIC_PROCESS	Details ...	43	0.425558	1.83133	0	0.260983	0.906	2636	tags=30%, list=13%, signal=35%
GO_PROTEIN_SERINE_THREONINE_TYROSINE_KINASE_ACTIVITY	GO_PROTEIN_SERINE_THREONINE_TYROSINE_KINASE_ACTIVITY	Details ...	44	0.422537	1.8268	0	0.250395	0.914	3015	tags=48%, list=15%, signal=56%
GO_APOLIPOPROTEIN_BINDING	GO_APOLIPOPROTEIN_BINDING	Details ...	16	0.559376	1.82462	0	0.236917	0.917	2475	tags=44%, list=12%, signal=50%
GO_REGULATION_OF_INCLUSION_BODY_ASSEMBLY	GO_REGULATION_OF_INCLUSION_BODY_ASSEMBLY	Details ...	16	0.552176	1.81148	0	0.230173	0.935	749	tags=38%, list=4%, signal=39%
GO_TAU_PROTEIN_BINDING	GO_TAU_PROTEIN_BINDING	Details ...	45	0.402453	1.75243	0	0.301204	0.976	1589	tags=29%, list=8%, signal=31%
GO_MITOPHAGY	GO_MITOPHAGY		20	0.491757	1.73894	0	0.300543	0.979	3207	tags=50%, list=16%, signal=60%
GO_REGULATION_OF_HISTONE_DEACETYLATION	GO_REGULATION_OF_HISTONE_DEACETYLATION		27	0.440867	1.71716	0	0.306687	0.99	2299	tags=30%, list=12%, signal=33%
GO_REGULATION_OF_MICROTUBULE_POLYMERIZATION	GO_REGULATION_OF_MICROTUBULE_POLYMERIZATION		48	0.359254	1.70667	0	0.294595	0.994	2720	tags=31%, list=14%, signal=36%
GO_REGULATION_OF_PROTEIN_TARGETING	GO_REGULATION_OF_PROTEIN_TARGETING		71	0.352507	1.68647	0	0.303912	0.998	4016	tags=45%, list=20%, signal=56%
GO_AORTA_DEVELOPMENT	GO_AORTA_DEVELOPMENT		54	0.374504	1.66798	0	0.305763	0.999	3016	tags=43%, list=15%, signal=50%
GO_REGULATION_OF_MICROTUBULE_POLYMERIZATION_OR_DEPOLYMERIZATION	GO_REGULATION_OF_MICROTUBULE_POLYMERIZATION_OR_DEPOLYMERIZATION		77	0.340144	1.62893	0	0.336026	1	2720	tags=30%, list=14%, signal=34%
GO_ENDOCYTIC_RECYCLING	GO_ENDOCYTIC_RECYCLING		41	0.373086	1.59402	0	0.367729	1	2202	tags=34%, list=11%, signal=38%
GO_RESPONSE_TO_CAMP	GO_RESPONSE_TO_CAMP		95	0.304155	1.56632	0	0.389883	1	1632	tags=20%, list=8%, signal=22%
GO_FILOPODIUM	GO_FILOPODIUM		99	0.308628	1.55642	0	0.384338	1	2447	tags=26%, list=12%, signal=30%
GO_CELLULAR_RESPONSE_TO_TOPOLOGICALLY_INCORRECT_PROTEIN	GO_CELLULAR_RESPONSE_TO_TOPOLOGICALLY_INCORRECT_PROTEIN		148	0.280564	1.54081	0	0.388479	1	2839	tags=32%, list=14%, signal=37%
GO_SMALL_GTPASE_BINDING	GO_SMALL_GTPASE_BINDING		411	0.211061	1.52559	0	0.399834	1	2721	tags=24%, list=14%, signal=27%
GO_REGULATION_OF_SODIUM_ION_TRANSPORT	GO_REGULATION_OF_SODIUM_ION_TRANSPORT		83	0.30538	1.46801	0	0.43964	1	2597	tags=28%, list=13%, signal=32%
GO_RESPONSE_TO_TOPOLOGICALLY_INCORRECT_PROTEIN	GO_RESPONSE_TO_TOPOLOGICALLY_INCORRECT_PROTEIN		186	0.257057	1.44413	0	0.461142	1	3428	tags=34%, list=17%, signal=41%
GO_LYSOSOMAL_LUMEN	GO_LYSOSOMAL_LUMEN		91	0.289247	1.4371	0	0.470414	1	3258	tags=32%, list=16%, signal=38%
GO_MICROTUBULE_POLYMERIZATION_OR_DEPOLYMERIZATION	GO_MICROTUBULE_POLYMERIZATION_OR_DEPOLYMERIZATION		110	0.272379	1.38006	0	0.488638	1	3411	tags=33%, list=17%, signal=39%
GO_RAB_GTPASE_BINDING	GO_RAB_GTPASE_BINDING		156	0.25325	1.35058	0	0.524723	1	2317	tags=26%, list=12%, signal=30%
GO_MICROTUBULE_POLYMERIZATION	GO_MICROTUBULE_POLYMERIZATION		73	0.270542	1.33327	0	0.518818	1	2961	tags=27%, list=15%, signal=32%
GO_RESPONSE_TO_ORGANOPHOSPHORUS	GO_RESPONSE_TO_ORGANOPHOSPHORUS		134	0.243701	1.30498	0	0.499047	1	1732	tags=16%, list=9%, signal=18%
GO_POSITIVE_REGULATION_OF_APOPTOTIC_SIGNALING_PATHWAY	GO_POSITIVE_REGULATION_OF_APOPTOTIC_SIGNALING_PATHWAY		167	0.223144	1.28203	0	0.51854	1	2660	tags=27%, list=13%, signal=31%
GO_UBIQUITIN_LIKE_PROTEIN_LIGASE_BINDING	GO_UBIQUITIN_LIKE_PROTEIN_LIGASE_BINDING		294	0.213294	1.27341	0	0.521185	1	2307	tags=21%, list=12%, signal=23%
GO_COENZYME_BINDING	GO_COENZYME_BINDING		268	0.218763	1.26814	0	0.523334	1	3282	tags=28%, list=17%, signal=34%
GO_REGULATION_OF_ENDOCYTOSIS	GO_REGULATION_OF_ENDOCYTOSIS		198	0.214733	1.2587	0	0.53496	1	2197	tags=21%, list=11%, signal=24%
GO_RIBOSE_PHOSPHATE_BIOSYNTHETIC_PROCESS	GO_RIBOSE_PHOSPHATE_BIOSYNTHETIC_PROCESS		159	0.226836	1.24738	0	0.544814	1	2636	tags=24%, list=13%, signal=27%
GO_INSULIN_RECEPTOR_SIGNALING_PATHWAY	GO_INSULIN_RECEPTOR_SIGNALING_PATHWAY		133	0.231239	1.2369	0	0.555725	1	2605	tags=23%, list=13%, signal=26%
GO_REGULATION_OF_SMALL_GTPASE_MEDIATED_SIGNAL_TRANSDUCTION	GO_REGULATION_OF_SMALL_GTPASE_MEDIATED_SIGNAL_TRANSDUCTION		328	0.194284	1.2287	0	0.560044	1	2674	tags=20%, list=13%, signal=23%
GO_REGULATION_OF_MITOCHONDRION_ORGANIZATION	GO_REGULATION_OF_MITOCHONDRION_ORGANIZATION		172	0.22587	1.21169	0	0.558547	1	2191	tags=24%, list=11%, signal=27%
GO_RHO_GTPASE_BINDING	GO_RHO_GTPASE_BINDING		170	0.226355	1.20021	0	0.568616	1	1637	tags=16%, list=8%, signal=17%
GO_PRESYNAPTIC_MEMBRANE	GO_PRESYNAPTIC_MEMBRANE		154	0.222869	1.19625	0	0.55641	1	2429	tags=19%, list=12%, signal=22%
GO_REGULATION_OF_AXONOGENESIS	GO_REGULATION_OF_AXONOGENESIS		182	0.211097	1.18621	0	0.542457	1	2201	tags=20%, list=11%, signal=23%
GO_CARBOHYDRATE_CATABOLIC_PROCESS	GO_CARBOHYDRATE_CATABOLIC_PROCESS		188	0.209698	1.18263	0	0.537015	1	3247	tags=27%, list=16%, signal=32%
GO_RESPONSE_TO_INSULIN	GO_RESPONSE_TO_INSULIN		259	0.188794	1.16796	0	0.554181	1	2481	tags=20%, list=13%, signal=22%
GO_CELLULAR_RESPONSE_TO_INSULIN_STIMULUS	GO_CELLULAR_RESPONSE_TO_INSULIN_STIMULUS		205	0.209899	1.1537	0	0.565185	1	2481	tags=20%, list=13%, signal=23%
GO_FAT_CELL_DIFFERENTIATION	GO_FAT_CELL_DIFFERENTIATION		203	0.194872	1.14154	0	0.560724	1	1732	tags=15%, list=9%, signal=17%
GO_NUCLEOSIDE_PHOSPHATE_BIOSYNTHETIC_PROCESS	GO_NUCLEOSIDE_PHOSPHATE_BIOSYNTHETIC_PROCESS		238	0.206728	1.12825	0	0.571415	1	2994	tags=24%, list=15%, signal=28%
GO_REGULATION_OF_SUPRAMOLECULAR_FIBER_ORGANIZATION	GO_REGULATION_OF_SUPRAMOLECULAR_FIBER_ORGANIZATION		320	0.183709	1.12741	0	0.570828	1	2056	tags=16%, list=10%, signal=17%
GO_PROTEIN_AUTOPHOSPHORYLATION	GO_PROTEIN_AUTOPHOSPHORYLATION		228	0.189262	1.0881	0	0.602566	1	2156	tags=18%, list=11%, signal=20%
GO_DISTAL_AXON	GO_DISTAL_AXON		280	0.181121	1.07153	0	0.617976	1	3488	tags=28%, list=18%, signal=33%
GO_APICAL_DENDRITE	GO_APICAL_DENDRITE	Details ...	15	0.621316	2.06326	0.00465116	0.138848	0.308	1839	tags=40%, list=9%, signal=44%
GO_ESTABLISHMENT_OR_MAINTENANCE_OF_MONOPOLAR_CELL_POLARITY	GO_ESTABLISHMENT_OR_MAINTENANCE_OF_MONOPOLAR_CELL_POLARITY	Details ...	20	0.480034	1.76065	0.00465116	0.297974	0.97	1839	tags=35%, list=9%, signal=39%
GO_MISFOLDED_PROTEIN_BINDING	GO_MISFOLDED_PROTEIN_BINDING	Details ...	26	0.524121	2.06256	0.00558659	0.111374	0.308	688	tags=27%, list=3%, signal=28%
GO_MICROTUBULE_NUCLEATION	GO_MICROTUBULE_NUCLEATION		26	0.422613	1.67482	0.00609756	0.308687	0.999	3827	tags=50%, list=19%, signal=62%
GO_POSITIVE_REGULATION_OF_CARTILAGE_DEVELOPMENT	GO_POSITIVE_REGULATION_OF_CARTILAGE_DEVELOPMENT		30	0.418094	1.679	0.00632911	0.309781	0.999	3611	tags=43%, list=18%, signal=53%
GO_ATP_BIOSYNTHETIC_PROCESS	GO_ATP_BIOSYNTHETIC_PROCESS	Details ...	27	0.45553	1.76206	0.00680272	0.310756	0.968	654	tags=19%, list=3%, signal=19%
GO_GLUCOSE_CATABOLIC_PROCESS	GO_GLUCOSE_CATABOLIC_PROCESS		34	0.426785	1.73225	0.008	0.290138	0.984	2209	tags=35%, list=11%, signal=40%
GO_POSITIVE_REGULATION_OF_SODIUM_ION_TRANSMEMBRANE_TRANSPORTER_ACTIVITY	GO_POSITIVE_REGULATION_OF_SODIUM_ION_TRANSMEMBRANE_TRANSPORTER_ACTIVITY	Details ...	16	0.559466	1.8487	0.00847458	0.274127	0.87	2360	tags=38%, list=12%, signal=43%
GO_REGULATION_OF_ATP_BIOSYNTHETIC_PROCESS	GO_REGULATION_OF_ATP_BIOSYNTHETIC_PROCESS	Details ...	16	0.585394	1.96537	0.00900901	0.206982	0.57	654	tags=25%, list=3%, signal=26%
GO_REGULATION_OF_MITOPHAGY	GO_REGULATION_OF_MITOPHAGY		15	0.544204	1.73891	0.00913242	0.287476	0.979	3798	tags=67%, list=19%, signal=82%
GO_POSITIVE_REGULATION_OF_HISTONE_DEACETYLATION	GO_POSITIVE_REGULATION_OF_HISTONE_DEACETYLATION		17	0.499842	1.67072	0.00943396	0.309098	0.999	1586	tags=35%, list=8%, signal=38%
GO_RESPONSE_TO_ISCHEMIA	GO_RESPONSE_TO_ISCHEMIA		46	0.340942	1.49053	0.00961539	0.420589	1	2481	tags=33%, list=13%, signal=37%
GO_PLASMA_MEMBRANE_TUBULATION	GO_PLASMA_MEMBRANE_TUBULATION		18	0.512593	1.71483	0.00990099	0.288457	0.991	2163	tags=28%, list=11%, signal=31%
GO_REGULATION_OF_SODIUM_ION_TRANSMEMBRANE_TRANSPORTER_ACTIVITY	GO_REGULATION_OF_SODIUM_ION_TRANSMEMBRANE_TRANSPORTER_ACTIVITY		51	0.322169	1.4548	0.0106383	0.447727	1	2597	tags=27%, list=13%, signal=32%
GO_REGULATION_OF_URINE_VOLUME	GO_REGULATION_OF_URINE_VOLUME	Details ...	22	0.500029	1.8137	0.0106952	0.24108	0.934	2296	tags=32%, list=12%, signal=36%
GO_NUCLEOSIDE_TRIPHOSPHATE_BIOSYNTHETIC_PROCESS	GO_NUCLEOSIDE_TRIPHOSPHATE_BIOSYNTHETIC_PROCESS		54	0.335731	1.5278	0.0107527	0.400834	1	2636	tags=24%, list=13%, signal=28%
GO_MICROVILLUS_ASSEMBLY	GO_MICROVILLUS_ASSEMBLY		15	0.488419	1.60919	0.0114504	0.348516	1	2418	tags=47%, list=12%, signal=53%
GO_MITOGEN_ACTIVATED_PROTEIN_KINASE_BINDING	GO_MITOGEN_ACTIVATED_PROTEIN_KINASE_BINDING		25	0.43815	1.6095	0.0122699	0.355719	1	3024	tags=44%, list=15%, signal=52%
GO_SYNAPTIC_MEMBRANE_ADHESION	GO_SYNAPTIC_MEMBRANE_ADHESION		28	0.434199	1.64608	0.0129032	0.324468	0.999	1234	tags=25%, list=6%, signal=27%
GO_SIGNAL_TRANSDUCTION_IN_ABSENCE_OF_LIGAND	GO_SIGNAL_TRANSDUCTION_IN_ABSENCE_OF_LIGAND		71	0.295737	1.38307	0.0133333	0.484565	1	2199	tags=28%, list=11%, signal=32%
GO_POSITIVE_REGULATION_OF_PROTEIN_TARGETING_TO_MITOCHONDRION	GO_POSITIVE_REGULATION_OF_PROTEIN_TARGETING_TO_MITOCHONDRION		31	0.433094	1.71529	0.0135135	0.298688	0.991	4016	tags=58%, list=20%, signal=73%
GO_RENAL_ABSORPTION	GO_RENAL_ABSORPTION		16	0.517839	1.66116	0.0137615	0.311196	0.999	1880	tags=38%, list=9%, signal=41%
GO_REGULATION_OF_GLIAL_CELL_MIGRATION	GO_REGULATION_OF_GLIAL_CELL_MIGRATION		15	0.509084	1.7029	0.0138249	0.292308	0.996	2990	tags=47%, list=15%, signal=55%
GO_MONOSACCHARIDE_CATABOLIC_PROCESS	GO_MONOSACCHARIDE_CATABOLIC_PROCESS		63	0.308992	1.42068	0.0140845	0.461587	1	3375	tags=35%, list=17%, signal=42%
GO_DENDRITIC_SHAFT	GO_DENDRITIC_SHAFT		35	0.392858	1.57971	0.0141844	0.378921	1	855	tags=23%, list=4%, signal=24%
GO_REGULATION_OF_AUTOPHAGY_OF_MITOCHONDRION	GO_REGULATION_OF_AUTOPHAGY_OF_MITOCHONDRION		37	0.386438	1.62072	0.0145985	0.338873	1	3798	tags=51%, list=19%, signal=63%
GO_PROTEIN_DEMETHYLATION	GO_PROTEIN_DEMETHYLATION		29	0.405209	1.63692	0.0150376	0.327722	0.999	2308	tags=31%, list=12%, signal=35%
GO_POSTSYNAPTIC_SPECIALIZATION_ASSEMBLY	GO_POSTSYNAPTIC_SPECIALIZATION_ASSEMBLY		21	0.425607	1.5391	0.0157068	0.386186	1	1234	tags=19%, list=6%, signal=20%
GO_RETROGRADE_VESICLE_MEDIATED_TRANSPORT_GOLGI_TO_ENDOPLASMIC_RETICULUM	GO_RETROGRADE_VESICLE_MEDIATED_TRANSPORT_GOLGI_TO_ENDOPLASMIC_RETICULUM		84	0.265407	1.317	0.0166667	0.50953	1	2167	tags=26%, list=11%, signal=29%
GO_NEGATIVE_REGULATION_OF_VOLTAGE_GATED_CALCIUM_CHANNEL_ACTIVITY	GO_NEGATIVE_REGULATION_OF_VOLTAGE_GATED_CALCIUM_CHANNEL_ACTIVITY		18	0.475477	1.65247	0.0183486	0.320384	0.999	1512	tags=28%, list=8%, signal=30%
GO_REGULATION_OF_PROTEIN_TARGETING_TO_MITOCHONDRION	GO_REGULATION_OF_PROTEIN_TARGETING_TO_MITOCHONDRION		41	0.376746	1.56614	0.0188679	0.382999	1	4016	tags=51%, list=20%, signal=64%
GO_POSITIVE_REGULATION_OF_TRIGLYCERIDE_METABOLIC_PROCESS	GO_POSITIVE_REGULATION_OF_TRIGLYCERIDE_METABOLIC_PROCESS		20	0.485093	1.74046	0.0194175	0.311948	0.979	3249	tags=40%, list=16%, signal=48%
GO_ACTIVATION_OF_GTPASE_ACTIVITY	GO_ACTIVATION_OF_GTPASE_ACTIVITY		83	0.268794	1.35428	0.0196078	0.521586	1	2769	tags=29%, list=14%, signal=33%
GO_SYNAPTIC_TRANSMISSION_DOPAMINERGIC	GO_SYNAPTIC_TRANSMISSION_DOPAMINERGIC		30	0.372126	1.52486	0.02	0.395489	1	3755	tags=33%, list=19%, signal=41%
GO_NEGATIVE_REGULATION_OF_MICROTUBULE_POLYMERIZATION_OR_DEPOLYMERIZATION	GO_NEGATIVE_REGULATION_OF_MICROTUBULE_POLYMERIZATION_OR_DEPOLYMERIZATION		35	0.392472	1.59048	0.0212766	0.367976	1	1984	tags=34%, list=10%, signal=38%
GO_TRANSCRIPTION_COACTIVATOR_BINDING	GO_TRANSCRIPTION_COACTIVATOR_BINDING		23	0.419411	1.58341	0.0212766	0.377634	1	1331	tags=35%, list=7%, signal=37%
GO_SHORT_CHAIN_FATTY_ACID_METABOLIC_PROCESS	GO_SHORT_CHAIN_FATTY_ACID_METABOLIC_PROCESS		16	0.493276	1.64237	0.0218341	0.323687	0.999	827	tags=25%, list=4%, signal=26%
GO_ARTERY_DEVELOPMENT	GO_ARTERY_DEVELOPMENT		87	0.301418	1.4819	0.0222222	0.431316	1	3042	tags=36%, list=15%, signal=42%
GO_STRIATED_MUSCLE_CELL_APOPTOTIC_PROCESS	GO_STRIATED_MUSCLE_CELL_APOPTOTIC_PROCESS		38	0.327201	1.42262	0.0232558	0.460923	1	2690	tags=32%, list=14%, signal=36%
GO_GLUTAMINE_METABOLIC_PROCESS	GO_GLUTAMINE_METABOLIC_PROCESS		21	0.463125	1.68779	0.0241546	0.310828	0.998	1417	tags=24%, list=7%, signal=26%
GO_MAINTENANCE_OF_PROTEIN_LOCATION	GO_MAINTENANCE_OF_PROTEIN_LOCATION		102	0.252616	1.25989	0.025	0.536658	1	1901	tags=25%, list=10%, signal=27%
GO_ACYLGLYCEROL_O_ACYLTRANSFERASE_ACTIVITY	GO_ACYLGLYCEROL_O_ACYLTRANSFERASE_ACTIVITY		19	0.449731	1.56349	0.0251256	0.375751	1	3679	tags=42%, list=19%, signal=52%
GO_REGULATION_OF_PROTEIN_TARGETING_TO_MEMBRANE	GO_REGULATION_OF_PROTEIN_TARGETING_TO_MEMBRANE		29	0.387303	1.54648	0.0272109	0.387861	1	1310	tags=24%, list=7%, signal=26%
GO_CELL_PROLIFERATION_INVOLVED_IN_HEART_MORPHOGENESIS	GO_CELL_PROLIFERATION_INVOLVED_IN_HEART_MORPHOGENESIS		17	0.466047	1.55126	0.0280374	0.382977	1	3823	tags=53%, list=19%, signal=66%
GO_CADHERIN_BINDING_INVOLVED_IN_CELL_CELL_ADHESION	GO_CADHERIN_BINDING_INVOLVED_IN_CELL_CELL_ADHESION		18	0.445495	1.5449	0.028169	0.385289	1	2820	tags=44%, list=14%, signal=52%
GO_TAU_PROTEIN_KINASE_ACTIVITY	GO_TAU_PROTEIN_KINASE_ACTIVITY		22	0.447393	1.57178	0.0285714	0.384204	1	3402	tags=45%, list=17%, signal=55%
GO_REGULATION_OF_RECEPTOR_RECYCLING	GO_REGULATION_OF_RECEPTOR_RECYCLING		23	0.417021	1.55489	0.0289017	0.381204	1	3589	tags=52%, list=18%, signal=64%
GO_MONOSACCHARIDE_BINDING	GO_MONOSACCHARIDE_BINDING		69	0.262059	1.29435	0.0298507	0.506036	1	3085	tags=28%, list=16%, signal=32%
GO_CELLULAR_RESPONSE_TO_CHOLESTEROL	GO_CELLULAR_RESPONSE_TO_CHOLESTEROL		17	0.472072	1.605	0.0301724	0.3498	1	2939	tags=41%, list=15%, signal=48%
GO_STEROID_HORMONE_BIOSYNTHETIC_PROCESS	GO_STEROID_HORMONE_BIOSYNTHETIC_PROCESS		57	0.281124	1.319	0.0309278	0.510137	1	3293	tags=30%, list=17%, signal=36%
GO_REGULATION_OF_GLUCAN_BIOSYNTHETIC_PROCESS	GO_REGULATION_OF_GLUCAN_BIOSYNTHETIC_PROCESS		27	0.385049	1.50017	0.03125	0.414224	1	3184	tags=37%, list=16%, signal=44%
GO_TRANSCRIPTION_COFACTOR_BINDING	GO_TRANSCRIPTION_COFACTOR_BINDING		42	0.315091	1.35528	0.031746	0.522441	1	1833	tags=31%, list=9%, signal=34%
GO_NEGATIVE_REGULATION_OF_MITOCHONDRION_ORGANIZATION	GO_NEGATIVE_REGULATION_OF_MITOCHONDRION_ORGANIZATION		53	0.301209	1.42455	0.0319149	0.469428	1	2373	tags=28%, list=12%, signal=32%
GO_ENAMEL_MINERALIZATION	GO_ENAMEL_MINERALIZATION		15	0.456297	1.45657	0.0324074	0.458318	1	1286	tags=27%, list=6%, signal=28%
GO_TELOMERIC_DNA_BINDING	GO_TELOMERIC_DNA_BINDING		35	0.343961	1.41011	0.0340136	0.476815	1	2400	tags=34%, list=12%, signal=39%
GO_AUTOPHAGY_OF_MITOCHONDRION	GO_AUTOPHAGY_OF_MITOCHONDRION		70	0.273775	1.32222	0.0352941	0.510479	1	3329	tags=36%, list=17%, signal=43%
GO_RIBONUCLEOSIDE_TRIPHOSPHATE_METABOLIC_PROCESS	GO_RIBONUCLEOSIDE_TRIPHOSPHATE_METABOLIC_PROCESS		56	0.288867	1.34206	0.0357143	0.518849	1	1865	tags=21%, list=9%, signal=24%
GO_RHO_GUANYL_NUCLEOTIDE_EXCHANGE_FACTOR_ACTIVITY	GO_RHO_GUANYL_NUCLEOTIDE_EXCHANGE_FACTOR_ACTIVITY		78	0.27116	1.33389	0.0363636	0.523795	1	1637	tags=17%, list=8%, signal=18%
GO_NADH_METABOLIC_PROCESS	GO_NADH_METABOLIC_PROCESS		38	0.352449	1.43692	0.037037	0.465825	1	2209	tags=29%, list=11%, signal=33%
GO_POSITIVE_REGULATION_OF_AXONOGENESIS	GO_POSITIVE_REGULATION_OF_AXONOGENESIS		87	0.262124	1.27593	0.037037	0.522172	1	2201	tags=23%, list=11%, signal=26%
GO_LATERAL_PLASMA_MEMBRANE	GO_LATERAL_PLASMA_MEMBRANE		56	0.306662	1.39494	0.0379747	0.476582	1	2202	tags=25%, list=11%, signal=28%
GO_POSITIVE_REGULATION_OF_PROTEIN_TARGETING_TO_MEMBRANE	GO_POSITIVE_REGULATION_OF_PROTEIN_TARGETING_TO_MEMBRANE		24	0.397894	1.48674	0.039604	0.424914	1	801	tags=21%, list=4%, signal=22%
GO_PROTEIN_REFOLDING	GO_PROTEIN_REFOLDING		30	0.393025	1.56438	0.0416667	0.380381	1	1590	tags=23%, list=8%, signal=25%
GO_POSITIVE_REGULATION_OF_CREB_TRANSCRIPTION_FACTOR_ACTIVITY	GO_POSITIVE_REGULATION_OF_CREB_TRANSCRIPTION_FACTOR_ACTIVITY		18	0.43476	1.47193	0.0424528	0.434757	1	2017	tags=28%, list=10%, signal=31%
GO_INCLUSION_BODY	GO_INCLUSION_BODY		76	0.243125	1.19403	0.0425532	0.555101	1	1743	tags=20%, list=9%, signal=22%
GO_REGULATION_OF_SYNAPTIC_TRANSMISSION_DOPAMINERGIC	GO_REGULATION_OF_SYNAPTIC_TRANSMISSION_DOPAMINERGIC		16	0.500689	1.62104	0.042735	0.346364	1	1005	tags=31%, list=5%, signal=33%
GO_RESPONSE_TO_ACIDIC_PH	GO_RESPONSE_TO_ACIDIC_PH		24	0.415742	1.52187	0.0434783	0.391033	1	2024	tags=29%, list=10%, signal=32%
GO_RESPONSE_TO_PURINE_CONTAINING_COMPOUND	GO_RESPONSE_TO_PURINE_CONTAINING_COMPOUND		149	0.242582	1.30902	0.0434783	0.507551	1	1732	tags=17%, list=9%, signal=18%
GO_ACTIN_FILAMENT_BUNDLE_ORGANIZATION	GO_ACTIN_FILAMENT_BUNDLE_ORGANIZATION		147	0.238584	1.30767	0.0434783	0.505436	1	2785	tags=24%, list=14%, signal=28%
GO_DEMETHYLASE_ACTIVITY	GO_DEMETHYLASE_ACTIVITY		35	0.321369	1.33659	0.0440252	0.519773	1	2308	tags=29%, list=12%, signal=32%
GO_RESPONSE_TO_MITOCHONDRIAL_DEPOLARISATION	GO_RESPONSE_TO_MITOCHONDRIAL_DEPOLARISATION		18	0.425626	1.47807	0.0441989	0.430321	1	3798	tags=50%, list=19%, signal=62%
GO_PODOSOME_ASSEMBLY	GO_PODOSOME_ASSEMBLY		19	0.434038	1.53578	0.0454545	0.388139	1	574	tags=26%, list=3%, signal=27%
GO_RESPONSE_TO_FOLLICLE_STIMULATING_HORMONE	GO_RESPONSE_TO_FOLLICLE_STIMULATING_HORMONE		16	0.456246	1.5085	0.0458716	0.405114	1	3848	tags=44%, list=19%, signal=54%
GO_POSITIVE_REGULATION_OF_PROTEIN_DEACETYLATION	GO_POSITIVE_REGULATION_OF_PROTEIN_DEACETYLATION		21	0.427996	1.51364	0.0462428	0.404776	1	1586	tags=29%, list=8%, signal=31%
GO_RESPONSE_TO_ATP	GO_RESPONSE_TO_ATP		33	0.363815	1.4495	0.0463576	0.4564	1	3054	tags=36%, list=15%, signal=43%
GO_REGULATION_OF_GLYCOGEN_METABOLIC_PROCESS	GO_REGULATION_OF_GLYCOGEN_METABOLIC_PROCESS		32	0.382156	1.45498	0.0469799	0.452374	1	3375	tags=38%, list=17%, signal=45%
GO_REGULATION_OF_HYDROGEN_PEROXIDE_METABOLIC_PROCESS	GO_REGULATION_OF_HYDROGEN_PEROXIDE_METABOLIC_PROCESS		19	0.428906	1.52192	0.0473684	0.396605	1	3154	tags=37%, list=16%, signal=44%
GO_REGULATION_OF_FIBROBLAST_GROWTH_FACTOR_RECEPTOR_SIGNALING_PATHWAY	GO_REGULATION_OF_FIBROBLAST_GROWTH_FACTOR_RECEPTOR_SIGNALING_PATHWAY		29	0.373173	1.44421	0.0478723	0.465943	1	2183	tags=31%, list=11%, signal=35%
GO_POSITIVE_REGULATION_OF_MULTICELLULAR_ORGANISM_GROWTH	GO_POSITIVE_REGULATION_OF_MULTICELLULAR_ORGANISM_GROWTH		32	0.346272	1.38745	0.0482759	0.484593	1	2530	tags=28%, list=13%, signal=32%
GO_REGULATION_OF_TRIGLYCERIDE_BIOSYNTHETIC_PROCESS	GO_REGULATION_OF_TRIGLYCERIDE_BIOSYNTHETIC_PROCESS		17	0.464513	1.57756	0.0485437	0.377203	1	3249	tags=41%, list=16%, signal=49%
GO_NUCLEOSIDE_MONOPHOSPHATE_BIOSYNTHETIC_PROCESS	GO_NUCLEOSIDE_MONOPHOSPHATE_BIOSYNTHETIC_PROCESS		41	0.312938	1.30582	0.0495868	0.499331	1	4076	tags=41%, list=21%, signal=52%
GO_NEGATIVE_REGULATION_OF_FAT_CELL_DIFFERENTIATION	GO_NEGATIVE_REGULATION_OF_FAT_CELL_DIFFERENTIATION		43	0.327601	1.36168	0.0504202	0.516239	1	3505	tags=35%, list=18%, signal=42%
GO_CELLULAR_RESPONSE_TO_ATP	GO_CELLULAR_RESPONSE_TO_ATP		18	0.425374	1.4656	0.0505051	0.440147	1	2971	tags=39%, list=15%, signal=46%
GO_NEGATIVE_REGULATION_OF_TELOMERE_MAINTENANCE_VIA_TELOMERE_LENGTHENING	GO_NEGATIVE_REGULATION_OF_TELOMERE_MAINTENANCE_VIA_TELOMERE_LENGTHENING		24	0.373108	1.42861	0.0535714	0.468302	1	1911	tags=29%, list=10%, signal=32%
GO_CGMP_BINDING	GO_CGMP_BINDING		15	0.450886	1.47911	0.0540541	0.432954	1	2739	tags=33%, list=14%, signal=39%
GO_SERINE_FAMILY_AMINO_ACID_BIOSYNTHETIC_PROCESS	GO_SERINE_FAMILY_AMINO_ACID_BIOSYNTHETIC_PROCESS		16	0.450541	1.51213	0.0542986	0.402818	1	1692	tags=31%, list=9%, signal=34%
GO_DOPAMINE_RECEPTOR_SIGNALING_PATHWAY	GO_DOPAMINE_RECEPTOR_SIGNALING_PATHWAY		43	0.283033	1.31511	0.0555556	0.508965	1	1926	tags=26%, list=10%, signal=28%
GO_CORONARY_VASCULATURE_DEVELOPMENT	GO_CORONARY_VASCULATURE_DEVELOPMENT		45	0.325219	1.38826	0.0560748	0.486283	1	2533	tags=33%, list=13%, signal=38%
GO_CELLULAR_RESPONSE_TO_PH	GO_CELLULAR_RESPONSE_TO_PH		22	0.373214	1.40444	0.0572917	0.470919	1	801	tags=23%, list=4%, signal=24%
GO_SPERM_MIDPIECE	GO_SPERM_MIDPIECE		22	0.386984	1.40925	0.0575916	0.461955	1	1891	tags=27%, list=10%, signal=30%
GO_RAC_GTPASE_BINDING	GO_RAC_GTPASE_BINDING		62	0.265857	1.24693	0.057971	0.543649	1	859	tags=16%, list=4%, signal=17%
GO_MAP_KINASE_KINASE_ACTIVITY	GO_MAP_KINASE_KINASE_ACTIVITY		17	0.452591	1.50567	0.0580357	0.406773	1	2992	tags=41%, list=15%, signal=48%
GO_PLASMA_MEMBRANE_ORGANIZATION	GO_PLASMA_MEMBRANE_ORGANIZATION		98	0.245235	1.25372	0.06	0.536489	1	2811	tags=23%, list=14%, signal=27%
GO_NEGATIVE_REGULATION_OF_CAMP_MEDIATED_SIGNALING	GO_NEGATIVE_REGULATION_OF_CAMP_MEDIATED_SIGNALING		23	0.389994	1.42451	0.0611111	0.465004	1	749	tags=17%, list=4%, signal=18%
GO_SECRETION_BY_TISSUE	GO_SECRETION_BY_TISSUE		35	0.345205	1.40249	0.0633803	0.472236	1	3068	tags=26%, list=15%, signal=30%
GO_GLIAL_CELL_DEVELOPMENT	GO_GLIAL_CELL_DEVELOPMENT		108	0.240283	1.23231	0.0638298	0.561545	1	2967	tags=27%, list=15%, signal=31%
GO_TRANSMEMBRANE_RECEPTOR_PROTEIN_SERINE_THREONINE_KINASE_BINDING	GO_TRANSMEMBRANE_RECEPTOR_PROTEIN_SERINE_THREONINE_KINASE_BINDING		15	0.438876	1.43536	0.0643777	0.464742	1	2533	tags=33%, list=13%, signal=38%
GO_CYTOPLASMIC_MRNA_PROCESSING_BODY_ASSEMBLY	GO_CYTOPLASMIC_MRNA_PROCESSING_BODY_ASSEMBLY		19	0.396209	1.39791	0.065	0.472322	1	1866	tags=42%, list=9%, signal=46%
GO_REGULATION_OF_MICROTUBULE_DEPOLYMERIZATION	GO_REGULATION_OF_MICROTUBULE_DEPOLYMERIZATION		27	0.347004	1.31563	0.0658683	0.510325	1	1984	tags=33%, list=10%, signal=37%
GO_SULFURIC_ESTER_HYDROLASE_ACTIVITY	GO_SULFURIC_ESTER_HYDROLASE_ACTIVITY		16	0.422689	1.42282	0.0660793	0.464785	1	3489	tags=38%, list=18%, signal=45%
GO_REGULATION_OF_EXTRINSIC_APOPTOTIC_SIGNALING_PATHWAY	GO_REGULATION_OF_EXTRINSIC_APOPTOTIC_SIGNALING_PATHWAY		151	0.221745	1.19942	0.0666667	0.568878	1	2533	tags=24%, list=13%, signal=27%
GO_RIBONUCLEOSIDE_MONOPHOSPHATE_BIOSYNTHETIC_PROCESS	GO_RIBONUCLEOSIDE_MONOPHOSPHATE_BIOSYNTHETIC_PROCESS		31	0.338615	1.3395	0.0671141	0.5225	1	2940	tags=35%, list=15%, signal=42%
GO_CHAPERONE_COFACTOR_DEPENDENT_PROTEIN_REFOLDING	GO_CHAPERONE_COFACTOR_DEPENDENT_PROTEIN_REFOLDING		26	0.346344	1.34622	0.0674157	0.528772	1	1191	tags=23%, list=6%, signal=25%
GO_POSITIVE_REGULATION_OF_ANTIGEN_RECEPTOR_MEDIATED_SIGNALING_PATHWAY	GO_POSITIVE_REGULATION_OF_ANTIGEN_RECEPTOR_MEDIATED_SIGNALING_PATHWAY		20	0.414273	1.47714	0.0675676	0.427212	1	2577	tags=25%, list=13%, signal=29%
GO_NAD_METABOLIC_PROCESS	GO_NAD_METABOLIC_PROCESS		47	0.311064	1.36186	0.0679612	0.519694	1	2970	tags=36%, list=15%, signal=42%
GO_CELLULAR_RESPONSE_TO_THYROID_HORMONE_STIMULUS	GO_CELLULAR_RESPONSE_TO_THYROID_HORMONE_STIMULUS		15	0.446175	1.42986	0.0683761	0.469835	1	3175	tags=40%, list=16%, signal=48%
GO_SERINE_FAMILY_AMINO_ACID_METABOLIC_PROCESS	GO_SERINE_FAMILY_AMINO_ACID_METABOLIC_PROCESS		36	0.329899	1.35695	0.0683761	0.525701	1	1692	tags=28%, list=9%, signal=30%
GO_REGULATION_OF_RESPONSE_TO_REACTIVE_OXYGEN_SPECIES	GO_REGULATION_OF_RESPONSE_TO_REACTIVE_OXYGEN_SPECIES		31	0.336162	1.33829	0.0691824	0.518575	1	1945	tags=26%, list=10%, signal=29%
GO_RAL_GTPASE_BINDING	GO_RAL_GTPASE_BINDING		15	0.468466	1.49911	0.0695652	0.410922	1	2386	tags=47%, list=12%, signal=53%
GO_OXIDOREDUCTASE_ACTIVITY_ACTING_ON_THE_CH_CH_GROUP_OF_DONORS_NAD_OR_NADP_AS_ACCEPTOR	GO_OXIDOREDUCTASE_ACTIVITY_ACTING_ON_THE_CH_CH_GROUP_OF_DONORS_NAD_OR_NADP_AS_ACCEPTOR		26	0.364945	1.39493	0.0696202	0.47259	1	2147	tags=27%, list=11%, signal=30%
GO_REGULATION_OF_CAMP_MEDIATED_SIGNALING	GO_REGULATION_OF_CAMP_MEDIATED_SIGNALING		44	0.297197	1.32121	0.0708661	0.506954	1	1770	tags=18%, list=9%, signal=20%
GO_DIACYLGLYCEROL_METABOLIC_PROCESS	GO_DIACYLGLYCEROL_METABOLIC_PROCESS		21	0.399299	1.43497	0.0714286	0.460939	1	1737	tags=29%, list=9%, signal=31%
GO_POSITIVE_REGULATION_OF_SODIUM_ION_TRANSPORT	GO_POSITIVE_REGULATION_OF_SODIUM_ION_TRANSPORT		34	0.316181	1.33166	0.0714286	0.516514	1	2535	tags=32%, list=13%, signal=37%
GO_CHLORIDE_CHANNEL_REGULATOR_ACTIVITY	GO_CHLORIDE_CHANNEL_REGULATOR_ACTIVITY		16	0.430597	1.4431	0.0723982	0.459136	1	2360	tags=38%, list=12%, signal=43%
GO_POSITIVE_REGULATION_OF_AXON_EXTENSION	GO_POSITIVE_REGULATION_OF_AXON_EXTENSION		44	0.304682	1.33071	0.0731707	0.516218	1	1268	tags=20%, list=6%, signal=22%
GO_HISTONE_DEMETHYLASE_ACTIVITY	GO_HISTONE_DEMETHYLASE_ACTIVITY		25	0.387655	1.41349	0.0736196	0.471842	1	2308	tags=32%, list=12%, signal=36%
GO_HIGH_DENSITY_LIPOPROTEIN_PARTICLE_ASSEMBLY	GO_HIGH_DENSITY_LIPOPROTEIN_PARTICLE_ASSEMBLY		15	0.430437	1.39887	0.0745098	0.473973	1	3068	tags=40%, list=15%, signal=47%
GO_REGULATION_OF_ACTIN_FILAMENT_BUNDLE_ASSEMBLY	GO_REGULATION_OF_ACTIN_FILAMENT_BUNDLE_ASSEMBLY		89	0.238232	1.18978	0.0754717	0.545218	1	3186	tags=26%, list=16%, signal=31%
GO_LAMELLIPODIUM	GO_LAMELLIPODIUM		187	0.22305	1.22482	0.0769231	0.557673	1	2482	tags=22%, list=13%, signal=25%
GO_MAP_KINASE_PHOSPHATASE_ACTIVITY	GO_MAP_KINASE_PHOSPHATASE_ACTIVITY		15	0.465533	1.45639	0.0779816	0.453572	1	2529	tags=40%, list=13%, signal=46%
GO_ENTRAINMENT_OF_CIRCADIAN_CLOCK_BY_PHOTOPERIOD	GO_ENTRAINMENT_OF_CIRCADIAN_CLOCK_BY_PHOTOPERIOD		20	0.408767	1.49791	0.078341	0.408329	1	2073	tags=35%, list=10%, signal=39%
GO_REGULATION_OF_ACTOMYOSIN_STRUCTURE_ORGANIZATION	GO_REGULATION_OF_ACTOMYOSIN_STRUCTURE_ORGANIZATION		86	0.239133	1.19018	0.0784314	0.545903	1	3186	tags=27%, list=16%, signal=32%
GO_POSITIVE_REGULATION_OF_ACTIN_FILAMENT_BUNDLE_ASSEMBLY	GO_POSITIVE_REGULATION_OF_ACTIN_FILAMENT_BUNDLE_ASSEMBLY		59	0.277975	1.27927	0.0786517	0.518205	1	2266	tags=20%, list=11%, signal=23%
GO_ACTIN_CYTOSKELETON_REORGANIZATION	GO_ACTIN_CYTOSKELETON_REORGANIZATION		98	0.238847	1.22312	0.0789474	0.558001	1	3141	tags=26%, list=16%, signal=30%
GO_RENAL_SODIUM_EXCRETION	GO_RENAL_SODIUM_EXCRETION		22	0.372293	1.37719	0.0795455	0.49248	1	2296	tags=32%, list=12%, signal=36%
GO_HISTONE_LYSINE_N_METHYLTRANSFERASE_ACTIVITY	GO_HISTONE_LYSINE_N_METHYLTRANSFERASE_ACTIVITY		35	0.296627	1.27963	0.0797101	0.522511	1	4428	tags=40%, list=22%, signal=51%
GO_NEGATIVE_REGULATION_OF_PROTEIN_BINDING	GO_NEGATIVE_REGULATION_OF_PROTEIN_BINDING		98	0.225565	1.18794	0.0810811	0.541366	1	4202	tags=38%, list=21%, signal=48%
GO_REGULATION_OF_EXTRINSIC_APOPTOTIC_SIGNALING_PATHWAY_IN_ABSENCE_OF_LIGAND	GO_REGULATION_OF_EXTRINSIC_APOPTOTIC_SIGNALING_PATHWAY_IN_ABSENCE_OF_LIGAND		46	0.300399	1.3102	0.0816327	0.512965	1	2199	tags=28%, list=11%, signal=32%
GO_SCHWANN_CELL_DIFFERENTIATION	GO_SCHWANN_CELL_DIFFERENTIATION		36	0.33557	1.36711	0.0827586	0.508683	1	2637	tags=36%, list=13%, signal=42%
GO_PROTEIN_FOLDING_CHAPERONE	GO_PROTEIN_FOLDING_CHAPERONE		25	0.373532	1.40951	0.0828402	0.465379	1	390	tags=24%, list=2%, signal=24%
GO_FUCOSYLATION	GO_FUCOSYLATION		19	0.413143	1.42607	0.0833333	0.469892	1	3966	tags=42%, list=20%, signal=53%
GO_NEGATIVE_REGULATION_OF_STRIATED_MUSCLE_CELL_APOPTOTIC_PROCESS	GO_NEGATIVE_REGULATION_OF_STRIATED_MUSCLE_CELL_APOPTOTIC_PROCESS		24	0.349263	1.33233	0.0848485	0.518196	1	2690	tags=33%, list=14%, signal=39%
GO_DNA_POLYMERASE_BINDING	GO_DNA_POLYMERASE_BINDING		16	0.433887	1.41691	0.0857143	0.466743	1	1494	tags=38%, list=8%, signal=41%
GO_SYNAPSE_MATURATION	GO_SYNAPSE_MATURATION		24	0.360627	1.32533	0.0857143	0.517741	1	3996	tags=42%, list=20%, signal=52%
GO_PROTEIN_KINASE_C_ACTIVATING_G_PROTEIN_COUPLED_RECEPTOR_SIGNALING_PATHWAY	GO_PROTEIN_KINASE_C_ACTIVATING_G_PROTEIN_COUPLED_RECEPTOR_SIGNALING_PATHWAY		27	0.33967	1.32927	0.0872483	0.513723	1	2313	tags=30%, list=12%, signal=33%
GO_NEGATIVE_REGULATION_OF_SODIUM_ION_TRANSPORT	GO_NEGATIVE_REGULATION_OF_SODIUM_ION_TRANSPORT		18	0.390913	1.38391	0.0873786	0.486049	1	2360	tags=33%, list=12%, signal=38%
GO_POSITIVE_REGULATION_OF_NUCLEOTIDE_BIOSYNTHETIC_PROCESS	GO_POSITIVE_REGULATION_OF_NUCLEOTIDE_BIOSYNTHETIC_PROCESS		21	0.369646	1.34306	0.0884956	0.526912	1	654	tags=14%, list=3%, signal=15%
GO_REGULATION_OF_MUSCLE_ADAPTATION	GO_REGULATION_OF_MUSCLE_ADAPTATION		83	0.249741	1.22497	0.0892857	0.559465	1	3634	tags=30%, list=18%, signal=37%
GO_NEGATIVE_REGULATION_OF_NUCLEOTIDE_METABOLIC_PROCESS	GO_NEGATIVE_REGULATION_OF_NUCLEOTIDE_METABOLIC_PROCESS		19	0.409392	1.4096	0.0900474	0.47372	1	2041	tags=32%, list=10%, signal=35%
GO_MICROVILLUS_ORGANIZATION	GO_MICROVILLUS_ORGANIZATION		23	0.376982	1.40099	0.0903955	0.47216	1	2418	tags=30%, list=12%, signal=35%
GO_O_ACYLTRANSFERASE_ACTIVITY	GO_O_ACYLTRANSFERASE_ACTIVITY		43	0.303765	1.32799	0.0909091	0.513561	1	2211	tags=28%, list=11%, signal=31%
GO_SELECTIVE_AUTOPHAGY	GO_SELECTIVE_AUTOPHAGY		44	0.296609	1.27005	0.0909091	0.527706	1	2909	tags=36%, list=15%, signal=43%
GO_RUFFLE	GO_RUFFLE		167	0.208863	1.15032	0.0909091	0.564932	1	3626	tags=32%, list=18%, signal=39%
GO_URETER_DEVELOPMENT	GO_URETER_DEVELOPMENT		17	0.3928	1.31276	0.0913242	0.509433	1	1331	tags=24%, list=7%, signal=25%
GO_LYSINE_ACETYLATED_HISTONE_BINDING	GO_LYSINE_ACETYLATED_HISTONE_BINDING		18	0.417485	1.40959	0.0913462	0.469442	1	4539	tags=72%, list=23%, signal=94%
GO_RESPONSE_TO_PAIN	GO_RESPONSE_TO_PAIN		30	0.330311	1.29795	0.0915493	0.506666	1	2373	tags=23%, list=12%, signal=26%
GO_BETA_TUBULIN_BINDING	GO_BETA_TUBULIN_BINDING		38	0.302669	1.29959	0.0916031	0.507952	1	964	tags=16%, list=5%, signal=17%
GO_ACTOMYOSIN	GO_ACTOMYOSIN		74	0.2434	1.19645	0.09375	0.557743	1	2676	tags=24%, list=13%, signal=28%
GO_PHOSPHATIDYLINOSITOL_3_5_BISPHOSPHATE_BINDING	GO_PHOSPHATIDYLINOSITOL_3_5_BISPHOSPHATE_BINDING		27	0.356159	1.33361	0.0952381	0.521266	1	2293	tags=33%, list=12%, signal=38%
GO_MICROVILLUS_MEMBRANE	GO_MICROVILLUS_MEMBRANE		23	0.362611	1.3477	0.0960452	0.528535	1	2741	tags=26%, list=14%, signal=30%
GO_REGULATION_OF_SODIUM_ION_TRANSMEMBRANE_TRANSPORT	GO_REGULATION_OF_SODIUM_ION_TRANSMEMBRANE_TRANSPORT		61	0.28048	1.30628	0.0963855	0.501041	1	2597	tags=26%, list=13%, signal=30%
GO_CATALYTIC_ACTIVITY_ACTING_ON_A_RRNA	GO_CATALYTIC_ACTIVITY_ACTING_ON_A_RRNA		17	0.4018	1.37659	0.0966387	0.490244	1	3050	tags=35%, list=15%, signal=42%
GO_LABYRINTHINE_LAYER_BLOOD_VESSEL_DEVELOPMENT	GO_LABYRINTHINE_LAYER_BLOOD_VESSEL_DEVELOPMENT		19	0.377226	1.34526	0.0972222	0.527913	1	1146	tags=26%, list=6%, signal=28%
GO_POSITIVE_REGULATION_OF_MRNA_CATABOLIC_PROCESS	GO_POSITIVE_REGULATION_OF_MRNA_CATABOLIC_PROCESS		44	0.291282	1.25692	0.0972222	0.535029	1	1554	tags=23%, list=8%, signal=25%
GO_POLYUBIQUITIN_MODIFICATION_DEPENDENT_PROTEIN_BINDING	GO_POLYUBIQUITIN_MODIFICATION_DEPENDENT_PROTEIN_BINDING		44	0.291011	1.2209	0.0982143	0.559946	1	2531	tags=30%, list=13%, signal=34%
GO_CYCLIC_NUCLEOTIDE_BINDING	GO_CYCLIC_NUCLEOTIDE_BINDING		36	0.31055	1.27957	0.0984848	0.520083	1	2739	tags=28%, list=14%, signal=32%
GO_REGULATION_OF_DIGESTIVE_SYSTEM_PROCESS	GO_REGULATION_OF_DIGESTIVE_SYSTEM_PROCESS		39	0.31681	1.32269	0.0992908	0.512368	1	3340	tags=33%, list=17%, signal=40%
GO_POSTSYNAPTIC_CYTOSOL	GO_POSTSYNAPTIC_CYTOSOL		18	0.373119	1.29616	0.101064	0.50656	1	3717	tags=50%, list=19%, signal=61%
GO_REGULATION_OF_EXECUTION_PHASE_OF_APOPTOSIS	GO_REGULATION_OF_EXECUTION_PHASE_OF_APOPTOSIS		29	0.35189	1.35676	0.101266	0.522139	1	2503	tags=34%, list=13%, signal=39%
GO_NEGATIVE_REGULATION_OF_MUSCLE_CELL_APOPTOTIC_PROCESS	GO_NEGATIVE_REGULATION_OF_MUSCLE_CELL_APOPTOTIC_PROCESS		35	0.308896	1.26577	0.101449	0.527236	1	1044	tags=17%, list=5%, signal=18%
GO_POSTSYNAPTIC_SPECIALIZATION_ORGANIZATION	GO_POSTSYNAPTIC_SPECIALIZATION_ORGANIZATION		34	0.298885	1.27405	0.102041	0.524619	1	1234	tags=18%, list=6%, signal=19%
GO_RESPONSE_TO_INTERLEUKIN_4	GO_RESPONSE_TO_INTERLEUKIN_4		36	0.310661	1.29072	0.103704	0.505345	1	1760	tags=19%, list=9%, signal=21%
GO_PARALLEL_FIBER_TO_PURKINJE_CELL_SYNAPSE	GO_PARALLEL_FIBER_TO_PURKINJE_CELL_SYNAPSE		16	0.399439	1.33833	0.103896	0.522001	1	572	tags=19%, list=3%, signal=19%
GO_POSITIVE_REGULATION_OF_EPIDERMAL_CELL_DIFFERENTIATION	GO_POSITIVE_REGULATION_OF_EPIDERMAL_CELL_DIFFERENTIATION		20	0.360062	1.2991	0.104545	0.506509	1	4567	tags=40%, list=23%, signal=52%
GO_NEGATIVE_REGULATION_OF_FIBROBLAST_GROWTH_FACTOR_RECEPTOR_SIGNALING_PATHWAY	GO_NEGATIVE_REGULATION_OF_FIBROBLAST_GROWTH_FACTOR_RECEPTOR_SIGNALING_PATHWAY		16	0.410724	1.34232	0.104762	0.525322	1	2183	tags=38%, list=11%, signal=42%
GO_RESPONSE_TO_PH	GO_RESPONSE_TO_PH		41	0.304957	1.31349	0.104839	0.510265	1	2024	tags=22%, list=10%, signal=24%
GO_ENDODEOXYRIBONUCLEASE_ACTIVITY_PRODUCING_5_PHOSPHOMONOESTERS	GO_ENDODEOXYRIBONUCLEASE_ACTIVITY_PRODUCING_5_PHOSPHOMONOESTERS		15	0.402415	1.32355	0.105263	0.516202	1	1159	tags=27%, list=6%, signal=28%
GO_POSITIVE_REGULATION_OF_LIPID_CATABOLIC_PROCESS	GO_POSITIVE_REGULATION_OF_LIPID_CATABOLIC_PROCESS		25	0.353957	1.33045	0.105556	0.51357	1	3408	tags=32%, list=17%, signal=39%
GO_PHOTOPERIODISM	GO_PHOTOPERIODISM		24	0.369849	1.37362	0.106145	0.494504	1	2073	tags=29%, list=10%, signal=33%
GO_REGULATION_OF_NUCLEAR_TRANSCRIBED_MRNA_CATABOLIC_PROCESS_DEADENYLATION_DEPENDENT_DECAY	GO_REGULATION_OF_NUCLEAR_TRANSCRIBED_MRNA_CATABOLIC_PROCESS_DEADENYLATION_DEPENDENT_DECAY		17	0.387261	1.32362	0.108225	0.519229	1	1530	tags=29%, list=8%, signal=32%
GO_PINOCYTOSIS	GO_PINOCYTOSIS		20	0.37266	1.30993	0.111675	0.510796	1	3068	tags=35%, list=15%, signal=41%
GO_REGULATION_OF_HEART_MORPHOGENESIS	GO_REGULATION_OF_HEART_MORPHOGENESIS		38	0.289559	1.23251	0.112782	0.563348	1	3823	tags=47%, list=19%, signal=59%
GO_REGULATION_OF_CHOLESTEROL_BIOSYNTHETIC_PROCESS	GO_REGULATION_OF_CHOLESTEROL_BIOSYNTHETIC_PROCESS		41	0.278133	1.20685	0.114035	0.563942	1	3370	tags=41%, list=17%, signal=50%
GO_NEGATIVE_REGULATION_OF_PROTEIN_CONTAINING_COMPLEX_ASSEMBLY	GO_NEGATIVE_REGULATION_OF_PROTEIN_CONTAINING_COMPLEX_ASSEMBLY		122	0.205702	1.1219	0.114286	0.577669	1	3140	tags=23%, list=16%, signal=27%
GO_NEGATIVE_REGULATION_OF_MUSCLE_HYPERTROPHY	GO_NEGATIVE_REGULATION_OF_MUSCLE_HYPERTROPHY		28	0.320998	1.23182	0.115854	0.560593	1	3330	tags=32%, list=17%, signal=39%
GO_RESPONSE_TO_MURAMYL_DIPEPTIDE	GO_RESPONSE_TO_MURAMYL_DIPEPTIDE		18	0.363831	1.25976	0.116279	0.534537	1	2369	tags=28%, list=12%, signal=32%
GO_REGULATION_OF_FATTY_ACID_OXIDATION	GO_REGULATION_OF_FATTY_ACID_OXIDATION		28	0.348607	1.34229	0.116564	0.521746	1	1865	tags=25%, list=9%, signal=28%
GO_CIRCADIAN_SLEEP_WAKE_CYCLE_SLEEP	GO_CIRCADIAN_SLEEP_WAKE_CYCLE_SLEEP		20	0.363283	1.2978	0.116751	0.504439	1	3320	tags=30%, list=17%, signal=36%
GO_NEGATIVE_REGULATION_OF_ATP_METABOLIC_PROCESS	GO_NEGATIVE_REGULATION_OF_ATP_METABOLIC_PROCESS		24	0.345968	1.29389	0.116751	0.504655	1	2373	tags=33%, list=12%, signal=38%
GO_REGULATION_OF_PROTEIN_KINASE_A_SIGNALING	GO_REGULATION_OF_PROTEIN_KINASE_A_SIGNALING		18	0.372352	1.30838	0.116883	0.506373	1	4527	tags=44%, list=23%, signal=58%
GO_NEGATIVE_REGULATION_OF_EMBRYONIC_DEVELOPMENT	GO_NEGATIVE_REGULATION_OF_EMBRYONIC_DEVELOPMENT		25	0.32995	1.28865	0.116959	0.505842	1	4498	tags=40%, list=23%, signal=52%
GO_AORTA_MORPHOGENESIS	GO_AORTA_MORPHOGENESIS		30	0.316608	1.26987	0.117647	0.52318	1	3330	tags=43%, list=17%, signal=52%
GO_T_TUBULE	GO_T_TUBULE		51	0.265445	1.19546	0.117647	0.556579	1	669	tags=14%, list=3%, signal=14%
GO_REGULATION_OF_NUCLEOTIDE_BIOSYNTHETIC_PROCESS	GO_REGULATION_OF_NUCLEOTIDE_BIOSYNTHETIC_PROCESS		39	0.291105	1.25739	0.11811	0.53624	1	654	tags=13%, list=3%, signal=13%
GO_MEMBRANE_REPOLARIZATION	GO_MEMBRANE_REPOLARIZATION		42	0.279102	1.20362	0.119266	0.564646	1	1310	tags=19%, list=7%, signal=20%
GO_ACTIVATION_OF_MAPKK_ACTIVITY	GO_ACTIVATION_OF_MAPKK_ACTIVITY		50	0.264839	1.17135	0.120482	0.554694	1	1535	tags=24%, list=8%, signal=26%
GO_REGULATION_OF_INTERLEUKIN_1_SECRETION	GO_REGULATION_OF_INTERLEUKIN_1_SECRETION		49	0.263982	1.23455	0.121495	0.55969	1	2330	tags=20%, list=12%, signal=23%
GO_RESPONSE_TO_PROGESTERONE	GO_RESPONSE_TO_PROGESTERONE		44	0.283222	1.22691	0.121495	0.558491	1	1521	tags=25%, list=8%, signal=27%
GO_FATTY_ACID_BETA_OXIDATION	GO_FATTY_ACID_BETA_OXIDATION		70	0.241016	1.1923	0.121622	0.547223	1	935	tags=16%, list=5%, signal=16%
GO_CELLULAR_RESPONSE_TO_STEROL	GO_CELLULAR_RESPONSE_TO_STEROL		21	0.400666	1.38443	0.12234	0.488616	1	2939	tags=38%, list=15%, signal=45%
GO_MAINTENANCE_OF_LOCATION_IN_CELL	GO_MAINTENANCE_OF_LOCATION_IN_CELL		89	0.230637	1.13741	0.122807	0.560508	1	2979	tags=29%, list=15%, signal=34%
GO_CELLULAR_GLUCAN_METABOLIC_PROCESS	GO_CELLULAR_GLUCAN_METABOLIC_PROCESS		69	0.245516	1.1698	0.123077	0.555686	1	3416	tags=30%, list=17%, signal=37%
GO_RESPONSE_TO_INTERLEUKIN_6	GO_RESPONSE_TO_INTERLEUKIN_6		39	0.284855	1.22088	0.12381	0.557786	1	819	tags=15%, list=4%, signal=16%
GO_REGULATION_OF_CLATHRIN_DEPENDENT_ENDOCYTOSIS	GO_REGULATION_OF_CLATHRIN_DEPENDENT_ENDOCYTOSIS		17	0.375585	1.29184	0.124324	0.50494	1	3425	tags=53%, list=17%, signal=64%
GO_POSITIVE_REGULATION_OF_GLYCOGEN_METABOLIC_PROCESS	GO_POSITIVE_REGULATION_OF_GLYCOGEN_METABOLIC_PROCESS		17	0.406411	1.34483	0.124378	0.525565	1	532	tags=18%, list=3%, signal=18%
GO_POSITIVE_REGULATION_OF_NEURON_DEATH	GO_POSITIVE_REGULATION_OF_NEURON_DEATH		93	0.230251	1.14714	0.125	0.560055	1	3255	tags=31%, list=16%, signal=37%
GO_POSITIVE_REGULATION_OF_SUPRAMOLECULAR_FIBER_ORGANIZATION	GO_POSITIVE_REGULATION_OF_SUPRAMOLECULAR_FIBER_ORGANIZATION		187	0.198691	1.11419	0.125	0.578134	1	2306	tags=18%, list=12%, signal=20%
GO_GLYCINE_METABOLIC_PROCESS	GO_GLYCINE_METABOLIC_PROCESS		15	0.397841	1.29438	0.126126	0.508607	1	1692	tags=33%, list=9%, signal=36%
GO_RESPONSE_TO_TUMOR_CELL	GO_RESPONSE_TO_TUMOR_CELL		21	0.360065	1.27727	0.126168	0.521041	1	1028	tags=24%, list=5%, signal=25%
GO_INTERLEUKIN_1_SECRETION	GO_INTERLEUKIN_1_SECRETION		57	0.251297	1.15718	0.126582	0.558492	1	2330	tags=21%, list=12%, signal=24%
GO_INHIBITORY_POSTSYNAPTIC_POTENTIAL	GO_INHIBITORY_POSTSYNAPTIC_POTENTIAL		15	0.398303	1.31822	0.12963	0.508907	1	4236	tags=53%, list=21%, signal=68%
GO_GLANDULAR_EPITHELIAL_CELL_DEVELOPMENT	GO_GLANDULAR_EPITHELIAL_CELL_DEVELOPMENT		24	0.363696	1.35134	0.131579	0.526323	1	2533	tags=33%, list=13%, signal=38%
GO_NEGATIVE_REGULATION_OF_TELOMERE_MAINTENANCE	GO_NEGATIVE_REGULATION_OF_TELOMERE_MAINTENANCE		33	0.297002	1.24401	0.131783	0.547138	1	1911	tags=27%, list=10%, signal=30%
GO_NBAF_COMPLEX	GO_NBAF_COMPLEX		15	0.394947	1.30974	0.13198	0.508358	1	2037	tags=33%, list=10%, signal=37%
GO_INTERFERON_GAMMA_SECRETION	GO_INTERFERON_GAMMA_SECRETION		20	0.368463	1.3075	0.132275	0.502912	1	2056	tags=25%, list=10%, signal=28%
GO_BETA_CATENIN_DESTRUCTION_COMPLEX_DISASSEMBLY	GO_BETA_CATENIN_DESTRUCTION_COMPLEX_DISASSEMBLY		20	0.363498	1.30105	0.132597	0.506722	1	3323	tags=40%, list=17%, signal=48%
GO_ACTIN_FILAMENT_BINDING	GO_ACTIN_FILAMENT_BINDING		181	0.210543	1.15207	0.133333	0.56475	1	3070	tags=24%, list=15%, signal=28%
GO_REGULATION_OF_POSTSYNAPTIC_DENSITY_ORGANIZATION	GO_REGULATION_OF_POSTSYNAPTIC_DENSITY_ORGANIZATION		16	0.377309	1.30722	0.134694	0.500945	1	1234	tags=19%, list=6%, signal=20%
GO_RRNA_METHYLATION	GO_RRNA_METHYLATION		19	0.371427	1.32131	0.136842	0.509695	1	3050	tags=37%, list=15%, signal=43%
GO_CLATHRIN_COATED_PIT	GO_CLATHRIN_COATED_PIT		65	0.248372	1.15849	0.1375	0.556536	1	2711	tags=29%, list=14%, signal=34%
GO_INNER_MITOCHONDRIAL_MEMBRANE_ORGANIZATION	GO_INNER_MITOCHONDRIAL_MEMBRANE_ORGANIZATION		25	0.352446	1.32304	0.137931	0.514508	1	3275	tags=44%, list=17%, signal=53%
GO_ESTABLISHMENT_OF_ENDOTHELIAL_BARRIER	GO_ESTABLISHMENT_OF_ENDOTHELIAL_BARRIER		42	0.298378	1.25005	0.138211	0.539555	1	576	tags=14%, list=3%, signal=15%
GO_REGULATION_OF_MITOCHONDRIAL_MEMBRANE_POTENTIAL	GO_REGULATION_OF_MITOCHONDRIAL_MEMBRANE_POTENTIAL		64	0.242046	1.1499	0.138462	0.564595	1	2373	tags=22%, list=12%, signal=25%
GO_REGULATION_OF_FATTY_ACID_BETA_OXIDATION	GO_REGULATION_OF_FATTY_ACID_BETA_OXIDATION		17	0.381852	1.29256	0.139918	0.505461	1	1577	tags=24%, list=8%, signal=26%
GO_RNA_POLYMERASE_II_TRANSCRIPTION_FACTOR_BINDING	GO_RNA_POLYMERASE_II_TRANSCRIPTION_FACTOR_BINDING		61	0.268838	1.20843	0.142857	0.561524	1	2923	tags=25%, list=15%, signal=29%
GO_NEGATIVE_REGULATION_OF_RESPONSE_TO_CYTOKINE_STIMULUS	GO_NEGATIVE_REGULATION_OF_RESPONSE_TO_CYTOKINE_STIMULUS		61	0.241552	1.144	0.146341	0.555247	1	1998	tags=18%, list=10%, signal=20%
GO_NEGATIVE_REGULATION_OF_TELOMERE_MAINTENANCE_VIA_TELOMERASE	GO_NEGATIVE_REGULATION_OF_TELOMERE_MAINTENANCE_VIA_TELOMERASE		18	0.360018	1.26111	0.146465	0.535868	1	1911	tags=28%, list=10%, signal=31%
GO_POSTSYNAPTIC_SPECIALIZATION_INTRACELLULAR_COMPONENT	GO_POSTSYNAPTIC_SPECIALIZATION_INTRACELLULAR_COMPONENT		22	0.336312	1.23011	0.147368	0.560771	1	804	tags=23%, list=4%, signal=24%
GO_CIRCADIAN_SLEEP_WAKE_CYCLE	GO_CIRCADIAN_SLEEP_WAKE_CYCLE		26	0.316042	1.23067	0.147541	0.56143	1	3320	tags=27%, list=17%, signal=32%
GO_RESPONSE_TO_SALT_STRESS	GO_RESPONSE_TO_SALT_STRESS		26	0.322508	1.22314	0.148352	0.560159	1	1979	tags=19%, list=10%, signal=21%
GO_POSITIVE_REGULATION_OF_RESPONSE_TO_DRUG	GO_POSITIVE_REGULATION_OF_RESPONSE_TO_DRUG		27	0.331623	1.28901	0.148571	0.507513	1	4132	tags=52%, list=21%, signal=65%
GO_POSTSYNAPSE_ASSEMBLY	GO_POSTSYNAPSE_ASSEMBLY		31	0.297192	1.21497	0.148649	0.56161	1	2439	tags=23%, list=12%, signal=26%
GO_POSITIVE_REGULATION_OF_STRESS_FIBER_ASSEMBLY	GO_POSITIVE_REGULATION_OF_STRESS_FIBER_ASSEMBLY		49	0.274117	1.2148	0.149425	0.559926	1	2637	tags=22%, list=13%, signal=26%
GO_ACTIN_FILAMENT_BASED_MOVEMENT	GO_ACTIN_FILAMENT_BASED_MOVEMENT		135	0.208228	1.07229	0.15	0.61842	1	2597	tags=19%, list=13%, signal=21%
GO_RESPONSE_TO_MUSCLE_STRETCH	GO_RESPONSE_TO_MUSCLE_STRETCH		18	0.367644	1.27399	0.150235	0.522188	1	1535	tags=17%, list=8%, signal=18%
GO_RECYCLING_ENDOSOME_MEMBRANE	GO_RECYCLING_ENDOSOME_MEMBRANE		73	0.24318	1.19332	0.150685	0.553454	1	1477	tags=18%, list=7%, signal=19%
GO_INTRA_GOLGI_VESICLE_MEDIATED_TRANSPORT	GO_INTRA_GOLGI_VESICLE_MEDIATED_TRANSPORT		31	0.302779	1.21526	0.150943	0.563017	1	2065	tags=26%, list=10%, signal=29%
GO_POSTSYNAPTIC_DENSITY_INTRACELLULAR_COMPONENT	GO_POSTSYNAPTIC_DENSITY_INTRACELLULAR_COMPONENT		18	0.361618	1.25177	0.154867	0.537254	1	804	tags=22%, list=4%, signal=23%
GO_MITOCHONDRIAL_GENOME_MAINTENANCE	GO_MITOCHONDRIAL_GENOME_MAINTENANCE		22	0.340685	1.2699	0.15493	0.525621	1	1469	tags=23%, list=7%, signal=25%
GO_MAINTENANCE_OF_PROTEIN_LOCATION_IN_CELL	GO_MAINTENANCE_OF_PROTEIN_LOCATION_IN_CELL		72	0.245839	1.22182	0.155172	0.559381	1	1901	tags=25%, list=10%, signal=28%
GO_NEGATIVE_REGULATION_OF_CYTOSOLIC_CALCIUM_ION_CONCENTRATION	GO_NEGATIVE_REGULATION_OF_CYTOSOLIC_CALCIUM_ION_CONCENTRATION		17	0.361913	1.22893	0.156098	0.561647	1	1821	tags=24%, list=9%, signal=26%
GO_NEURON_CELLULAR_HOMEOSTASIS	GO_NEURON_CELLULAR_HOMEOSTASIS		31	0.30548	1.21711	0.156716	0.564178	1	1653	tags=23%, list=8%, signal=25%
GO_REGULATION_OF_CYTOPLASMIC_TRANSPORT	GO_REGULATION_OF_CYTOPLASMIC_TRANSPORT		21	0.341641	1.23834	0.156757	0.5565	1	1514	tags=29%, list=8%, signal=31%
GO_RUFFLE_MEMBRANE	GO_RUFFLE_MEMBRANE		89	0.215653	1.1198	0.156863	0.579133	1	3556	tags=33%, list=18%, signal=40%
GO_PYRIDINE_NUCLEOTIDE_METABOLIC_PROCESS	GO_PYRIDINE_NUCLEOTIDE_METABOLIC_PROCESS		29	0.301983	1.20277	0.15894	0.565034	1	1613	tags=21%, list=8%, signal=22%
GO_REGULATION_OF_PODOSOME_ASSEMBLY	GO_REGULATION_OF_PODOSOME_ASSEMBLY		15	0.393499	1.28774	0.159292	0.505625	1	574	tags=27%, list=3%, signal=27%
GO_MONOVALENT_INORGANIC_ANION_HOMEOSTASIS	GO_MONOVALENT_INORGANIC_ANION_HOMEOSTASIS		26	0.314482	1.19903	0.159763	0.566042	1	2852	tags=23%, list=14%, signal=27%
GO_RESPONSE_TO_MISFOLDED_PROTEIN	GO_RESPONSE_TO_MISFOLDED_PROTEIN		25	0.329869	1.23929	0.16092	0.55617	1	3576	tags=40%, list=18%, signal=49%
GO_NECROTIC_CELL_DEATH	GO_NECROTIC_CELL_DEATH		45	0.282475	1.21232	0.161017	0.558995	1	1820	tags=22%, list=9%, signal=24%
GO_HEART_FORMATION	GO_HEART_FORMATION		28	0.306921	1.16842	0.161074	0.55435	1	2921	tags=43%, list=15%, signal=50%
GO_STEROL_BINDING	GO_STEROL_BINDING		55	0.247125	1.14783	0.161616	0.56267	1	2883	tags=27%, list=15%, signal=32%
GO_DETECTION_OF_TEMPERATURE_STIMULUS_INVOLVED_IN_SENSORY_PERCEPTION	GO_DETECTION_OF_TEMPERATURE_STIMULUS_INVOLVED_IN_SENSORY_PERCEPTION		16	0.381633	1.25527	0.164319	0.537121	1	1367	tags=25%, list=7%, signal=27%
GO_RECEPTOR_SERINE_THREONINE_KINASE_BINDING	GO_RECEPTOR_SERINE_THREONINE_KINASE_BINDING		20	0.347265	1.22781	0.164948	0.557986	1	3918	tags=40%, list=20%, signal=50%
GO_LABYRINTHINE_LAYER_DEVELOPMENT	GO_LABYRINTHINE_LAYER_DEVELOPMENT		46	0.264397	1.18523	0.165049	0.536484	1	1521	tags=20%, list=8%, signal=21%
GO_POSITIVE_REGULATION_OF_AUTOPHAGY	GO_POSITIVE_REGULATION_OF_AUTOPHAGY		117	0.217685	1.17761	0.166667	0.545954	1	2264	tags=24%, list=11%, signal=27%
GO_POSITIVE_REGULATION_OF_PROTEIN_POLYMERIZATION	GO_POSITIVE_REGULATION_OF_PROTEIN_POLYMERIZATION		121	0.212752	1.14903	0.166667	0.562386	1	2306	tags=18%, list=12%, signal=20%
GO_NEGATIVE_REGULATION_OF_CALCIUM_ION_TRANSPORT	GO_NEGATIVE_REGULATION_OF_CALCIUM_ION_TRANSPORT		60	0.251569	1.15044	0.168831	0.566151	1	669	tags=12%, list=3%, signal=12%
GO_RELAXATION_OF_CARDIAC_MUSCLE	GO_RELAXATION_OF_CARDIAC_MUSCLE		16	0.363141	1.24286	0.169492	0.548299	1	556	tags=13%, list=3%, signal=13%
GO_CELLULAR_POLYSACCHARIDE_CATABOLIC_PROCESS	GO_CELLULAR_POLYSACCHARIDE_CATABOLIC_PROCESS		23	0.328846	1.21815	0.170213	0.563349	1	2232	tags=26%, list=11%, signal=29%
GO_CONTRACTILE_ACTIN_FILAMENT_BUNDLE_ASSEMBLY	GO_CONTRACTILE_ACTIN_FILAMENT_BUNDLE_ASSEMBLY		91	0.238342	1.17036	0.170732	0.555772	1	3411	tags=29%, list=17%, signal=34%
GO_POSITIVE_REGULATION_OF_LAMELLIPODIUM_ASSEMBLY	GO_POSITIVE_REGULATION_OF_LAMELLIPODIUM_ASSEMBLY		19	0.361596	1.26221	0.170854	0.534749	1	2847	tags=32%, list=14%, signal=37%
GO_ARF_PROTEIN_SIGNAL_TRANSDUCTION	GO_ARF_PROTEIN_SIGNAL_TRANSDUCTION		18	0.366005	1.25271	0.171569	0.536776	1	1967	tags=28%, list=10%, signal=31%
GO_PHOSPHATIDYLINOSITOL_3_PHOSPHATE_BINDING	GO_PHOSPHATIDYLINOSITOL_3_PHOSPHATE_BINDING		37	0.27757	1.19408	0.171642	0.558774	1	2293	tags=27%, list=12%, signal=31%
GO_CYTOPLASMIC_SEQUESTERING_OF_PROTEIN	GO_CYTOPLASMIC_SEQUESTERING_OF_PROTEIN		24	0.323672	1.20967	0.171875	0.560092	1	1835	tags=29%, list=9%, signal=32%
GO_OXIDOREDUCTASE_ACTIVITY_ACTING_ON_THE_CH_NH_GROUP_OF_DONORS	GO_OXIDOREDUCTASE_ACTIVITY_ACTING_ON_THE_CH_NH_GROUP_OF_DONORS		25	0.317525	1.20198	0.172185	0.565256	1	2735	tags=28%, list=14%, signal=32%
GO_ACTIN_FILAMENT	GO_ACTIN_FILAMENT		111	0.207661	1.12925	0.172414	0.574245	1	3024	tags=26%, list=15%, signal=31%
GO_OXIDOREDUCTASE_ACTIVITY_ACTING_ON_THE_CH_NH_GROUP_OF_DONORS_NAD_OR_NADP_AS_ACCEPTOR	GO_OXIDOREDUCTASE_ACTIVITY_ACTING_ON_THE_CH_NH_GROUP_OF_DONORS_NAD_OR_NADP_AS_ACCEPTOR		16	0.379175	1.24553	0.173913	0.545052	1	2666	tags=31%, list=13%, signal=36%
GO_RECYCLING_ENDOSOME	GO_RECYCLING_ENDOSOME		152	0.193486	1.12294	0.173913	0.576127	1	2163	tags=19%, list=11%, signal=21%
GO_PURINE_NUCLEOSIDE_TRIPHOSPHATE_METABOLIC_PROCESS	GO_PURINE_NUCLEOSIDE_TRIPHOSPHATE_METABOLIC_PROCESS		58	0.252338	1.17236	0.175824	0.553518	1	2593	tags=22%, list=13%, signal=26%
GO_REGION_OF_CYTOSOL	GO_REGION_OF_CYTOSOL		25	0.322607	1.19407	0.178771	0.556877	1	3761	tags=44%, list=19%, signal=54%
GO_SPINAL_CORD_DEVELOPMENT	GO_SPINAL_CORD_DEVELOPMENT		106	0.216441	1.11839	0.179487	0.580326	1	2530	tags=19%, list=13%, signal=22%
GO_RECEPTOR_RECYCLING	GO_RECEPTOR_RECYCLING		32	0.31504	1.22794	0.179641	0.559918	1	4527	tags=50%, list=23%, signal=65%
GO_CELLULAR_CARBOHYDRATE_CATABOLIC_PROCESS	GO_CELLULAR_CARBOHYDRATE_CATABOLIC_PROCESS		41	0.279062	1.18862	0.18	0.542955	1	2498	tags=24%, list=13%, signal=28%
GO_EXCITATORY_SYNAPSE_ASSEMBLY	GO_EXCITATORY_SYNAPSE_ASSEMBLY		26	0.314917	1.18513	0.180723	0.535068	1	2948	tags=23%, list=15%, signal=27%
GO_ACTIVATION_OF_JUN_KINASE_ACTIVITY	GO_ACTIVATION_OF_JUN_KINASE_ACTIVITY		34	0.288244	1.21071	0.181159	0.55917	1	1356	tags=18%, list=7%, signal=19%
GO_HEPARAN_SULFATE_PROTEOGLYCAN_METABOLIC_PROCESS	GO_HEPARAN_SULFATE_PROTEOGLYCAN_METABOLIC_PROCESS		31	0.288046	1.18865	0.181287	0.54465	1	1301	tags=16%, list=7%, signal=17%
GO_NEGATIVE_REGULATION_OF_CELL_GROWTH	GO_NEGATIVE_REGULATION_OF_CELL_GROWTH		175	0.221291	1.18001	0.181818	0.540746	1	1797	tags=18%, list=9%, signal=19%
GO_NEGATIVE_REGULATION_OF_TYPE_I_INTERFERON_PRODUCTION	GO_NEGATIVE_REGULATION_OF_TYPE_I_INTERFERON_PRODUCTION		42	0.278198	1.19659	0.183206	0.559262	1	3187	tags=31%, list=16%, signal=37%
GO_POSITIVE_REGULATION_OF_NEUROBLAST_PROLIFERATION	GO_POSITIVE_REGULATION_OF_NEUROBLAST_PROLIFERATION		23	0.329232	1.23757	0.184358	0.556397	1	2530	tags=35%, list=13%, signal=40%
GO_ENDOPLASMIC_RETICULUM_UNFOLDED_PROTEIN_RESPONSE	GO_ENDOPLASMIC_RETICULUM_UNFOLDED_PROTEIN_RESPONSE		111	0.223359	1.16187	0.185185	0.556675	1	3428	tags=34%, list=17%, signal=41%
GO_PROTEIN_DISULFIDE_ISOMERASE_ACTIVITY	GO_PROTEIN_DISULFIDE_ISOMERASE_ACTIVITY		16	0.375795	1.21351	0.186047	0.561638	1	2743	tags=38%, list=14%, signal=43%
GO_NEGATIVE_REGULATION_OF_INNATE_IMMUNE_RESPONSE	GO_NEGATIVE_REGULATION_OF_INNATE_IMMUNE_RESPONSE		54	0.252556	1.13456	0.1875	0.563837	1	2529	tags=24%, list=13%, signal=28%
GO_CALMODULIN_DEPENDENT_PROTEIN_KINASE_ACTIVITY	GO_CALMODULIN_DEPENDENT_PROTEIN_KINASE_ACTIVITY		28	0.315963	1.19745	0.189024	0.56259	1	3416	tags=36%, list=17%, signal=43%
GO_NUCLEAR_TRANSCRIBED_MRNA_POLY_A_TAIL_SHORTENING	GO_NUCLEAR_TRANSCRIBED_MRNA_POLY_A_TAIL_SHORTENING		26	0.321844	1.19271	0.189349	0.551543	1	3499	tags=42%, list=18%, signal=51%
GO_POSITIVE_REGULATION_OF_LAMELLIPODIUM_ORGANIZATION	GO_POSITIVE_REGULATION_OF_LAMELLIPODIUM_ORGANIZATION		26	0.323856	1.20398	0.191358	0.565766	1	2041	tags=31%, list=10%, signal=34%
GO_SULFUR_COMPOUND_TRANSPORT	GO_SULFUR_COMPOUND_TRANSPORT		43	0.268895	1.16951	0.192308	0.554827	1	4069	tags=40%, list=21%, signal=50%
GO_NEUROTROPHIN_TRK_RECEPTOR_SIGNALING_PATHWAY	GO_NEUROTROPHIN_TRK_RECEPTOR_SIGNALING_PATHWAY		32	0.290011	1.16005	0.192308	0.555312	1	1810	tags=28%, list=9%, signal=31%
GO_MUSCLE_CELL_APOPTOTIC_PROCESS	GO_MUSCLE_CELL_APOPTOTIC_PROCESS		66	0.234996	1.11771	0.192308	0.577933	1	2690	tags=23%, list=14%, signal=26%
GO_VENTRICULAR_CARDIAC_MUSCLE_CELL_ACTION_POTENTIAL	GO_VENTRICULAR_CARDIAC_MUSCLE_CELL_ACTION_POTENTIAL		32	0.288951	1.1761	0.192593	0.546627	1	1732	tags=22%, list=9%, signal=24%
GO_NEGATIVE_REGULATION_OF_MACROPHAGE_ACTIVATION	GO_NEGATIVE_REGULATION_OF_MACROPHAGE_ACTIVATION		15	0.373175	1.19346	0.192661	0.554948	1	1653	tags=27%, list=8%, signal=29%
GO_COENZYME_A_METABOLIC_PROCESS	GO_COENZYME_A_METABOLIC_PROCESS		15	0.405133	1.2691	0.192913	0.522986	1	2490	tags=40%, list=13%, signal=46%
GO_NUCLEUS_LOCALIZATION	GO_NUCLEUS_LOCALIZATION		27	0.31607	1.18305	0.19375	0.539116	1	1901	tags=30%, list=10%, signal=33%
GO_HEART_FIELD_SPECIFICATION	GO_HEART_FIELD_SPECIFICATION		15	0.384987	1.25521	0.194444	0.534884	1	2921	tags=53%, list=15%, signal=63%
GO_DISORDERED_DOMAIN_SPECIFIC_BINDING	GO_DISORDERED_DOMAIN_SPECIFIC_BINDING		31	0.295068	1.18298	0.194444	0.537673	1	880	tags=16%, list=4%, signal=17%
GO_POST_EMBRYONIC_ANIMAL_ORGAN_DEVELOPMENT	GO_POST_EMBRYONIC_ANIMAL_ORGAN_DEVELOPMENT		15	0.365875	1.21577	0.195652	0.56601	1	2987	tags=27%, list=15%, signal=31%
GO_GLOMERULAR_EPITHELIUM_DEVELOPMENT	GO_GLOMERULAR_EPITHELIUM_DEVELOPMENT		22	0.336514	1.22629	0.19697	0.55805	1	3024	tags=41%, list=15%, signal=48%
GO_RAC_GUANYL_NUCLEOTIDE_EXCHANGE_FACTOR_ACTIVITY	GO_RAC_GUANYL_NUCLEOTIDE_EXCHANGE_FACTOR_ACTIVITY		17	0.352919	1.19777	0.197368	0.563694	1	855	tags=18%, list=4%, signal=18%
GO_PROTEIN_KINASE_A_SIGNALING	GO_PROTEIN_KINASE_A_SIGNALING		31	0.301322	1.19248	0.197452	0.550321	1	4175	tags=39%, list=21%, signal=49%
GO_REGULATION_OF_MEMBRANE_REPOLARIZATION	GO_REGULATION_OF_MEMBRANE_REPOLARIZATION		31	0.299136	1.18734	0.197531	0.541259	1	455	tags=19%, list=2%, signal=20%
GO_CHROMATIN_DISASSEMBLY	GO_CHROMATIN_DISASSEMBLY		19	0.336048	1.19907	0.197917	0.567945	1	1324	tags=32%, list=7%, signal=34%
GO_NEGATIVE_REGULATION_OF_GTPASE_ACTIVITY	GO_NEGATIVE_REGULATION_OF_GTPASE_ACTIVITY		46	0.258364	1.1529	0.198113	0.565673	1	3945	tags=33%, list=20%, signal=41%
GO_PLACENTA_BLOOD_VESSEL_DEVELOPMENT	GO_PLACENTA_BLOOD_VESSEL_DEVELOPMENT		30	0.296522	1.18603	0.198758	0.539439	1	1146	tags=20%, list=6%, signal=21%
GO_VACUOLAR_LUMEN	GO_VACUOLAR_LUMEN		160	0.210569	1.17575	0.2	0.54594	1	3258	tags=27%, list=16%, signal=32%
GO_OXIDOREDUCTASE_ACTIVITY_ACTING_ON_THE_CH_CH_GROUP_OF_DONORS	GO_OXIDOREDUCTASE_ACTIVITY_ACTING_ON_THE_CH_CH_GROUP_OF_DONORS		56	0.261272	1.16135	0.2	0.556492	1	2147	tags=25%, list=11%, signal=28%
GO_GLIAL_CELL_DIFFERENTIATION	GO_GLIAL_CELL_DIFFERENTIATION		209	0.194155	1.09081	0.2	0.601901	1	2690	tags=22%, list=14%, signal=25%
GO_REGULATION_OF_RAS_PROTEIN_SIGNAL_TRANSDUCTION	GO_REGULATION_OF_RAS_PROTEIN_SIGNAL_TRANSDUCTION		231	0.19174	1.07949	0.2	0.61361	1	2441	tags=18%, list=12%, signal=20%
GO_NUCLEOID	GO_NUCLEOID		37	0.274368	1.15633	0.202899	0.559214	1	2771	tags=30%, list=14%, signal=34%
GO_POSITIVE_REGULATION_OF_SODIUM_ION_TRANSMEMBRANE_TRANSPORT	GO_POSITIVE_REGULATION_OF_SODIUM_ION_TRANSMEMBRANE_TRANSPORT		21	0.347206	1.1972	0.203488	0.559313	1	2360	tags=29%, list=12%, signal=32%
GO_POSITIVE_REGULATION_OF_ERYTHROCYTE_DIFFERENTIATION	GO_POSITIVE_REGULATION_OF_ERYTHROCYTE_DIFFERENTIATION		28	0.294614	1.14891	0.203488	0.561168	1	2786	tags=32%, list=14%, signal=37%
GO_SCHWANN_CELL_DEVELOPMENT	GO_SCHWANN_CELL_DEVELOPMENT		28	0.313194	1.18595	0.204819	0.537957	1	2637	tags=36%, list=13%, signal=41%
GO_SENSORY_PERCEPTION_OF_TEMPERATURE_STIMULUS	GO_SENSORY_PERCEPTION_OF_TEMPERATURE_STIMULUS		21	0.320019	1.18592	0.205263	0.536344	1	1452	tags=24%, list=7%, signal=26%
GO_DOPAMINE_RECEPTOR_BINDING	GO_DOPAMINE_RECEPTOR_BINDING		17	0.342174	1.19153	0.205742	0.547603	1	2982	tags=35%, list=15%, signal=42%
GO_REGULATION_OF_MICROTUBULE_BASED_MOVEMENT	GO_REGULATION_OF_MICROTUBULE_BASED_MOVEMENT		26	0.313751	1.20519	0.206186	0.566438	1	1529	tags=19%, list=8%, signal=21%
GO_PROTEIN_QUALITY_CONTROL_FOR_MISFOLDED_OR_INCOMPLETELY_SYNTHESIZED_PROTEINS	GO_PROTEIN_QUALITY_CONTROL_FOR_MISFOLDED_OR_INCOMPLETELY_SYNTHESIZED_PROTEINS		28	0.30837	1.19294	0.206667	0.55269	1	2274	tags=29%, list=11%, signal=32%
GO_DETECTION_OF_TEMPERATURE_STIMULUS	GO_DETECTION_OF_TEMPERATURE_STIMULUS		20	0.330244	1.16439	0.206704	0.5528	1	1367	tags=20%, list=7%, signal=21%
GO_GASTRIC_ACID_SECRETION	GO_GASTRIC_ACID_SECRETION		19	0.341943	1.16894	0.207373	0.554655	1	1451	tags=21%, list=7%, signal=23%
GO_CARDIAC_MUSCLE_CELL_ACTION_POTENTIAL_INVOLVED_IN_CONTRACTION	GO_CARDIAC_MUSCLE_CELL_ACTION_POTENTIAL_INVOLVED_IN_CONTRACTION		49	0.264142	1.13911	0.209091	0.561462	1	1732	tags=18%, list=9%, signal=20%
GO_LAMELLIPODIUM_ORGANIZATION	GO_LAMELLIPODIUM_ORGANIZATION		72	0.227703	1.10869	0.209302	0.581092	1	2260	tags=21%, list=11%, signal=23%
GO_GERM_CELL_NUCLEUS	GO_GERM_CELL_NUCLEUS		16	0.365884	1.21321	0.210526	0.56042	1	2334	tags=31%, list=12%, signal=35%
GO_REGULATION_OF_PROTEIN_DEACETYLATION	GO_REGULATION_OF_PROTEIN_DEACETYLATION		41	0.26166	1.12104	0.211009	0.578649	1	1586	tags=20%, list=8%, signal=21%
GO_MITOTIC_SISTER_CHROMATID_COHESION	GO_MITOTIC_SISTER_CHROMATID_COHESION		18	0.348115	1.20514	0.212435	0.564551	1	1525	tags=28%, list=8%, signal=30%
GO_REPRESSING_TRANSCRIPTION_FACTOR_BINDING	GO_REPRESSING_TRANSCRIPTION_FACTOR_BINDING		70	0.229572	1.11291	0.213115	0.574824	1	3474	tags=31%, list=18%, signal=38%
GO_REGULATION_OF_PRESYNAPSE_ORGANIZATION	GO_REGULATION_OF_PRESYNAPSE_ORGANIZATION		32	0.273899	1.11666	0.213235	0.576774	1	1234	tags=16%, list=6%, signal=17%
GO_POSITIVE_REGULATION_OF_CELLULAR_RESPONSE_TO_INSULIN_STIMULUS	GO_POSITIVE_REGULATION_OF_CELLULAR_RESPONSE_TO_INSULIN_STIMULUS		23	0.333186	1.21576	0.214286	0.563836	1	574	tags=17%, list=3%, signal=18%
GO_GLYCOLIPID_CATABOLIC_PROCESS	GO_GLYCOLIPID_CATABOLIC_PROCESS		16	0.361058	1.18196	0.21645	0.537184	1	2777	tags=31%, list=14%, signal=36%
GO_TYPE_B_PANCREATIC_CELL_PROLIFERATION	GO_TYPE_B_PANCREATIC_CELL_PROLIFERATION		20	0.339765	1.1906	0.216749	0.548379	1	4164	tags=35%, list=21%, signal=44%
GO_VOLTAGE_GATED_SODIUM_CHANNEL_ACTIVITY	GO_VOLTAGE_GATED_SODIUM_CHANNEL_ACTIVITY		23	0.309367	1.16127	0.217143	0.555033	1	1273	tags=17%, list=6%, signal=19%
GO_PYRIDINE_CONTAINING_COMPOUND_METABOLIC_PROCESS	GO_PYRIDINE_CONTAINING_COMPOUND_METABOLIC_PROCESS		35	0.278203	1.13863	0.21831	0.561394	1	1613	tags=20%, list=8%, signal=22%
GO_VENTRICULAR_CARDIAC_MUSCLE_CELL_MEMBRANE_REPOLARIZATION	GO_VENTRICULAR_CARDIAC_MUSCLE_CELL_MEMBRANE_REPOLARIZATION		24	0.319617	1.18946	0.218579	0.544287	1	1310	tags=25%, list=7%, signal=27%
GO_POSITIVE_REGULATION_OF_NEURON_APOPTOTIC_PROCESS	GO_POSITIVE_REGULATION_OF_NEURON_APOPTOTIC_PROCESS		56	0.242909	1.10977	0.21875	0.579673	1	3187	tags=30%, list=16%, signal=36%
GO_SULFUR_AMINO_ACID_CATABOLIC_PROCESS	GO_SULFUR_AMINO_ACID_CATABOLIC_PROCESS		15	0.370615	1.19741	0.219512	0.560735	1	610	tags=27%, list=3%, signal=27%
GO_PEPTIDYL_THREONINE_DEPHOSPHORYLATION	GO_PEPTIDYL_THREONINE_DEPHOSPHORYLATION		16	0.351495	1.18606	0.221719	0.541095	1	2529	tags=38%, list=13%, signal=43%
GO_PROGRAMMED_NECROTIC_CELL_DEATH	GO_PROGRAMMED_NECROTIC_CELL_DEATH		39	0.276576	1.14483	0.222222	0.554342	1	1820	tags=23%, list=9%, signal=25%
GO_NEGATIVE_REGULATION_OF_ENDOCYTOSIS	GO_NEGATIVE_REGULATION_OF_ENDOCYTOSIS		42	0.256292	1.12048	0.223881	0.578748	1	3557	tags=36%, list=18%, signal=43%
GO_PYRIMIDINE_RIBONUCLEOSIDE_TRIPHOSPHATE_METABOLIC_PROCESS	GO_PYRIMIDINE_RIBONUCLEOSIDE_TRIPHOSPHATE_METABOLIC_PROCESS		15	0.33923	1.14717	0.225108	0.561502	1	2636	tags=33%, list=13%, signal=38%
GO_CELLULAR_RESPONSE_TO_CAMP	GO_CELLULAR_RESPONSE_TO_CAMP		51	0.257035	1.1402	0.225225	0.561476	1	1632	tags=18%, list=8%, signal=19%
GO_HISTONE_METHYLTRANSFERASE_ACTIVITY	GO_HISTONE_METHYLTRANSFERASE_ACTIVITY		46	0.258062	1.11724	0.22549	0.577927	1	4428	tags=39%, list=22%, signal=50%
GO_OUTER_MITOCHONDRIAL_MEMBRANE_PROTEIN_COMPLEX	GO_OUTER_MITOCHONDRIAL_MEMBRANE_PROTEIN_COMPLEX		15	0.375739	1.19242	0.226601	0.548717	1	3275	tags=47%, list=17%, signal=56%
GO_O_METHYLTRANSFERASE_ACTIVITY	GO_O_METHYLTRANSFERASE_ACTIVITY		18	0.347456	1.19803	0.227723	0.566986	1	3050	tags=33%, list=15%, signal=39%
GO_TOOTH_MINERALIZATION	GO_TOOTH_MINERALIZATION		22	0.318656	1.14712	0.229167	0.55859	1	1286	tags=23%, list=6%, signal=24%
GO_MITOGEN_ACTIVATED_PROTEIN_KINASE_KINASE_KINASE_BINDING	GO_MITOGEN_ACTIVATED_PROTEIN_KINASE_KINASE_KINASE_BINDING		18	0.328263	1.14703	0.230047	0.557313	1	1541	tags=22%, list=8%, signal=24%
GO_CYCLIC_NUCLEOTIDE_METABOLIC_PROCESS	GO_CYCLIC_NUCLEOTIDE_METABOLIC_PROCESS		38	0.26826	1.13757	0.230769	0.561479	1	2500	tags=24%, list=13%, signal=27%
GO_NEGATIVE_REGULATION_OF_CELL_DIVISION	GO_NEGATIVE_REGULATION_OF_CELL_DIVISION		16	0.346973	1.16311	0.231481	0.554677	1	1639	tags=25%, list=8%, signal=27%
GO_GLOMERULAR_EPITHELIAL_CELL_DIFFERENTIATION	GO_GLOMERULAR_EPITHELIAL_CELL_DIFFERENTIATION		19	0.341902	1.198	0.231527	0.565031	1	3024	tags=42%, list=15%, signal=50%
GO_REGULATION_OF_POLYSACCHARIDE_METABOLIC_PROCESS	GO_REGULATION_OF_POLYSACCHARIDE_METABOLIC_PROCESS		40	0.274041	1.14973	0.232558	0.563517	1	3375	tags=30%, list=17%, signal=36%
GO_REGULATION_OF_CHONDROCYTE_DIFFERENTIATION	GO_REGULATION_OF_CHONDROCYTE_DIFFERENTIATION		46	0.254022	1.11811	0.233333	0.579685	1	3630	tags=30%, list=18%, signal=37%
GO_POLYSACCHARIDE_CATABOLIC_PROCESS	GO_POLYSACCHARIDE_CATABOLIC_PROCESS		25	0.309005	1.15175	0.234286	0.564073	1	2232	tags=24%, list=11%, signal=27%
GO_REGULATION_OF_NEURAL_PRECURSOR_CELL_PROLIFERATION	GO_REGULATION_OF_NEURAL_PRECURSOR_CELL_PROLIFERATION		81	0.218279	1.10574	0.236364	0.586758	1	2690	tags=25%, list=14%, signal=28%
GO_CGMP_METABOLIC_PROCESS	GO_CGMP_METABOLIC_PROCESS		15	0.38	1.21241	0.237885	0.560819	1	3570	tags=40%, list=18%, signal=49%
GO_HISTONE_H3_K9_METHYLATION	GO_HISTONE_H3_K9_METHYLATION		37	0.270019	1.15252	0.238095	0.565073	1	2969	tags=32%, list=15%, signal=38%
GO_P53_BINDING	GO_P53_BINDING		63	0.240963	1.12869	0.238095	0.572978	1	4112	tags=46%, list=21%, signal=58%
GO_COSTAMERE	GO_COSTAMERE		19	0.330654	1.1608	0.238342	0.554806	1	2367	tags=37%, list=12%, signal=42%
GO_SULFUR_COMPOUND_CATABOLIC_PROCESS	GO_SULFUR_COMPOUND_CATABOLIC_PROCESS		53	0.252431	1.13457	0.238532	0.56525	1	3254	tags=34%, list=16%, signal=41%
GO_SH2_DOMAIN_BINDING	GO_SH2_DOMAIN_BINDING		35	0.286956	1.14964	0.23913	0.562216	1	2339	tags=31%, list=12%, signal=36%
GO_NURD_COMPLEX	GO_NURD_COMPLEX		15	0.357271	1.16476	0.239234	0.553395	1	1660	tags=27%, list=8%, signal=29%
GO_PROTEIN_DNA_COMPLEX_DISASSEMBLY	GO_PROTEIN_DNA_COMPLEX_DISASSEMBLY		19	0.347037	1.1654	0.240909	0.556407	1	1639	tags=32%, list=8%, signal=34%
GO_ENERGY_RESERVE_METABOLIC_PROCESS	GO_ENERGY_RESERVE_METABOLIC_PROCESS		80	0.225892	1.07582	0.241379	0.620196	1	2114	tags=20%, list=11%, signal=22%
GO_P38MAPK_CASCADE	GO_P38MAPK_CASCADE		43	0.269235	1.14596	0.243243	0.554218	1	3491	tags=37%, list=18%, signal=45%
GO_L_ASCORBIC_ACID_BINDING	GO_L_ASCORBIC_ACID_BINDING		17	0.35678	1.19045	0.243478	0.546978	1	2812	tags=41%, list=14%, signal=48%
GO_POSITIVE_REGULATION_OF_MICROTUBULE_POLYMERIZATION_OR_DEPOLYMERIZATION	GO_POSITIVE_REGULATION_OF_MICROTUBULE_POLYMERIZATION_OR_DEPOLYMERIZATION		32	0.282317	1.12717	0.245161	0.570059	1	1839	tags=22%, list=9%, signal=24%
GO_POSITIVE_REGULATION_OF_CHONDROCYTE_DIFFERENTIATION	GO_POSITIVE_REGULATION_OF_CHONDROCYTE_DIFFERENTIATION		21	0.32316	1.13521	0.246154	0.564991	1	3611	tags=33%, list=18%, signal=41%
GO_NUCLEOTIDE_BINDING_DOMAIN_LEUCINE_RICH_REPEAT_CONTAINING_RECEPTOR_SIGNALING_PATHWAY	GO_NUCLEOTIDE_BINDING_DOMAIN_LEUCINE_RICH_REPEAT_CONTAINING_RECEPTOR_SIGNALING_PATHWAY		34	0.277874	1.11274	0.246154	0.573995	1	1981	tags=24%, list=10%, signal=26%
GO_LABYRINTHINE_LAYER_MORPHOGENESIS	GO_LABYRINTHINE_LAYER_MORPHOGENESIS		20	0.311546	1.12821	0.248619	0.570119	1	2039	tags=25%, list=10%, signal=28%
GO_PULMONARY_VALVE_MORPHOGENESIS	GO_PULMONARY_VALVE_MORPHOGENESIS		17	0.355507	1.17711	0.248908	0.545749	1	295	tags=18%, list=1%, signal=18%
GO_UBIQUITIN_SPECIFIC_PROTEASE_BINDING	GO_UBIQUITIN_SPECIFIC_PROTEASE_BINDING		15	0.362003	1.16497	0.25	0.55605	1	2439	tags=33%, list=12%, signal=38%
GO_MAGNESIUM_DEPENDENT_PROTEIN_SERINE_THREONINE_PHOSPHATASE_ACTIVITY	GO_MAGNESIUM_DEPENDENT_PROTEIN_SERINE_THREONINE_PHOSPHATASE_ACTIVITY		17	0.343372	1.1463	0.25	0.55624	1	1150	tags=18%, list=6%, signal=19%
GO_LAMELLIPODIUM_ASSEMBLY	GO_LAMELLIPODIUM_ASSEMBLY		57	0.239716	1.11269	0.25	0.572751	1	2260	tags=19%, list=11%, signal=22%
GO_VITAMIN_BINDING	GO_VITAMIN_BINDING		122	0.20065	1.06357	0.25	0.632408	1	1692	tags=15%, list=9%, signal=16%
GO_FATTY_ACYL_COA_BINDING	GO_FATTY_ACYL_COA_BINDING		21	0.332741	1.16769	0.252525	0.553306	1	1924	tags=33%, list=10%, signal=37%
GO_FIBROBLAST_GROWTH_FACTOR_BINDING	GO_FIBROBLAST_GROWTH_FACTOR_BINDING		22	0.317824	1.14602	0.252577	0.55552	1	3131	tags=32%, list=16%, signal=38%
GO_REGULATION_OF_SYNAPTIC_TRANSMISSION_GABAERGIC	GO_REGULATION_OF_SYNAPTIC_TRANSMISSION_GABAERGIC		31	0.279838	1.1139	0.253247	0.577579	1	2439	tags=23%, list=12%, signal=26%
GO_CARDIAC_MUSCLE_CELL_MEMBRANE_REPOLARIZATION	GO_CARDIAC_MUSCLE_CELL_MEMBRANE_REPOLARIZATION		34	0.278835	1.11605	0.255172	0.577116	1	1310	tags=21%, list=7%, signal=22%
GO_POSITIVE_REGULATION_OF_JUN_KINASE_ACTIVITY	GO_POSITIVE_REGULATION_OF_JUN_KINASE_ACTIVITY		66	0.230957	1.09611	0.25641	0.592293	1	1541	tags=15%, list=8%, signal=16%
GO_PRESYNAPTIC_ACTIVE_ZONE_MEMBRANE	GO_PRESYNAPTIC_ACTIVE_ZONE_MEMBRANE		29	0.297557	1.13958	0.257143	0.561712	1	2403	tags=28%, list=12%, signal=31%
GO_TYPE_B_PANCREATIC_CELL_DEVELOPMENT	GO_TYPE_B_PANCREATIC_CELL_DEVELOPMENT		20	0.338446	1.1648	0.257576	0.554888	1	2533	tags=35%, list=13%, signal=40%
GO_PULMONARY_VALVE_DEVELOPMENT	GO_PULMONARY_VALVE_DEVELOPMENT		21	0.325929	1.16637	0.257732	0.555378	1	2561	tags=29%, list=13%, signal=33%
GO_PODOSOME	GO_PODOSOME		29	0.305001	1.14676	0.258503	0.556591	1	574	tags=17%, list=3%, signal=18%
GO_MYELIN_SHEATH	GO_MYELIN_SHEATH		45	0.254592	1.10568	0.259259	0.584218	1	2942	tags=33%, list=15%, signal=39%
GO_RESPONSE_TO_MINERALOCORTICOID	GO_RESPONSE_TO_MINERALOCORTICOID		29	0.300472	1.15887	0.259494	0.557072	1	2351	tags=24%, list=12%, signal=27%
GO_RESPONSE_TO_STEROL	GO_RESPONSE_TO_STEROL		30	0.278252	1.11449	0.261745	0.578705	1	2939	tags=30%, list=15%, signal=35%
GO_POSITIVE_REGULATION_OF_INTERLEUKIN_1_SECRETION	GO_POSITIVE_REGULATION_OF_INTERLEUKIN_1_SECRETION		37	0.275684	1.13775	0.2625	0.562383	1	1437	tags=16%, list=7%, signal=17%
GO_SEMAPHORIN_PLEXIN_SIGNALING_PATHWAY	GO_SEMAPHORIN_PLEXIN_SIGNALING_PATHWAY		38	0.262734	1.08743	0.263514	0.603101	1	3111	tags=32%, list=16%, signal=37%
GO_REGULATION_OF_RESPIRATORY_SYSTEM_PROCESS	GO_REGULATION_OF_RESPIRATORY_SYSTEM_PROCESS		15	0.340403	1.12695	0.263598	0.569225	1	4029	tags=40%, list=20%, signal=50%
GO_POSITIVE_REGULATION_OF_GLYCOPROTEIN_BIOSYNTHETIC_PROCESS	GO_POSITIVE_REGULATION_OF_GLYCOPROTEIN_BIOSYNTHETIC_PROCESS		20	0.313011	1.11692	0.263682	0.57746	1	2274	tags=25%, list=11%, signal=28%
GO_CELLULAR_COMPONENT_DISASSEMBLY_INVOLVED_IN_EXECUTION_PHASE_OF_APOPTOSIS	GO_CELLULAR_COMPONENT_DISASSEMBLY_INVOLVED_IN_EXECUTION_PHASE_OF_APOPTOSIS		32	0.283657	1.1263	0.268456	0.569701	1	2491	tags=25%, list=13%, signal=29%
GO_MICROTUBULE_DEPOLYMERIZATION	GO_MICROTUBULE_DEPOLYMERIZATION		42	0.262798	1.11593	0.268908	0.576105	1	3328	tags=36%, list=17%, signal=43%
GO_REGULATION_OF_MRNA_POLYADENYLATION	GO_REGULATION_OF_MRNA_POLYADENYLATION		15	0.374148	1.18849	0.269058	0.541509	1	2221	tags=33%, list=11%, signal=38%
GO_RESPONSE_TO_STIMULUS_INVOLVED_IN_REGULATION_OF_MUSCLE_ADAPTATION	GO_RESPONSE_TO_STIMULUS_INVOLVED_IN_REGULATION_OF_MUSCLE_ADAPTATION		15	0.352745	1.13356	0.269406	0.563751	1	2041	tags=27%, list=10%, signal=30%
GO_POSITIVE_REGULATION_OF_PROTEIN_DEPHOSPHORYLATION	GO_POSITIVE_REGULATION_OF_PROTEIN_DEPHOSPHORYLATION		41	0.266976	1.11839	0.270073	0.58173	1	1263	tags=17%, list=6%, signal=18%
GO_COPI_COATED_VESICLE_MEMBRANE	GO_COPI_COATED_VESICLE_MEMBRANE		18	0.331679	1.14051	0.271277	0.562079	1	2167	tags=39%, list=11%, signal=44%
GO_LOW_DENSITY_LIPOPROTEIN_PARTICLE_RECEPTOR_CATABOLIC_PROCESS	GO_LOW_DENSITY_LIPOPROTEIN_PARTICLE_RECEPTOR_CATABOLIC_PROCESS		15	0.354861	1.12835	0.271967	0.572532	1	2475	tags=33%, list=12%, signal=38%
GO_PHOSPHATIDIC_ACID_METABOLIC_PROCESS	GO_PHOSPHATIDIC_ACID_METABOLIC_PROCESS		40	0.261771	1.09651	0.272	0.593848	1	2535	tags=28%, list=13%, signal=31%
GO_K63_LINKED_POLYUBIQUITIN_MODIFICATION_DEPENDENT_PROTEIN_BINDING	GO_K63_LINKED_POLYUBIQUITIN_MODIFICATION_DEPENDENT_PROTEIN_BINDING		19	0.315945	1.1241	0.276786	0.57434	1	3071	tags=47%, list=15%, signal=56%
GO_REGULATION_OF_CARDIAC_MUSCLE_CELL_MEMBRANE_REPOLARIZATION	GO_REGULATION_OF_CARDIAC_MUSCLE_CELL_MEMBRANE_REPOLARIZATION		24	0.301072	1.11301	0.280612	0.578659	1	455	tags=21%, list=2%, signal=21%
GO_REGULATION_OF_LIPID_CATABOLIC_PROCESS	GO_REGULATION_OF_LIPID_CATABOLIC_PROCESS		53	0.240099	1.07833	0.284091	0.615782	1	3871	tags=28%, list=20%, signal=35%
GO_ACTIN_FILAMENT_BUNDLE	GO_ACTIN_FILAMENT_BUNDLE		67	0.221961	1.09152	0.285714	0.601303	1	2676	tags=24%, list=13%, signal=28%
GO_VENTRAL_SPINAL_CORD_DEVELOPMENT	GO_VENTRAL_SPINAL_CORD_DEVELOPMENT		48	0.2414	1.08501	0.285714	0.603119	1	2521	tags=23%, list=13%, signal=26%
GO_MEMBRANE_DEPOLARIZATION_DURING_CARDIAC_MUSCLE_CELL_ACTION_POTENTIAL	GO_MEMBRANE_DEPOLARIZATION_DURING_CARDIAC_MUSCLE_CELL_ACTION_POTENTIAL		22	0.320707	1.13395	0.286458	0.564185	1	455	tags=14%, list=2%, signal=14%
GO_REGULATION_OF_ESTABLISHMENT_OF_PROTEIN_LOCALIZATION_TO_MITOCHONDRION	GO_REGULATION_OF_ESTABLISHMENT_OF_PROTEIN_LOCALIZATION_TO_MITOCHONDRION		69	0.23238	1.09438	0.287879	0.595747	1	3316	tags=35%, list=17%, signal=42%
GO_PROLINE_RICH_REGION_BINDING	GO_PROLINE_RICH_REGION_BINDING		18	0.327537	1.11297	0.289216	0.576029	1	2212	tags=33%, list=11%, signal=37%
GO_G_PROTEIN_COUPLED_RECEPTOR_INTERNALIZATION	GO_G_PROTEIN_COUPLED_RECEPTOR_INTERNALIZATION		16	0.330481	1.09906	0.289362	0.595844	1	2183	tags=31%, list=11%, signal=35%
GO_LIPOPROTEIN_PARTICLE_RECEPTOR_ACTIVITY	GO_LIPOPROTEIN_PARTICLE_RECEPTOR_ACTIVITY		15	0.324608	1.07202	0.290909	0.617882	1	2708	tags=33%, list=14%, signal=39%
GO_RETINOIC_ACID_RECEPTOR_BINDING	GO_RETINOIC_ACID_RECEPTOR_BINDING		27	0.293169	1.10229	0.291139	0.591059	1	1753	tags=22%, list=9%, signal=24%
GO_LAMELLAR_BODY	GO_LAMELLAR_BODY		17	0.329712	1.11809	0.292683	0.578314	1	2436	tags=29%, list=12%, signal=34%
GO_CAMP_BINDING	GO_CAMP_BINDING		23	0.303102	1.09913	0.292683	0.59699	1	2739	tags=30%, list=14%, signal=35%
GO_INTRINSIC_COMPONENT_OF_PRESYNAPTIC_ACTIVE_ZONE_MEMBRANE	GO_INTRINSIC_COMPONENT_OF_PRESYNAPTIC_ACTIVE_ZONE_MEMBRANE		18	0.314754	1.08888	0.293103	0.603133	1	1165	tags=22%, list=6%, signal=24%
GO_NEGATIVE_REGULATION_OF_TOLL_LIKE_RECEPTOR_SIGNALING_PATHWAY	GO_NEGATIVE_REGULATION_OF_TOLL_LIKE_RECEPTOR_SIGNALING_PATHWAY		37	0.261304	1.113	0.293706	0.577302	1	2631	tags=22%, list=13%, signal=25%
GO_INTEGRIN_ACTIVATION	GO_INTEGRIN_ACTIVATION		24	0.305233	1.1477	0.293785	0.561561	1	2421	tags=33%, list=12%, signal=38%
GO_PEPTIDYL_LYSINE_DIMETHYLATION	GO_PEPTIDYL_LYSINE_DIMETHYLATION		16	0.336237	1.14514	0.294118	0.554953	1	4408	tags=50%, list=22%, signal=64%
GO_MAMMARY_GLAND_MORPHOGENESIS	GO_MAMMARY_GLAND_MORPHOGENESIS		45	0.256308	1.09718	0.296296	0.594596	1	3123	tags=29%, list=16%, signal=34%
GO_CARDIAC_MUSCLE_CONTRACTION	GO_CARDIAC_MUSCLE_CONTRACTION		130	0.195452	1.06515	0.296296	0.630575	1	1310	tags=12%, list=7%, signal=12%
GO_ANTIBIOTIC_BIOSYNTHETIC_PROCESS	GO_ANTIBIOTIC_BIOSYNTHETIC_PROCESS		19	0.300616	1.08652	0.297561	0.602941	1	3421	tags=42%, list=17%, signal=51%
GO_RHYTHMIC_BEHAVIOR	GO_RHYTHMIC_BEHAVIOR		46	0.252487	1.09882	0.299145	0.595164	1	2780	tags=26%, list=14%, signal=30%
GO_RNA_DESTABILIZATION	GO_RNA_DESTABILIZATION		28	0.291029	1.10128	0.299401	0.592554	1	1554	tags=25%, list=8%, signal=27%
GO_PREPULSE_INHIBITION	GO_PREPULSE_INHIBITION		15	0.349988	1.10673	0.3	0.585354	1	4144	tags=40%, list=21%, signal=51%
GO_MEMBRANE_REPOLARIZATION_DURING_ACTION_POTENTIAL	GO_MEMBRANE_REPOLARIZATION_DURING_ACTION_POTENTIAL		24	0.294263	1.08258	0.3	0.608625	1	1310	tags=21%, list=7%, signal=22%
GO_I_BAND	GO_I_BAND		138	0.188452	1.04475	0.3	0.65765	1	949	tags=11%, list=5%, signal=11%
GO_REGULATION_OF_EXCRETION	GO_REGULATION_OF_EXCRETION		23	0.312456	1.12875	0.304569	0.574217	1	2296	tags=26%, list=12%, signal=29%
GO_DEMETHYLATION	GO_DEMETHYLATION		67	0.215325	1.05729	0.304878	0.643958	1	2308	tags=19%, list=12%, signal=22%
GO_SECONDARY_METABOLITE_BIOSYNTHETIC_PROCESS	GO_SECONDARY_METABOLITE_BIOSYNTHETIC_PROCESS		27	0.285815	1.09758	0.306748	0.594797	1	1900	tags=22%, list=10%, signal=25%
GO_CONVERGENT_EXTENSION	GO_CONVERGENT_EXTENSION		15	0.327072	1.09666	0.306977	0.594746	1	3323	tags=33%, list=17%, signal=40%
GO_BRAIN_MORPHOGENESIS	GO_BRAIN_MORPHOGENESIS		31	0.274912	1.09835	0.30719	0.595252	1	2530	tags=23%, list=13%, signal=26%
GO_NEGATIVE_REGULATION_OF_DNA_BIOSYNTHETIC_PROCESS	GO_NEGATIVE_REGULATION_OF_DNA_BIOSYNTHETIC_PROCESS		35	0.275529	1.10465	0.308271	0.585745	1	1911	tags=20%, list=10%, signal=22%
GO_CARDIAC_MUSCLE_CELL_ACTION_POTENTIAL	GO_CARDIAC_MUSCLE_CELL_ACTION_POTENTIAL		66	0.223421	1.07415	0.308642	0.618478	1	1310	tags=14%, list=7%, signal=15%
GO_MYELIN_MAINTENANCE	GO_MYELIN_MAINTENANCE		15	0.339193	1.09793	0.309917	0.595116	1	62	tags=13%, list=0%, signal=13%
GO_SWI_SNF_COMPLEX	GO_SWI_SNF_COMPLEX		19	0.309732	1.08902	0.310502	0.604081	1	2037	tags=32%, list=10%, signal=35%
GO_COP9_SIGNALOSOME	GO_COP9_SIGNALOSOME		32	0.278426	1.07814	0.312925	0.614912	1	2072	tags=22%, list=10%, signal=24%
GO_POSITIVE_REGULATION_OF_BEHAVIOR	GO_POSITIVE_REGULATION_OF_BEHAVIOR		26	0.276874	1.08175	0.313253	0.609721	1	2982	tags=27%, list=15%, signal=32%
GO_CELL_DIFFERENTIATION_IN_SPINAL_CORD	GO_CELL_DIFFERENTIATION_IN_SPINAL_CORD		54	0.224697	1.04027	0.314607	0.661593	1	3901	tags=28%, list=20%, signal=34%
GO_NEGATIVE_REGULATION_OF_HISTONE_MODIFICATION	GO_NEGATIVE_REGULATION_OF_HISTONE_MODIFICATION		39	0.253696	1.08814	0.315315	0.603815	1	2308	tags=23%, list=12%, signal=26%
GO_REGULATION_OF_PROTON_TRANSPORT	GO_REGULATION_OF_PROTON_TRANSPORT		21	0.30708	1.09626	0.317757	0.593211	1	1239	tags=24%, list=6%, signal=25%
GO_AMINOGLYCAN_CATABOLIC_PROCESS	GO_AMINOGLYCAN_CATABOLIC_PROCESS		63	0.224104	1.05341	0.318182	0.648388	1	3956	tags=37%, list=20%, signal=45%
GO_DICARBOXYLIC_ACID_CATABOLIC_PROCESS	GO_DICARBOXYLIC_ACID_CATABOLIC_PROCESS		16	0.334146	1.09058	0.320175	0.601175	1	328	tags=13%, list=2%, signal=13%
GO_REGULATION_OF_AXON_GUIDANCE	GO_REGULATION_OF_AXON_GUIDANCE		43	0.24805	1.08691	0.321101	0.603151	1	984	tags=16%, list=5%, signal=17%
GO_POSITIVE_REGULATION_OF_NEURAL_PRECURSOR_CELL_PROLIFERATION	GO_POSITIVE_REGULATION_OF_NEURAL_PRECURSOR_CELL_PROLIFERATION		50	0.239997	1.05717	0.322917	0.641695	1	2690	tags=24%, list=14%, signal=28%
GO_ENTRAINMENT_OF_CIRCADIAN_CLOCK	GO_ENTRAINMENT_OF_CIRCADIAN_CLOCK		26	0.291027	1.10571	0.323699	0.585479	1	2073	tags=31%, list=10%, signal=34%
GO_REGULATION_OF_CARTILAGE_DEVELOPMENT	GO_REGULATION_OF_CARTILAGE_DEVELOPMENT		61	0.22979	1.07276	0.329114	0.621087	1	3630	tags=33%, list=18%, signal=40%
GO_CLATHRIN_BINDING	GO_CLATHRIN_BINDING		54	0.23366	1.05993	0.33	0.639184	1	2402	tags=28%, list=12%, signal=32%
GO_SPINAL_CORD_MOTOR_NEURON_DIFFERENTIATION	GO_SPINAL_CORD_MOTOR_NEURON_DIFFERENTIATION		34	0.258714	1.06999	0.330882	0.619687	1	2998	tags=26%, list=15%, signal=31%
GO_FILAMENTOUS_ACTIN	GO_FILAMENTOUS_ACTIN		36	0.252258	1.06152	0.331034	0.637155	1	2163	tags=28%, list=11%, signal=31%
GO_POSITIVE_REGULATION_OF_CYTOSKELETON_ORGANIZATION	GO_POSITIVE_REGULATION_OF_CYTOSKELETON_ORGANIZATION		210	0.176137	0.984644	0.333333	0.733042	1	2306	tags=17%, list=12%, signal=19%
GO_GLIOGENESIS	GO_GLIOGENESIS		277	0.179696	0.982251	0.333333	0.736355	1	2540	tags=20%, list=13%, signal=23%
GO_REGULATION_OF_NEUROBLAST_PROLIFERATION	GO_REGULATION_OF_NEUROBLAST_PROLIFERATION		30	0.278493	1.08511	0.33557	0.604151	1	2530	tags=30%, list=13%, signal=34%
GO_REGULATION_OF_PLASMA_MEMBRANE_ORGANIZATION	GO_REGULATION_OF_PLASMA_MEMBRANE_ORGANIZATION		15	0.325158	1.05025	0.336134	0.6535	1	2605	tags=33%, list=13%, signal=38%
GO_NEGATIVE_REGULATION_OF_BLOOD_PRESSURE	GO_NEGATIVE_REGULATION_OF_BLOOD_PRESSURE		46	0.248614	1.09351	0.336283	0.596799	1	920	tags=13%, list=5%, signal=14%
GO_REGULATION_OF_TUMOR_NECROSIS_FACTOR_MEDIATED_SIGNALING_PATHWAY	GO_REGULATION_OF_TUMOR_NECROSIS_FACTOR_MEDIATED_SIGNALING_PATHWAY		52	0.23273	1.04525	0.336957	0.657485	1	2219	tags=19%, list=11%, signal=22%
GO_DNA_CATABOLIC_PROCESS_ENDONUCLEOLYTIC	GO_DNA_CATABOLIC_PROCESS_ENDONUCLEOLYTIC		30	0.270736	1.07522	0.337209	0.62071	1	2595	tags=27%, list=13%, signal=31%
GO_REGULATION_OF_MRNA_3_END_PROCESSING	GO_REGULATION_OF_MRNA_3_END_PROCESSING		26	0.278639	1.06449	0.337423	0.631134	1	2409	tags=35%, list=12%, signal=39%
GO_REGULATION_OF_MITOCHONDRIAL_FISSION	GO_REGULATION_OF_MITOCHONDRIAL_FISSION		19	0.308809	1.08546	0.340206	0.604531	1	1019	tags=16%, list=5%, signal=17%
GO_REGULATION_OF_CIRCADIAN_SLEEP_WAKE_CYCLE	GO_REGULATION_OF_CIRCADIAN_SLEEP_WAKE_CYCLE		21	0.288955	1.05558	0.340206	0.644796	1	4611	tags=33%, list=23%, signal=43%
GO_MAIN_AXON	GO_MAIN_AXON		67	0.223576	1.05219	0.341772	0.650604	1	1899	tags=21%, list=10%, signal=23%
GO_EMBRYONIC_PLACENTA_MORPHOGENESIS	GO_EMBRYONIC_PLACENTA_MORPHOGENESIS		25	0.284208	1.05794	0.342697	0.643397	1	2179	tags=24%, list=11%, signal=27%
GO_MUSCLE_ADAPTATION	GO_MUSCLE_ADAPTATION		106	0.207554	1.07441	0.34375	0.620418	1	3856	tags=30%, list=19%, signal=37%
GO_NEGATIVE_REGULATION_OF_DIGESTIVE_SYSTEM_PROCESS	GO_NEGATIVE_REGULATION_OF_DIGESTIVE_SYSTEM_PROCESS		17	0.318336	1.07472	0.345972	0.620799	1	666	tags=18%, list=3%, signal=18%
GO_REGULATION_OF_CHOLESTEROL_METABOLIC_PROCESS	GO_REGULATION_OF_CHOLESTEROL_METABOLIC_PROCESS		54	0.234183	1.04262	0.346535	0.661245	1	3370	tags=37%, list=17%, signal=45%
GO_PROTEIN_KINASE_C_ACTIVITY	GO_PROTEIN_KINASE_C_ACTIVITY		16	0.315288	1.08026	0.349057	0.612821	1	2605	tags=31%, list=13%, signal=36%
GO_HISTONE_H3_K27_METHYLATION	GO_HISTONE_H3_K27_METHYLATION		15	0.327087	1.0482	0.351931	0.652924	1	3842	tags=40%, list=19%, signal=50%
GO_ENDOTHELIAL_CELL_DEVELOPMENT	GO_ENDOTHELIAL_CELL_DEVELOPMENT		57	0.224538	1.05727	0.354167	0.642689	1	576	tags=11%, list=3%, signal=11%
GO_POSITIVE_REGULATION_OF_DENDRITE_MORPHOGENESIS	GO_POSITIVE_REGULATION_OF_DENDRITE_MORPHOGENESIS		41	0.246011	1.07022	0.354331	0.620296	1	957	tags=17%, list=5%, signal=18%
GO_POSITIVE_REGULATION_OF_GLIAL_CELL_PROLIFERATION	GO_POSITIVE_REGULATION_OF_GLIAL_CELL_PROLIFERATION		15	0.327848	1.07272	0.356522	0.619855	1	4867	tags=53%, list=25%, signal=71%
GO_POSITIVE_REGULATION_OF_EXCITATORY_POSTSYNAPTIC_POTENTIAL	GO_POSITIVE_REGULATION_OF_EXCITATORY_POSTSYNAPTIC_POTENTIAL		28	0.282016	1.06818	0.356725	0.62324	1	3323	tags=36%, list=17%, signal=43%
GO_SARCOLEMMA	GO_SARCOLEMMA		131	0.197395	1.07263	0.357143	0.618756	1	2419	tags=18%, list=12%, signal=20%
GO_NAD_DEPENDENT_PROTEIN_DEACETYLASE_ACTIVITY	GO_NAD_DEPENDENT_PROTEIN_DEACETYLASE_ACTIVITY		16	0.314298	1.05215	0.36036	0.649416	1	2503	tags=38%, list=13%, signal=43%
GO_LATERAL_MESODERM_DEVELOPMENT	GO_LATERAL_MESODERM_DEVELOPMENT		15	0.328949	1.07438	0.360731	0.61918	1	2530	tags=40%, list=13%, signal=46%
GO_DNA_CATABOLIC_PROCESS	GO_DNA_CATABOLIC_PROCESS		38	0.247235	1.03693	0.361345	0.662262	1	2595	tags=24%, list=13%, signal=27%
GO_CELL_PROLIFERATION_INVOLVED_IN_KIDNEY_DEVELOPMENT	GO_CELL_PROLIFERATION_INVOLVED_IN_KIDNEY_DEVELOPMENT		20	0.294098	1.04789	0.367021	0.652417	1	2533	tags=30%, list=13%, signal=34%
GO_MICROFILAMENT_MOTOR_ACTIVITY	GO_MICROFILAMENT_MOTOR_ACTIVITY		22	0.287473	1.04163	0.367647	0.660095	1	2833	tags=27%, list=14%, signal=32%
GO_REGULATION_OF_EARLY_ENDOSOME_TO_LATE_ENDOSOME_TRANSPORT	GO_REGULATION_OF_EARLY_ENDOSOME_TO_LATE_ENDOSOME_TRANSPORT		17	0.302299	1.04932	0.368421	0.653688	1	2866	tags=41%, list=14%, signal=48%
GO_REGULATION_OF_PRODUCTION_OF_SMALL_RNA_INVOLVED_IN_GENE_SILENCING_BY_RNA	GO_REGULATION_OF_PRODUCTION_OF_SMALL_RNA_INVOLVED_IN_GENE_SILENCING_BY_RNA		20	0.298773	1.03878	0.369231	0.66213	1	3083	tags=35%, list=16%, signal=41%
GO_POSITIVE_REGULATION_OF_EPIDERMIS_DEVELOPMENT	GO_POSITIVE_REGULATION_OF_EPIDERMIS_DEVELOPMENT		35	0.256316	1.02386	0.371901	0.682848	1	3474	tags=29%, list=18%, signal=35%
GO_POSITIVE_REGULATION_OF_GLIOGENESIS	GO_POSITIVE_REGULATION_OF_GLIOGENESIS		71	0.212727	1.03286	0.373134	0.668766	1	3330	tags=28%, list=17%, signal=34%
GO_NEGATIVE_REGULATION_OF_CELL_SUBSTRATE_JUNCTION_ORGANIZATION	GO_NEGATIVE_REGULATION_OF_CELL_SUBSTRATE_JUNCTION_ORGANIZATION		17	0.308055	1.0224	0.376569	0.680589	1	3830	tags=59%, list=19%, signal=73%
GO_RAS_GUANYL_NUCLEOTIDE_EXCHANGE_FACTOR_ACTIVITY	GO_RAS_GUANYL_NUCLEOTIDE_EXCHANGE_FACTOR_ACTIVITY		132	0.193221	1.0194	0.380952	0.68388	1	2637	tags=21%, list=13%, signal=24%
GO_FEMALE_GENITALIA_DEVELOPMENT	GO_FEMALE_GENITALIA_DEVELOPMENT		17	0.305621	1.04208	0.381643	0.661464	1	2189	tags=24%, list=11%, signal=26%
GO_SYNAPTIC_TRANSMISSION_GABAERGIC	GO_SYNAPTIC_TRANSMISSION_GABAERGIC		44	0.239959	1.03099	0.381679	0.672834	1	2439	tags=20%, list=12%, signal=23%
GO_RNA_POLYMERASE_II_REPRESSING_TRANSCRIPTION_FACTOR_BINDING	GO_RNA_POLYMERASE_II_REPRESSING_TRANSCRIPTION_FACTOR_BINDING		35	0.252505	1.03718	0.381944	0.664111	1	1406	tags=17%, list=7%, signal=18%
GO_POSITIVE_REGULATION_OF_MRNA_METABOLIC_PROCESS	GO_POSITIVE_REGULATION_OF_MRNA_METABOLIC_PROCESS		73	0.21127	1.03489	0.383333	0.66553	1	1590	tags=19%, list=8%, signal=21%
GO_MIDDLE_EAR_MORPHOGENESIS	GO_MIDDLE_EAR_MORPHOGENESIS		20	0.299298	1.04443	0.383721	0.657269	1	1331	tags=25%, list=7%, signal=27%
GO_REGULATION_OF_SUPEROXIDE_ANION_GENERATION	GO_REGULATION_OF_SUPEROXIDE_ANION_GENERATION		22	0.291954	1.04196	0.385027	0.660466	1	3012	tags=32%, list=15%, signal=37%
GO_GAMMA_AMINOBUTYRIC_ACID_SIGNALING_PATHWAY	GO_GAMMA_AMINOBUTYRIC_ACID_SIGNALING_PATHWAY		24	0.278586	1.02298	0.385475	0.681497	1	14307	tags=100%, list=72%, signal=359%
GO_SPECIFICATION_OF_ANIMAL_ORGAN_IDENTITY	GO_SPECIFICATION_OF_ANIMAL_ORGAN_IDENTITY		34	0.256718	1.03297	0.386861	0.669759	1	2921	tags=35%, list=15%, signal=41%
GO_REGULATION_OF_ACTIN_CYTOSKELETON_REORGANIZATION	GO_REGULATION_OF_ACTIN_CYTOSKELETON_REORGANIZATION		37	0.235907	1.0277	0.387597	0.679323	1	3141	tags=30%, list=16%, signal=35%
GO_REGULATION_OF_TRIGLYCERIDE_METABOLIC_PROCESS	GO_REGULATION_OF_TRIGLYCERIDE_METABOLIC_PROCESS		36	0.250742	1.02026	0.389706	0.682738	1	3249	tags=25%, list=16%, signal=30%
GO_LIPID_OXIDATION	GO_LIPID_OXIDATION		99	0.197759	1.04612	0.390244	0.656343	1	2094	tags=18%, list=11%, signal=20%
GO_MORPHOGENESIS_OF_AN_ENDOTHELIUM	GO_MORPHOGENESIS_OF_AN_ENDOTHELIUM		18	0.297839	1.02653	0.390476	0.677612	1	13924	tags=100%, list=70%, signal=336%
GO_NADPLUS_KINASE_ACTIVITY	GO_NADPLUS_KINASE_ACTIVITY		16	0.316439	1.05024	0.390756	0.652215	1	1737	tags=25%, list=9%, signal=27%
GO_MUSCLE_HYPERTROPHY	GO_MUSCLE_HYPERTROPHY		85	0.194253	1.00701	0.392857	0.702254	1	3634	tags=28%, list=18%, signal=34%
GO_POSITIVE_REGULATION_OF_CELLULAR_RESPONSE_TO_TRANSFORMING_GROWTH_FACTOR_BETA_STIMULUS	GO_POSITIVE_REGULATION_OF_CELLULAR_RESPONSE_TO_TRANSFORMING_GROWTH_FACTOR_BETA_STIMULUS		28	0.275708	1.03799	0.393548	0.663094	1	931	tags=18%, list=5%, signal=19%
GO_MLL1_2_COMPLEX	GO_MLL1_2_COMPLEX		28	0.269197	1.06109	0.394904	0.637076	1	2844	tags=36%, list=14%, signal=42%
GO_REGULATION_OF_EPITHELIAL_TUBE_FORMATION	GO_REGULATION_OF_EPITHELIAL_TUBE_FORMATION		18	0.318834	1.05348	0.395556	0.649519	1	1331	tags=17%, list=7%, signal=18%
GO_NODAL_SIGNALING_PATHWAY	GO_NODAL_SIGNALING_PATHWAY		16	0.303858	1.02336	0.397059	0.681648	1	1796	tags=19%, list=9%, signal=21%
GO_EMBRYONIC_DIGESTIVE_TRACT_MORPHOGENESIS	GO_EMBRYONIC_DIGESTIVE_TRACT_MORPHOGENESIS		18	0.302346	1.03999	0.4	0.661189	1	2521	tags=22%, list=13%, signal=25%
GO_REGULATION_OF_EXCITATORY_SYNAPSE_ASSEMBLY	GO_REGULATION_OF_EXCITATORY_SYNAPSE_ASSEMBLY		15	0.322663	1.03929	0.40081	0.661916	1	1234	tags=13%, list=6%, signal=14%
GO_VITAMIN_D_METABOLIC_PROCESS	GO_VITAMIN_D_METABOLIC_PROCESS		22	0.279885	1.01148	0.403226	0.695565	1	1277	tags=18%, list=6%, signal=19%
GO_HEPARAN_SULFATE_PROTEOGLYCAN_BIOSYNTHETIC_PROCESS	GO_HEPARAN_SULFATE_PROTEOGLYCAN_BIOSYNTHETIC_PROCESS		25	0.262817	1.03059	0.403974	0.672568	1	1301	tags=16%, list=7%, signal=17%
GO_NEGATIVE_REGULATION_OF_RHO_PROTEIN_SIGNAL_TRANSDUCTION	GO_NEGATIVE_REGULATION_OF_RHO_PROTEIN_SIGNAL_TRANSDUCTION		21	0.294172	1.04827	0.404908	0.654	1	3411	tags=33%, list=17%, signal=40%
GO_MEMBRANE_DEPOLARIZATION_DURING_ACTION_POTENTIAL	GO_MEMBRANE_DEPOLARIZATION_DURING_ACTION_POTENTIAL		36	0.243185	1.01364	0.404908	0.698074	1	1732	tags=14%, list=9%, signal=15%
GO_REGULATION_OF_RESPONSE_TO_FOOD	GO_REGULATION_OF_RESPONSE_TO_FOOD		18	0.299281	1.02768	0.406699	0.67683	1	920	tags=17%, list=5%, signal=17%
GO_GABA_RECEPTOR_ACTIVITY	GO_GABA_RECEPTOR_ACTIVITY		22	0.278558	1.03588	0.406977	0.663981	1	14307	tags=100%, list=72%, signal=359%
GO_REGULATION_OF_LEUKOCYTE_ADHESION_TO_VASCULAR_ENDOTHELIAL_CELL	GO_REGULATION_OF_LEUKOCYTE_ADHESION_TO_VASCULAR_ENDOTHELIAL_CELL		19	0.297652	1.03704	0.408377	0.66326	1	2690	tags=26%, list=14%, signal=30%
GO_ASPARTIC_TYPE_PEPTIDASE_ACTIVITY	GO_ASPARTIC_TYPE_PEPTIDASE_ACTIVITY		24	0.279344	1.04928	0.409091	0.652482	1	1765	tags=21%, list=9%, signal=23%
GO_PHAGOSOME_MATURATION	GO_PHAGOSOME_MATURATION		44	0.238407	1.02769	0.409836	0.678096	1	1939	tags=18%, list=10%, signal=20%
GO_CORPUS_CALLOSUM_DEVELOPMENT	GO_CORPUS_CALLOSUM_DEVELOPMENT		16	0.314241	1.0405	0.414847	0.662197	1	527	tags=13%, list=3%, signal=13%
GO_PROTEIN_HYDROXYLATION	GO_PROTEIN_HYDROXYLATION		19	0.277305	0.997433	0.415385	0.71541	1	2812	tags=42%, list=14%, signal=49%
GO_MUSCLE_HYPERTROPHY_IN_RESPONSE_TO_STRESS	GO_MUSCLE_HYPERTROPHY_IN_RESPONSE_TO_STRESS		22	0.274604	1.02271	0.416667	0.680969	1	3634	tags=36%, list=18%, signal=44%
GO_EXOGENOUS_PROTEIN_BINDING	GO_EXOGENOUS_PROTEIN_BINDING		71	0.218899	1.02206	0.416667	0.680241	1	2257	tags=18%, list=11%, signal=21%
GO_ALDITOL_METABOLIC_PROCESS	GO_ALDITOL_METABOLIC_PROCESS		22	0.267538	1.00791	0.417989	0.702291	1	4528	tags=36%, list=23%, signal=47%
GO_HEAT_GENERATION	GO_HEAT_GENERATION		17	0.295461	0.989452	0.419192	0.725446	1	2989	tags=35%, list=15%, signal=42%
GO_AXONAL_GROWTH_CONE	GO_AXONAL_GROWTH_CONE		27	0.254249	1.00433	0.420732	0.705019	1	2769	tags=33%, list=14%, signal=39%
GO_REGULATION_OF_PROTEIN_KINASE_C_SIGNALING	GO_REGULATION_OF_PROTEIN_KINASE_C_SIGNALING		15	0.311979	0.996979	0.422018	0.712871	1	13643	tags=100%, list=69%, signal=320%
GO_TUBE_CLOSURE	GO_TUBE_CLOSURE		88	0.209043	1.02504	0.423077	0.68056	1	2567	tags=24%, list=13%, signal=27%
GO_VACUOLAR_PROTON_TRANSPORTING_V_TYPE_ATPASE_COMPLEX	GO_VACUOLAR_PROTON_TRANSPORTING_V_TYPE_ATPASE_COMPLEX		17	0.296978	0.999681	0.42449	0.711296	1	1239	tags=24%, list=6%, signal=25%
GO_CYCLIN_BINDING	GO_CYCLIN_BINDING		29	0.262958	1.0117	0.424837	0.696158	1	3505	tags=31%, list=18%, signal=38%
GO_PHAGOPHORE_ASSEMBLY_SITE	GO_PHAGOPHORE_ASSEMBLY_SITE		27	0.256615	1.00665	0.426667	0.70077	1	2057	tags=30%, list=10%, signal=33%
GO_PROTEIN_EXIT_FROM_ENDOPLASMIC_RETICULUM	GO_PROTEIN_EXIT_FROM_ENDOPLASMIC_RETICULUM		41	0.235142	1.02366	0.427273	0.682162	1	2815	tags=29%, list=14%, signal=34%
GO_POLARIZED_EPITHELIAL_CELL_DIFFERENTIATION	GO_POLARIZED_EPITHELIAL_CELL_DIFFERENTIATION		19	0.278534	1.00287	0.430052	0.706668	1	356	tags=16%, list=2%, signal=16%
GO_PHAGOSOME_ACIDIFICATION	GO_PHAGOSOME_ACIDIFICATION		28	0.261681	1.00935	0.435897	0.699335	1	1239	tags=18%, list=6%, signal=19%
GO_PEROXISOME_PROLIFERATOR_ACTIVATED_RECEPTOR_SIGNALING_PATHWAY	GO_PEROXISOME_PROLIFERATOR_ACTIVATED_RECEPTOR_SIGNALING_PATHWAY		21	0.278312	1.0057	0.436275	0.702198	1	3505	tags=33%, list=18%, signal=40%
GO_DETECTION_OF_LIGHT_STIMULUS_INVOLVED_IN_SENSORY_PERCEPTION	GO_DETECTION_OF_LIGHT_STIMULUS_INVOLVED_IN_SENSORY_PERCEPTION		18	0.282624	0.997426	0.436275	0.714181	1	1000	tags=17%, list=5%, signal=18%
GO_NEGATIVE_REGULATION_OF_MORPHOGENESIS_OF_AN_EPITHELIUM	GO_NEGATIVE_REGULATION_OF_MORPHOGENESIS_OF_AN_EPITHELIUM		16	0.313268	1.01103	0.436364	0.695758	1	3186	tags=31%, list=16%, signal=37%
GO_GAMMA_TUBULIN_BINDING	GO_GAMMA_TUBULIN_BINDING		26	0.268188	1.01284	0.436782	0.699196	1	1336	tags=15%, list=7%, signal=16%
GO_PROTEIN_STABILIZATION	GO_PROTEIN_STABILIZATION		165	0.183434	1.01524	0.4375	0.694689	1	2672	tags=21%, list=13%, signal=24%
GO_U5_SNRNP	GO_U5_SNRNP		16	0.297917	0.993424	0.437768	0.7193	1	2497	tags=31%, list=13%, signal=36%
GO_NEGATIVE_REGULATION_OF_SIGNAL_TRANSDUCTION_IN_ABSENCE_OF_LIGAND	GO_NEGATIVE_REGULATION_OF_SIGNAL_TRANSDUCTION_IN_ABSENCE_OF_LIGAND		35	0.245625	1.00671	0.437956	0.701854	1	2199	tags=23%, list=11%, signal=26%
GO_FATTY_ACID_CATABOLIC_PROCESS	GO_FATTY_ACID_CATABOLIC_PROCESS		102	0.202859	1.02089	0.439024	0.682278	1	1078	tags=14%, list=5%, signal=14%
GO_C21_STEROID_HORMONE_BIOSYNTHETIC_PROCESS	GO_C21_STEROID_HORMONE_BIOSYNTHETIC_PROCESS		24	0.269238	1.01237	0.439306	0.696634	1	2373	tags=21%, list=12%, signal=24%
GO_ENDODEOXYRIBONUCLEASE_ACTIVITY	GO_ENDODEOXYRIBONUCLEASE_ACTIVITY		39	0.234169	0.979628	0.441176	0.740072	1	1159	tags=13%, list=6%, signal=14%
GO_OXIDOREDUCTION_COENZYME_METABOLIC_PROCESS	GO_OXIDOREDUCTION_COENZYME_METABOLIC_PROCESS		45	0.226109	1.00251	0.441441	0.706513	1	3831	tags=36%, list=19%, signal=44%
GO_ARF_GUANYL_NUCLEOTIDE_EXCHANGE_FACTOR_ACTIVITY	GO_ARF_GUANYL_NUCLEOTIDE_EXCHANGE_FACTOR_ACTIVITY		18	0.297183	1.00105	0.442478	0.708307	1	1967	tags=22%, list=10%, signal=25%
GO_MAINTENANCE_OF_PROTEIN_LOCALIZATION_IN_ORGANELLE	GO_MAINTENANCE_OF_PROTEIN_LOCALIZATION_IN_ORGANELLE		39	0.248583	1.02745	0.445312	0.676179	1	2751	tags=36%, list=14%, signal=42%
GO_CHEMOSENSORY_BEHAVIOR	GO_CHEMOSENSORY_BEHAVIOR		16	0.297017	0.986743	0.445946	0.730722	1	3271	tags=31%, list=17%, signal=37%
GO_VOLTAGE_GATED_SODIUM_CHANNEL_COMPLEX	GO_VOLTAGE_GATED_SODIUM_CHANNEL_COMPLEX		17	0.294828	0.978472	0.446237	0.737063	1	455	tags=12%, list=2%, signal=12%
GO_BRANCHING_INVOLVED_IN_MAMMARY_GLAND_DUCT_MORPHOGENESIS	GO_BRANCHING_INVOLVED_IN_MAMMARY_GLAND_DUCT_MORPHOGENESIS		24	0.271924	0.993622	0.446927	0.720032	1	1496	tags=21%, list=8%, signal=23%
GO_REGULATION_OF_VASCULAR_PERMEABILITY	GO_REGULATION_OF_VASCULAR_PERMEABILITY		36	0.236607	1.01281	0.447761	0.696712	1	974	tags=14%, list=5%, signal=15%
GO_PHYSIOLOGICAL_CARDIAC_MUSCLE_HYPERTROPHY	GO_PHYSIOLOGICAL_CARDIAC_MUSCLE_HYPERTROPHY		27	0.273178	1.00753	0.449367	0.702102	1	1782	tags=22%, list=9%, signal=24%
GO_REGULATION_OF_HEART_RATE_BY_CARDIAC_CONDUCTION	GO_REGULATION_OF_HEART_RATE_BY_CARDIAC_CONDUCTION		36	0.240445	1.00325	0.455224	0.706919	1	1732	tags=17%, list=9%, signal=18%
GO_REGULATION_OF_LAMELLIPODIUM_ASSEMBLY	GO_REGULATION_OF_LAMELLIPODIUM_ASSEMBLY		27	0.269811	1.00217	0.458599	0.706306	1	2041	tags=19%, list=10%, signal=21%
GO_ENTRY_INTO_HOST	GO_ENTRY_INTO_HOST		128	0.184555	0.960767	0.461538	0.762704	1	2257	tags=17%, list=11%, signal=19%
GO_NEGATIVE_REGULATION_OF_VIRAL_ENTRY_INTO_HOST_CELL	GO_NEGATIVE_REGULATION_OF_VIRAL_ENTRY_INTO_HOST_CELL		18	0.289265	0.978704	0.465217	0.740082	1	1228	tags=22%, list=6%, signal=24%
GO_RESPONSE_TO_CORTICOSTERONE	GO_RESPONSE_TO_CORTICOSTERONE		20	0.266571	0.962173	0.465608	0.761246	1	4236	tags=45%, list=21%, signal=57%
GO_PLATELET_MORPHOGENESIS	GO_PLATELET_MORPHOGENESIS		20	0.274832	0.985932	0.465686	0.731687	1	2921	tags=35%, list=15%, signal=41%
GO_MEMBRANE_DISASSEMBLY	GO_MEMBRANE_DISASSEMBLY		16	0.309094	0.997281	0.46748	0.713332	1	2925	tags=44%, list=15%, signal=51%
GO_REGULATION_OF_CELL_GROWTH_INVOLVED_IN_CARDIAC_MUSCLE_CELL_DEVELOPMENT	GO_REGULATION_OF_CELL_GROWTH_INVOLVED_IN_CARDIAC_MUSCLE_CELL_DEVELOPMENT		18	0.284335	0.957822	0.472477	0.764975	1	1782	tags=22%, list=9%, signal=24%
GO_NEGATIVE_REGULATION_OF_CALCIUM_ION_TRANSMEMBRANE_TRANSPORT	GO_NEGATIVE_REGULATION_OF_CALCIUM_ION_TRANSMEMBRANE_TRANSPORT		39	0.241639	0.994893	0.472868	0.717729	1	669	tags=13%, list=3%, signal=13%
GO_FATTY_ACID_DERIVATIVE_BINDING	GO_FATTY_ACID_DERIVATIVE_BINDING		27	0.258695	0.985377	0.473118	0.732092	1	1924	tags=26%, list=10%, signal=29%
GO_REGULATION_OF_VOLTAGE_GATED_CALCIUM_CHANNEL_ACTIVITY	GO_REGULATION_OF_VOLTAGE_GATED_CALCIUM_CHANNEL_ACTIVITY		39	0.224658	0.973546	0.480315	0.744611	1	659	tags=10%, list=3%, signal=11%
GO_CEREBRAL_CORTEX_NEURON_DIFFERENTIATION	GO_CEREBRAL_CORTEX_NEURON_DIFFERENTIATION		24	0.273015	1.01281	0.480874	0.697981	1	2508	tags=25%, list=13%, signal=29%
GO_ANTIGEN_PROCESSING_AND_PRESENTATION_OF_ENDOGENOUS_PEPTIDE_ANTIGEN	GO_ANTIGEN_PROCESSING_AND_PRESENTATION_OF_ENDOGENOUS_PEPTIDE_ANTIGEN		15	0.307296	0.957432	0.481482	0.764808	1	4061	tags=40%, list=20%, signal=50%
GO_REGULATION_OF_SENSORY_PERCEPTION	GO_REGULATION_OF_SENSORY_PERCEPTION		34	0.230027	0.948556	0.484849	0.778009	1	1761	tags=12%, list=9%, signal=13%
GO_MONONUCLEAR_CELL_DIFFERENTIATION	GO_MONONUCLEAR_CELL_DIFFERENTIATION		34	0.231835	0.963747	0.486667	0.759381	1	2921	tags=29%, list=15%, signal=34%
GO_ATRIAL_CARDIAC_MUSCLE_CELL_TO_AV_NODE_CELL_SIGNALING	GO_ATRIAL_CARDIAC_MUSCLE_CELL_TO_AV_NODE_CELL_SIGNALING		18	0.283854	0.982115	0.487562	0.735444	1	3086	tags=28%, list=16%, signal=33%
GO_DETECTION_OF_STIMULUS_INVOLVED_IN_SENSORY_PERCEPTION_OF_PAIN	GO_DETECTION_OF_STIMULUS_INVOLVED_IN_SENSORY_PERCEPTION_OF_PAIN		23	0.27182	0.974895	0.487805	0.742149	1	1367	tags=22%, list=7%, signal=23%
GO_EMBRYONIC_DIGESTIVE_TRACT_DEVELOPMENT	GO_EMBRYONIC_DIGESTIVE_TRACT_DEVELOPMENT		33	0.245879	0.991194	0.488	0.723056	1	1596	tags=15%, list=8%, signal=16%
GO_REGULATION_OF_LAMELLIPODIUM_ORGANIZATION	GO_REGULATION_OF_LAMELLIPODIUM_ORGANIZATION		37	0.242673	0.991391	0.488889	0.723752	1	2041	tags=22%, list=10%, signal=24%
GO_MAMMARY_GLAND_DUCT_MORPHOGENESIS	GO_MAMMARY_GLAND_DUCT_MORPHOGENESIS		32	0.239782	0.964495	0.489655	0.758634	1	1496	tags=19%, list=8%, signal=20%
GO_REGULATION_OF_ODONTOGENESIS	GO_REGULATION_OF_ODONTOGENESIS		24	0.260441	0.943139	0.489796	0.780532	1	3084	tags=25%, list=16%, signal=30%
GO_ENDOPLASMIC_RETICULUM_TO_CYTOSOL_TRANSPORT	GO_ENDOPLASMIC_RETICULUM_TO_CYTOSOL_TRANSPORT		26	0.263849	0.979417	0.491228	0.739382	1	2815	tags=27%, list=14%, signal=31%
GO_NEGATIVE_REGULATION_OF_TRANSCRIPTION_REGULATORY_REGION_DNA_BINDING	GO_NEGATIVE_REGULATION_OF_TRANSCRIPTION_REGULATORY_REGION_DNA_BINDING		21	0.27228	0.960312	0.491803	0.762836	1	2672	tags=29%, list=13%, signal=33%
GO_GLUTAMINE_FAMILY_AMINO_ACID_METABOLIC_PROCESS	GO_GLUTAMINE_FAMILY_AMINO_ACID_METABOLIC_PROCESS		68	0.213328	0.988226	0.493507	0.727652	1	755	tags=10%, list=4%, signal=11%
GO_ESTABLISHMENT_OF_EPITHELIAL_CELL_POLARITY	GO_ESTABLISHMENT_OF_EPITHELIAL_CELL_POLARITY		29	0.246674	0.970229	0.494318	0.751648	1	1967	tags=24%, list=10%, signal=27%
GO_NEGATIVE_REGULATION_OF_TYPE_I_INTERFERON_MEDIATED_SIGNALING_PATHWAY	GO_NEGATIVE_REGULATION_OF_TYPE_I_INTERFERON_MEDIATED_SIGNALING_PATHWAY		15	0.29483	0.981494	0.5	0.736027	1	1428	tags=13%, list=7%, signal=14%
GO_NEGATIVE_REGULATION_OF_T_HELPER_CELL_DIFFERENTIATION	GO_NEGATIVE_REGULATION_OF_T_HELPER_CELL_DIFFERENTIATION		16	0.288419	0.97184	0.5	0.748298	1	14110	tags=100%, list=71%, signal=347%
GO_POSITIVE_REGULATION_OF_CHEMOKINE_SECRETION	GO_POSITIVE_REGULATION_OF_CHEMOKINE_SECRETION		15	0.294058	0.967949	0.502392	0.752801	1	13998	tags=100%, list=71%, signal=340%
GO_ENDOCYTIC_PATCH	GO_ENDOCYTIC_PATCH		16	0.303839	0.990274	0.50495	0.724447	1	1531	tags=19%, list=8%, signal=20%
GO_RESPONSE_TO_GONADOTROPIN	GO_RESPONSE_TO_GONADOTROPIN		26	0.254498	0.978483	0.505495	0.738266	1	3330	tags=31%, list=17%, signal=37%
GO_POSITIVE_REGULATION_OF_DEPHOSPHORYLATION	GO_POSITIVE_REGULATION_OF_DEPHOSPHORYLATION		55	0.215676	0.958728	0.505495	0.764877	1	3187	tags=25%, list=16%, signal=30%
GO_CEREBELLAR_PURKINJE_CELL_LAYER_DEVELOPMENT	GO_CEREBELLAR_PURKINJE_CELL_LAYER_DEVELOPMENT		22	0.265992	0.958397	0.505747	0.76457	1	999	tags=14%, list=5%, signal=14%
GO_REGULATION_OF_SYNAPTIC_VESICLE_ENDOCYTOSIS	GO_REGULATION_OF_SYNAPTIC_VESICLE_ENDOCYTOSIS		17	0.274515	0.961968	0.507538	0.760552	1	1702	tags=24%, list=9%, signal=26%
GO_STRIATED_MUSCLE_ADAPTATION	GO_STRIATED_MUSCLE_ADAPTATION		45	0.230125	0.983315	0.508621	0.735664	1	3856	tags=33%, list=19%, signal=41%
GO_NADP_METABOLIC_PROCESS	GO_NADP_METABOLIC_PROCESS		28	0.25586	0.97855	0.511628	0.739309	1	3949	tags=43%, list=20%, signal=53%
GO_NEUTRAL_LIPID_BIOSYNTHETIC_PROCESS	GO_NEUTRAL_LIPID_BIOSYNTHETIC_PROCESS		36	0.240084	0.978293	0.515873	0.736345	1	3751	tags=33%, list=19%, signal=41%
GO_PHOSPHATIDYLINOSITOL_3_4_5_TRISPHOSPHATE_BINDING	GO_PHOSPHATIDYLINOSITOL_3_4_5_TRISPHOSPHATE_BINDING		38	0.230179	0.949829	0.517482	0.778295	1	1784	tags=18%, list=9%, signal=20%
GO_POSITIVE_REGULATION_OF_GLYCOPROTEIN_METABOLIC_PROCESS	GO_POSITIVE_REGULATION_OF_GLYCOPROTEIN_METABOLIC_PROCESS		22	0.261539	0.960148	0.518135	0.762083	1	2274	tags=23%, list=11%, signal=26%
GO_EXCRETION	GO_EXCRETION		61	0.215421	0.999077	0.518987	0.711907	1	2391	tags=21%, list=12%, signal=24%
GO_ADRENERGIC_RECEPTOR_SIGNALING_PATHWAY	GO_ADRENERGIC_RECEPTOR_SIGNALING_PATHWAY		31	0.242872	0.962719	0.519231	0.760996	1	3052	tags=23%, list=15%, signal=27%
GO_IMMUNE_RESPONSE_TO_TUMOR_CELL	GO_IMMUNE_RESPONSE_TO_TUMOR_CELL		15	0.291875	0.942104	0.521186	0.78199	1	1028	tags=20%, list=5%, signal=21%
GO_ADP_BINDING	GO_ADP_BINDING		33	0.232246	0.956473	0.522059	0.766281	1	2933	tags=27%, list=15%, signal=32%
GO_NEGATIVE_REGULATION_OF_EXTRINSIC_APOPTOTIC_SIGNALING_PATHWAY	GO_NEGATIVE_REGULATION_OF_EXTRINSIC_APOPTOTIC_SIGNALING_PATHWAY		101	0.199142	1.01232	0.522727	0.695553	1	2533	tags=22%, list=13%, signal=25%
GO_CARBONATE_DEHYDRATASE_ACTIVITY	GO_CARBONATE_DEHYDRATASE_ACTIVITY		15	0.282125	0.927931	0.522822	0.801601	1	5	tags=7%, list=0%, signal=7%
GO_XENOBIOTIC_TRANSPORT	GO_XENOBIOTIC_TRANSPORT		25	0.252848	0.969833	0.524324	0.751515	1	5411	tags=48%, list=27%, signal=66%
GO_PROTEIN_PHOSPHATASE_TYPE_2A_COMPLEX	GO_PROTEIN_PHOSPHATASE_TYPE_2A_COMPLEX		18	0.280785	0.965759	0.52451	0.756504	1	1686	tags=28%, list=9%, signal=30%
GO_NEGATIVE_REGULATION_OF_ENDOPLASMIC_RETICULUM_STRESS_INDUCED_INTRINSIC_APOPTOTIC_SIGNALING_PATHWAY	GO_NEGATIVE_REGULATION_OF_ENDOPLASMIC_RETICULUM_STRESS_INDUCED_INTRINSIC_APOPTOTIC_SIGNALING_PATHWAY		17	0.277981	0.945594	0.53	0.776278	1	2815	tags=35%, list=14%, signal=41%
GO_EXPLORATION_BEHAVIOR	GO_EXPLORATION_BEHAVIOR		24	0.248541	0.954186	0.538835	0.769947	1	3246	tags=29%, list=16%, signal=35%
GO_POSITIVE_REGULATION_OF_TOR_SIGNALING	GO_POSITIVE_REGULATION_OF_TOR_SIGNALING		34	0.245599	0.977351	0.539007	0.737794	1	4603	tags=47%, list=23%, signal=61%
GO_REGULATION_OF_HETEROTYPIC_CELL_CELL_ADHESION	GO_REGULATION_OF_HETEROTYPIC_CELL_CELL_ADHESION		25	0.23962	0.930733	0.543353	0.795643	1	2360	tags=24%, list=12%, signal=27%
GO_STARTLE_RESPONSE	GO_STARTLE_RESPONSE		26	0.243726	0.948785	0.550296	0.778609	1	2439	tags=19%, list=12%, signal=22%
GO_APICAL_JUNCTION_ASSEMBLY	GO_APICAL_JUNCTION_ASSEMBLY		61	0.197151	0.940943	0.551282	0.781303	1	2320	tags=20%, list=12%, signal=22%
GO_NEGATIVE_REGULATION_OF_VIRAL_RELEASE_FROM_HOST_CELL	GO_NEGATIVE_REGULATION_OF_VIRAL_RELEASE_FROM_HOST_CELL		15	0.295394	0.935317	0.553571	0.792358	1	1857	tags=27%, list=9%, signal=29%
GO_GLYCOSYLCERAMIDE_METABOLIC_PROCESS	GO_GLYCOSYLCERAMIDE_METABOLIC_PROCESS		19	0.270165	0.947952	0.557214	0.774788	1	2720	tags=32%, list=14%, signal=37%
GO_RESPONSE_TO_UV_C	GO_RESPONSE_TO_UV_C		16	0.284576	0.918128	0.55794	0.814801	1	3640	tags=44%, list=18%, signal=54%
GO_CATECHOLAMINE_UPTAKE	GO_CATECHOLAMINE_UPTAKE		15	0.282203	0.918936	0.562249	0.815237	1	659	tags=13%, list=3%, signal=14%
GO_NEGATIVE_REGULATION_OF_SUPRAMOLECULAR_FIBER_ORGANIZATION	GO_NEGATIVE_REGULATION_OF_SUPRAMOLECULAR_FIBER_ORGANIZATION		123	0.192794	0.969525	0.5625	0.749866	1	2029	tags=16%, list=10%, signal=18%
GO_LIGAND_ACTIVATED_TRANSCRIPTION_FACTOR_ACTIVITY	GO_LIGAND_ACTIVATED_TRANSCRIPTION_FACTOR_ACTIVITY		47	0.209886	0.953674	0.563107	0.770108	1	1556	tags=17%, list=8%, signal=18%
GO_SUBSTANTIA_NIGRA_DEVELOPMENT	GO_SUBSTANTIA_NIGRA_DEVELOPMENT		37	0.218817	0.943602	0.564935	0.780534	1	2904	tags=24%, list=15%, signal=28%
GO_POSITIVE_REGULATION_OF_OLIGODENDROCYTE_DIFFERENTIATION	GO_POSITIVE_REGULATION_OF_OLIGODENDROCYTE_DIFFERENTIATION		23	0.248557	0.9269	0.565657	0.803076	1	3558	tags=30%, list=18%, signal=37%
GO_RESPONSE_TO_CAFFEINE	GO_RESPONSE_TO_CAFFEINE		18	0.258911	0.932912	0.569307	0.796056	1	880	tags=17%, list=4%, signal=17%
GO_PYRIMIDINE_NUCLEOSIDE_TRIPHOSPHATE_BIOSYNTHETIC_PROCESS	GO_PYRIMIDINE_NUCLEOSIDE_TRIPHOSPHATE_BIOSYNTHETIC_PROCESS		18	0.273249	0.923738	0.570048	0.80774	1	2636	tags=28%, list=13%, signal=32%
GO_SODIUM_INDEPENDENT_ORGANIC_ANION_TRANSPORT	GO_SODIUM_INDEPENDENT_ORGANIC_ANION_TRANSPORT		16	0.268447	0.933176	0.572072	0.796656	1	1678	tags=19%, list=8%, signal=20%
GO_PROTON_TRANSPORTING_V_TYPE_ATPASE_COMPLEX	GO_PROTON_TRANSPORTING_V_TYPE_ATPASE_COMPLEX		26	0.245074	0.913253	0.573099	0.816427	1	1648	tags=19%, list=8%, signal=21%
GO_NUCLEOSIDE_TRIPHOSPHATE_METABOLIC_PROCESS	GO_NUCLEOSIDE_TRIPHOSPHATE_METABOLIC_PROCESS		81	0.194024	0.948496	0.573529	0.776946	1	2636	tags=20%, list=13%, signal=23%
GO_CORTICAL_CYTOSKELETON	GO_CORTICAL_CYTOSKELETON		111	0.190901	0.982263	0.575758	0.737576	1	1531	tags=14%, list=8%, signal=15%
GO_DIGESTIVE_SYSTEM_PROCESS	GO_DIGESTIVE_SYSTEM_PROCESS		97	0.191977	0.977294	0.578947	0.736731	1	2254	tags=15%, list=11%, signal=17%
GO_MHC_CLASS_I_PROTEIN_BINDING	GO_MHC_CLASS_I_PROTEIN_BINDING		16	0.276458	0.898679	0.581498	0.833576	1	2307	tags=25%, list=12%, signal=28%
GO_REGULATION_OF_BICELLULAR_TIGHT_JUNCTION_ASSEMBLY	GO_REGULATION_OF_BICELLULAR_TIGHT_JUNCTION_ASSEMBLY		22	0.252778	0.914533	0.581921	0.816858	1	2007	tags=18%, list=10%, signal=20%
GO_INNER_EAR_RECEPTOR_CELL_STEREOCILIUM_ORGANIZATION	GO_INNER_EAR_RECEPTOR_CELL_STEREOCILIUM_ORGANIZATION		26	0.238798	0.931946	0.582279	0.793728	1	1711	tags=19%, list=9%, signal=21%
GO_OLIGODENDROCYTE_DEVELOPMENT	GO_OLIGODENDROCYTE_DEVELOPMENT		42	0.211728	0.926496	0.582609	0.802932	1	2439	tags=24%, list=12%, signal=27%
GO_POSITIVE_REGULATION_OF_NEUROTRANSMITTER_SECRETION	GO_POSITIVE_REGULATION_OF_NEUROTRANSMITTER_SECRETION		22	0.254097	0.932438	0.586021	0.796123	1	2296	tags=23%, list=12%, signal=26%
GO_AMINO_ACID_BETAINE_METABOLIC_PROCESS	GO_AMINO_ACID_BETAINE_METABOLIC_PROCESS		17	0.267953	0.908329	0.587379	0.82045	1	2094	tags=29%, list=11%, signal=33%
GO_NEGATIVE_REGULATION_OF_DEFENSE_RESPONSE_TO_VIRUS	GO_NEGATIVE_REGULATION_OF_DEFENSE_RESPONSE_TO_VIRUS		21	0.242649	0.906004	0.587379	0.822659	1	3781	tags=43%, list=19%, signal=53%
GO_APOPTOTIC_PROCESS_INVOLVED_IN_MORPHOGENESIS	GO_APOPTOTIC_PROCESS_INVOLVED_IN_MORPHOGENESIS		24	0.248219	0.941386	0.587912	0.78251	1	2219	tags=25%, list=11%, signal=28%
GO_CARDIAC_MUSCLE_CELL_CONTRACTION	GO_CARDIAC_MUSCLE_CELL_CONTRACTION		67	0.199029	0.941167	0.588235	0.781923	1	1310	tags=12%, list=7%, signal=13%
GO_NUCLEOBASE_METABOLIC_PROCESS	GO_NUCLEOBASE_METABOLIC_PROCESS		35	0.221206	0.914827	0.590278	0.817359	1	2174	tags=23%, list=11%, signal=26%
GO_SODIUM_ION_HOMEOSTASIS	GO_SODIUM_ION_HOMEOSTASIS		51	0.212646	0.938108	0.590361	0.786243	1	1254	tags=12%, list=6%, signal=13%
GO_LIGASE_ACTIVITY_FORMING_CARBON_OXYGEN_BONDS	GO_LIGASE_ACTIVITY_FORMING_CARBON_OXYGEN_BONDS		21	0.254999	0.918106	0.591954	0.813636	1	2148	tags=29%, list=11%, signal=32%
GO_PHOSPHATIDIC_ACID_BINDING	GO_PHOSPHATIDIC_ACID_BINDING		18	0.2735	0.932184	0.593301	0.795571	1	2163	tags=28%, list=11%, signal=31%
GO_KERATAN_SULFATE_METABOLIC_PROCESS	GO_KERATAN_SULFATE_METABOLIC_PROCESS		33	0.230109	0.922194	0.594937	0.809375	1	2950	tags=30%, list=15%, signal=36%
GO_STEROID_BINDING	GO_STEROID_BINDING		92	0.196425	0.967152	0.595238	0.753792	1	1206	tags=13%, list=6%, signal=14%
GO_PROTEIN_KINASE_A_REGULATORY_SUBUNIT_BINDING	GO_PROTEIN_KINASE_A_REGULATORY_SUBUNIT_BINDING		20	0.252385	0.883045	0.596939	0.851854	1	4935	tags=45%, list=25%, signal=60%
GO_U2_SNRNP	GO_U2_SNRNP		18	0.263812	0.903835	0.599078	0.826924	1	2867	tags=28%, list=14%, signal=32%
GO_DNA_DAMAGE_RESPONSE_SIGNAL_TRANSDUCTION_RESULTING_IN_TRANSCRIPTION	GO_DNA_DAMAGE_RESPONSE_SIGNAL_TRANSDUCTION_RESULTING_IN_TRANSCRIPTION		18	0.261014	0.912664	0.600939	0.815534	1	880	tags=17%, list=4%, signal=17%
GO_ESTABLISHMENT_OF_PLANAR_POLARITY_INVOLVED_IN_NEURAL_TUBE_CLOSURE	GO_ESTABLISHMENT_OF_PLANAR_POLARITY_INVOLVED_IN_NEURAL_TUBE_CLOSURE		15	0.284078	0.897083	0.601852	0.833738	1	859	tags=13%, list=4%, signal=14%
GO_PROTEIN_TYROSINE_KINASE_ACTIVATOR_ACTIVITY	GO_PROTEIN_TYROSINE_KINASE_ACTIVATOR_ACTIVITY		17	0.255221	0.885909	0.60262	0.84969	1	3041	tags=41%, list=15%, signal=49%
GO_NEUROEPITHELIAL_CELL_DIFFERENTIATION	GO_NEUROEPITHELIAL_CELL_DIFFERENTIATION		51	0.210152	0.949986	0.604938	0.779121	1	3042	tags=27%, list=15%, signal=32%
GO_CELL_CELL_SIGNALING_INVOLVED_IN_CARDIAC_CONDUCTION	GO_CELL_CELL_SIGNALING_INVOLVED_IN_CARDIAC_CONDUCTION		29	0.232111	0.91496	0.605096	0.818287	1	3086	tags=24%, list=16%, signal=29%
GO_REGULATION_OF_THE_FORCE_OF_HEART_CONTRACTION	GO_REGULATION_OF_THE_FORCE_OF_HEART_CONTRACTION		26	0.252232	0.946508	0.605442	0.776204	1	297	tags=8%, list=1%, signal=8%
GO_MEMBRANE_DEPOLARIZATION	GO_MEMBRANE_DEPOLARIZATION		84	0.19297	0.946299	0.606061	0.775561	1	2597	tags=17%, list=13%, signal=19%
GO_EMBRYONIC_HINDLIMB_MORPHOGENESIS	GO_EMBRYONIC_HINDLIMB_MORPHOGENESIS		28	0.239418	0.946549	0.607692	0.777329	1	3408	tags=32%, list=17%, signal=39%
GO_NEGATIVE_REGULATION_OF_ANIMAL_ORGAN_MORPHOGENESIS	GO_NEGATIVE_REGULATION_OF_ANIMAL_ORGAN_MORPHOGENESIS		34	0.214064	0.910316	0.608392	0.819086	1	649	tags=9%, list=3%, signal=9%
GO_REGULATION_OF_VESICLE_FUSION	GO_REGULATION_OF_VESICLE_FUSION		29	0.232339	0.909265	0.609589	0.819342	1	653	tags=10%, list=3%, signal=11%
GO_POSTSYNAPTIC_CYTOSKELETON_ORGANIZATION	GO_POSTSYNAPTIC_CYTOSKELETON_ORGANIZATION		16	0.271199	0.903355	0.61165	0.826915	1	4365	tags=44%, list=22%, signal=56%
GO_NEGATIVE_REGULATION_OF_ACTIN_FILAMENT_BUNDLE_ASSEMBLY	GO_NEGATIVE_REGULATION_OF_ACTIN_FILAMENT_BUNDLE_ASSEMBLY		23	0.250651	0.922418	0.612717	0.810068	1	3411	tags=39%, list=17%, signal=47%
GO_VESICLE_MEDIATED_TRANSPORT_BETWEEN_ENDOSOMAL_COMPARTMENTS	GO_VESICLE_MEDIATED_TRANSPORT_BETWEEN_ENDOSOMAL_COMPARTMENTS		40	0.215012	0.912871	0.614173	0.81627	1	2034	tags=25%, list=10%, signal=28%
GO_REGULATION_OF_MEMBRANE_DEPOLARIZATION	GO_REGULATION_OF_MEMBRANE_DEPOLARIZATION		43	0.212292	0.916427	0.618182	0.816807	1	3254	tags=26%, list=16%, signal=31%
GO_RESPONSE_TO_TYPE_I_INTERFERON	GO_RESPONSE_TO_TYPE_I_INTERFERON		91	0.187087	0.940238	0.62	0.78192	1	2145	tags=15%, list=11%, signal=17%
GO_PRESYNAPTIC_ACTIVE_ZONE_CYTOPLASMIC_COMPONENT	GO_PRESYNAPTIC_ACTIVE_ZONE_CYTOPLASMIC_COMPONENT		16	0.254423	0.880175	0.620112	0.853742	1	2837	tags=25%, list=14%, signal=29%
GO_STEROL_TRANSPORTER_ACTIVITY	GO_STEROL_TRANSPORTER_ACTIVITY		22	0.248157	0.896053	0.622951	0.833636	1	2254	tags=23%, list=11%, signal=26%
GO_VITAMIN_B6_BINDING	GO_VITAMIN_B6_BINDING		45	0.215924	0.914126	0.623932	0.816643	1	1692	tags=18%, list=9%, signal=19%
GO_STRIATED_MUSCLE_CONTRACTION	GO_STRIATED_MUSCLE_CONTRACTION		165	0.181616	0.969553	0.625	0.751025	1	1310	tags=12%, list=7%, signal=12%
GO_REGULATION_OF_RHO_PROTEIN_SIGNAL_TRANSDUCTION	GO_REGULATION_OF_RHO_PROTEIN_SIGNAL_TRANSDUCTION		136	0.175414	0.948223	0.625	0.776494	1	2769	tags=18%, list=14%, signal=20%
GO_SUPEROXIDE_ANION_GENERATION	GO_SUPEROXIDE_ANION_GENERATION		35	0.227903	0.919589	0.625	0.814741	1	3012	tags=23%, list=15%, signal=27%
GO_TERTIARY_ALCOHOL_METABOLIC_PROCESS	GO_TERTIARY_ALCOHOL_METABOLIC_PROCESS		19	0.26393	0.908006	0.625668	0.820019	1	2287	tags=26%, list=12%, signal=30%
GO_PROTEIN_LIPID_COMPLEX_ASSEMBLY	GO_PROTEIN_LIPID_COMPLEX_ASSEMBLY		32	0.226229	0.932079	0.62987	0.794593	1	3068	tags=28%, list=15%, signal=33%
GO_REGULATION_OF_GLIAL_CELL_PROLIFERATION	GO_REGULATION_OF_GLIAL_CELL_PROLIFERATION		30	0.23269	0.894231	0.631206	0.835677	1	3330	tags=27%, list=17%, signal=32%
GO_POSITIVE_REGULATION_OF_NERVOUS_SYSTEM_PROCESS	GO_POSITIVE_REGULATION_OF_NERVOUS_SYSTEM_PROCESS		62	0.199838	0.91824	0.633803	0.815748	1	2971	tags=26%, list=15%, signal=30%
GO_PHOSPHATIDYLGLYCEROL_METABOLIC_PROCESS	GO_PHOSPHATIDYLGLYCEROL_METABOLIC_PROCESS		30	0.230499	0.90268	0.63473	0.82739	1	2282	tags=17%, list=12%, signal=19%
GO_DENTATE_GYRUS_DEVELOPMENT	GO_DENTATE_GYRUS_DEVELOPMENT		16	0.258024	0.885002	0.643725	0.849413	1	3340	tags=38%, list=17%, signal=45%
GO_NEGATIVE_REGULATION_OF_BEHAVIOR	GO_NEGATIVE_REGULATION_OF_BEHAVIOR		16	0.261577	0.864915	0.644144	0.873224	1	1770	tags=19%, list=9%, signal=21%
GO_C4_DICARBOXYLATE_TRANSPORT	GO_C4_DICARBOXYLATE_TRANSPORT		21	0.243402	0.879772	0.645161	0.852238	1	3200	tags=29%, list=16%, signal=34%
GO_WW_DOMAIN_BINDING	GO_WW_DOMAIN_BINDING		30	0.228076	0.881497	0.648649	0.854375	1	2379	tags=27%, list=12%, signal=30%
GO_ENTEROENDOCRINE_CELL_DIFFERENTIATION	GO_ENTEROENDOCRINE_CELL_DIFFERENTIATION		27	0.236097	0.912292	0.650888	0.815313	1	2533	tags=26%, list=13%, signal=30%
GO_POSITIVE_REGULATION_OF_EPITHELIAL_TO_MESENCHYMAL_TRANSITION	GO_POSITIVE_REGULATION_OF_EPITHELIAL_TO_MESENCHYMAL_TRANSITION		47	0.210492	0.913709	0.651685	0.816458	1	3630	tags=34%, list=18%, signal=42%
GO_INNER_EAR_RECEPTOR_CELL_DEVELOPMENT	GO_INNER_EAR_RECEPTOR_CELL_DEVELOPMENT		39	0.210385	0.890803	0.652893	0.84284	1	1711	tags=18%, list=9%, signal=20%
GO_NEGATIVE_REGULATION_OF_INTERLEUKIN_6_PRODUCTION	GO_NEGATIVE_REGULATION_OF_INTERLEUKIN_6_PRODUCTION		39	0.206055	0.877522	0.653226	0.855248	1	2304	tags=18%, list=12%, signal=20%
GO_REGULATION_OF_JUN_KINASE_ACTIVITY	GO_REGULATION_OF_JUN_KINASE_ACTIVITY		81	0.193615	0.947964	0.660377	0.775984	1	3058	tags=22%, list=15%, signal=26%
GO_REGULATION_OF_APPETITE	GO_REGULATION_OF_APPETITE		22	0.23563	0.868569	0.661376	0.870934	1	920	tags=14%, list=5%, signal=14%
GO_ESTABLISHMENT_OF_PLANAR_POLARITY_OF_EMBRYONIC_EPITHELIUM	GO_ESTABLISHMENT_OF_PLANAR_POLARITY_OF_EMBRYONIC_EPITHELIUM		17	0.253113	0.868738	0.664975	0.871786	1	859	tags=12%, list=4%, signal=12%
GO_REGULATION_OF_FAT_CELL_DIFFERENTIATION	GO_REGULATION_OF_FAT_CELL_DIFFERENTIATION		117	0.182451	0.955023	0.666667	0.768988	1	3505	tags=27%, list=18%, signal=33%
GO_ACID_THIOL_LIGASE_ACTIVITY	GO_ACID_THIOL_LIGASE_ACTIVITY		29	0.230539	0.885867	0.675	0.848595	1	425	tags=10%, list=2%, signal=11%
GO_NEGATIVE_REGULATION_OF_COLD_INDUCED_THERMOGENESIS	GO_NEGATIVE_REGULATION_OF_COLD_INDUCED_THERMOGENESIS		46	0.201668	0.888347	0.675439	0.845075	1	1128	tags=15%, list=6%, signal=16%
GO_NOTCH_BINDING	GO_NOTCH_BINDING		22	0.244862	0.879836	0.677019	0.85328	1	1522	tags=18%, list=8%, signal=20%
GO_NUCLEOBASE_CONTAINING_SMALL_MOLECULE_INTERCONVERSION	GO_NUCLEOBASE_CONTAINING_SMALL_MOLECULE_INTERCONVERSION		27	0.216712	0.861658	0.677852	0.877855	1	2875	tags=22%, list=15%, signal=26%
GO_PROTEIN_HOMOTRIMERIZATION	GO_PROTEIN_HOMOTRIMERIZATION		29	0.219989	0.894434	0.678322	0.836393	1	2299	tags=24%, list=12%, signal=27%
GO_ADAPTATION_OF_SIGNALING_PATHWAY	GO_ADAPTATION_OF_SIGNALING_PATHWAY		20	0.253391	0.88035	0.678733	0.854546	1	2183	tags=25%, list=11%, signal=28%
GO_NEGATIVE_REGULATION_OF_NOTCH_SIGNALING_PATHWAY	GO_NEGATIVE_REGULATION_OF_NOTCH_SIGNALING_PATHWAY		39	0.205161	0.888556	0.679688	0.845794	1	2165	tags=18%, list=11%, signal=20%
GO_POSITIVE_REGULATION_OF_CYTOKINE_PRODUCTION_INVOLVED_IN_INFLAMMATORY_RESPONSE	GO_POSITIVE_REGULATION_OF_CYTOKINE_PRODUCTION_INVOLVED_IN_INFLAMMATORY_RESPONSE		17	0.252829	0.853364	0.682927	0.887277	1	3872	tags=35%, list=20%, signal=44%
GO_NUCLEOBASE_BIOSYNTHETIC_PROCESS	GO_NUCLEOBASE_BIOSYNTHETIC_PROCESS		19	0.248364	0.857945	0.683258	0.882236	1	2174	tags=26%, list=11%, signal=30%
GO_NEGATIVE_REGULATION_OF_SMOOTH_MUSCLE_CELL_MIGRATION	GO_NEGATIVE_REGULATION_OF_SMOOTH_MUSCLE_CELL_MIGRATION		22	0.242284	0.867907	0.683908	0.871305	1	3474	tags=36%, list=18%, signal=44%
GO_MIDBRAIN_DEVELOPMENT	GO_MIDBRAIN_DEVELOPMENT		83	0.182963	0.924168	0.6875	0.807815	1	3923	tags=28%, list=20%, signal=34%
GO_ACTININ_BINDING	GO_ACTININ_BINDING		38	0.215616	0.915694	0.690141	0.817605	1	2868	tags=24%, list=14%, signal=28%
GO_REGULATION_OF_NON_CANONICAL_WNT_SIGNALING_PATHWAY	GO_REGULATION_OF_NON_CANONICAL_WNT_SIGNALING_PATHWAY		23	0.223723	0.855141	0.694268	0.885885	1	3823	tags=35%, list=19%, signal=43%
GO_QUATERNARY_AMMONIUM_GROUP_BINDING	GO_QUATERNARY_AMMONIUM_GROUP_BINDING		27	0.233116	0.900809	0.695122	0.829584	1	1514	tags=19%, list=8%, signal=20%
GO_REGULATION_OF_DEVELOPMENTAL_PIGMENTATION	GO_REGULATION_OF_DEVELOPMENTAL_PIGMENTATION		15	0.255534	0.834948	0.695455	0.911723	1	1480	tags=20%, list=7%, signal=22%
GO_NEGATIVE_REGULATION_OF_RESPONSE_TO_ENDOPLASMIC_RETICULUM_STRESS	GO_NEGATIVE_REGULATION_OF_RESPONSE_TO_ENDOPLASMIC_RETICULUM_STRESS		40	0.213243	0.89635	0.698413	0.834177	1	2815	tags=25%, list=14%, signal=29%
GO_RESPONSE_TO_THYROID_HORMONE	GO_RESPONSE_TO_THYROID_HORMONE		25	0.227241	0.864957	0.700535	0.874334	1	3589	tags=28%, list=18%, signal=34%
GO_TOLL_LIKE_RECEPTOR_9_SIGNALING_PATHWAY	GO_TOLL_LIKE_RECEPTOR_9_SIGNALING_PATHWAY		23	0.228972	0.860484	0.701087	0.879144	1	3003	tags=22%, list=15%, signal=26%
GO_ORGANIC_HYDROXY_COMPOUND_CATABOLIC_PROCESS	GO_ORGANIC_HYDROXY_COMPOUND_CATABOLIC_PROCESS		69	0.184325	0.883653	0.701493	0.851617	1	3143	tags=26%, list=16%, signal=31%
GO_RESPONSE_TO_UV_B	GO_RESPONSE_TO_UV_B		18	0.254067	0.848789	0.704762	0.891076	1	880	tags=17%, list=4%, signal=17%
GO_PROTEIN_CATABOLIC_PROCESS_IN_THE_VACUOLE	GO_PROTEIN_CATABOLIC_PROCESS_IN_THE_VACUOLE		15	0.260831	0.837649	0.705628	0.908823	1	2982	tags=33%, list=15%, signal=39%
GO_OXIDOREDUCTASE_ACTIVITY_ACTING_ON_A_SULFUR_GROUP_OF_DONORS	GO_OXIDOREDUCTASE_ACTIVITY_ACTING_ON_A_SULFUR_GROUP_OF_DONORS		53	0.199153	0.897815	0.707071	0.833262	1	3959	tags=32%, list=20%, signal=40%
GO_CELLULAR_RESPONSE_TO_GONADOTROPIN_STIMULUS	GO_CELLULAR_RESPONSE_TO_GONADOTROPIN_STIMULUS		17	0.248452	0.838709	0.709845	0.907848	1	5121	tags=53%, list=26%, signal=71%
GO_REGULATION_OF_DEFENSE_RESPONSE_TO_BACTERIUM	GO_REGULATION_OF_DEFENSE_RESPONSE_TO_BACTERIUM		17	0.255398	0.85394	0.710407	0.88723	1	4740	tags=53%, list=24%, signal=70%
GO_PYRIMIDINE_NUCLEOSIDE_TRIPHOSPHATE_METABOLIC_PROCESS	GO_PYRIMIDINE_NUCLEOSIDE_TRIPHOSPHATE_METABOLIC_PROCESS		21	0.239318	0.866762	0.710983	0.872747	1	2636	tags=24%, list=13%, signal=27%
GO_OSTEOCLAST_DEVELOPMENT	GO_OSTEOCLAST_DEVELOPMENT		19	0.235435	0.836424	0.712195	0.910051	1	4482	tags=53%, list=23%, signal=68%
GO_NEGATIVE_REGULATION_OF_RESPONSE_TO_BIOTIC_STIMULUS	GO_NEGATIVE_REGULATION_OF_RESPONSE_TO_BIOTIC_STIMULUS		87	0.188521	0.909837	0.714286	0.819089	1	2529	tags=22%, list=13%, signal=25%
GO_POSITIVE_REGULATION_OF_FATTY_ACID_TRANSPORT	GO_POSITIVE_REGULATION_OF_FATTY_ACID_TRANSPORT		17	0.235829	0.812021	0.714286	0.923923	1	1128	tags=12%, list=6%, signal=12%
GO_NEGATIVE_REGULATION_OF_TUMOR_NECROSIS_FACTOR_MEDIATED_SIGNALING_PATHWAY	GO_NEGATIVE_REGULATION_OF_TUMOR_NECROSIS_FACTOR_MEDIATED_SIGNALING_PATHWAY		18	0.248937	0.840232	0.717703	0.906021	1	1873	tags=22%, list=9%, signal=25%
GO_CHAPERONE_MEDIATED_AUTOPHAGY	GO_CHAPERONE_MEDIATED_AUTOPHAGY		16	0.244593	0.819781	0.720183	0.919847	1	2111	tags=25%, list=11%, signal=28%
GO_N_GLYCAN_PROCESSING	GO_N_GLYCAN_PROCESSING		15	0.259396	0.820179	0.727273	0.921584	1	4263	tags=47%, list=22%, signal=59%
GO_NEGATIVE_REGULATION_OF_BONE_REMODELING	GO_NEGATIVE_REGULATION_OF_BONE_REMODELING		15	0.254834	0.820158	0.731915	0.920407	1	14775	tags=100%, list=75%, signal=392%
GO_FILOPODIUM_ASSEMBLY	GO_FILOPODIUM_ASSEMBLY		55	0.189126	0.858838	0.733333	0.881603	1	3630	tags=25%, list=18%, signal=31%
GO_GLYCOSIDE_METABOLIC_PROCESS	GO_GLYCOSIDE_METABOLIC_PROCESS		20	0.242872	0.833274	0.733333	0.91261	1	2720	tags=25%, list=14%, signal=29%
GO_HYDROGEN_PEROXIDE_BIOSYNTHETIC_PROCESS	GO_HYDROGEN_PEROXIDE_BIOSYNTHETIC_PROCESS		15	0.253583	0.827652	0.73494	0.919867	1	3154	tags=33%, list=16%, signal=40%
GO_PYRIMIDINE_NUCLEOBASE_METABOLIC_PROCESS	GO_PYRIMIDINE_NUCLEOBASE_METABOLIC_PROCESS		16	0.257885	0.818324	0.735683	0.921201	1	755	tags=13%, list=4%, signal=13%
GO_GTP_DEPENDENT_PROTEIN_BINDING	GO_GTP_DEPENDENT_PROTEIN_BINDING		23	0.22973	0.850222	0.736559	0.889284	1	4495	tags=43%, list=23%, signal=56%
GO_REGULATION_OF_ACROSOME_REACTION	GO_REGULATION_OF_ACROSOME_REACTION		17	0.242284	0.789826	0.736585	0.937574	1	4134	tags=29%, list=21%, signal=37%
GO_ENDOCRINE_PANCREAS_DEVELOPMENT	GO_ENDOCRINE_PANCREAS_DEVELOPMENT		45	0.200321	0.86997	0.736842	0.870136	1	2533	tags=22%, list=13%, signal=25%
GO_POSITIVE_REGULATION_OF_MACROPHAGE_MIGRATION	GO_POSITIVE_REGULATION_OF_MACROPHAGE_MIGRATION		21	0.236351	0.81429	0.740933	0.924685	1	2690	tags=29%, list=14%, signal=33%
GO_CLATHRIN_COATED_ENDOCYTIC_VESICLE	GO_CLATHRIN_COATED_ENDOCYTIC_VESICLE		55	0.200328	0.880932	0.741573	0.854424	1	2011	tags=18%, list=10%, signal=20%
GO_TERMINAL_BOUTON	GO_TERMINAL_BOUTON		52	0.202149	0.889373	0.745098	0.845065	1	1939	tags=17%, list=10%, signal=19%
GO_POSITIVE_REGULATION_OF_POSTTRANSCRIPTIONAL_GENE_SILENCING	GO_POSITIVE_REGULATION_OF_POSTTRANSCRIPTIONAL_GENE_SILENCING		23	0.23057	0.833807	0.745562	0.912714	1	3582	tags=30%, list=18%, signal=37%
GO_REGULATION_OF_CELL_MATURATION	GO_REGULATION_OF_CELL_MATURATION		22	0.222106	0.820922	0.745856	0.92263	1	4146	tags=41%, list=21%, signal=52%
GO_TETRAHYDROFOLATE_METABOLIC_PROCESS	GO_TETRAHYDROFOLATE_METABOLIC_PROCESS		17	0.238364	0.801297	0.747525	0.931769	1	2940	tags=29%, list=15%, signal=35%
GO_POST_ANAL_TAIL_MORPHOGENESIS	GO_POST_ANAL_TAIL_MORPHOGENESIS		17	0.2331	0.781987	0.747826	0.943741	1	2985	tags=24%, list=15%, signal=28%
GO_RESPONSE_TO_AUDITORY_STIMULUS	GO_RESPONSE_TO_AUDITORY_STIMULUS		25	0.215524	0.806371	0.757396	0.926742	1	1407	tags=16%, list=7%, signal=17%
GO_METALLOCARBOXYPEPTIDASE_ACTIVITY	GO_METALLOCARBOXYPEPTIDASE_ACTIVITY		28	0.209955	0.812988	0.758823	0.9246	1	702	tags=11%, list=4%, signal=11%
GO_PROTEOGLYCAN_METABOLIC_PROCESS	GO_PROTEOGLYCAN_METABOLIC_PROCESS		87	0.177087	0.89782	0.759259	0.834453	1	1402	tags=11%, list=7%, signal=12%
GO_REGULATION_OF_FATTY_ACID_TRANSPORT	GO_REGULATION_OF_FATTY_ACID_TRANSPORT		24	0.220587	0.813329	0.760479	0.925186	1	1128	tags=13%, list=6%, signal=13%
GO_DENDRITE_SELF_AVOIDANCE	GO_DENDRITE_SELF_AVOIDANCE		16	0.225985	0.778217	0.762115	0.944467	1	2924	tags=25%, list=15%, signal=29%
GO_AXON_INITIAL_SEGMENT	GO_AXON_INITIAL_SEGMENT		18	0.239021	0.806489	0.762626	0.927719	1	669	tags=11%, list=3%, signal=11%
GO_ESTROGEN_METABOLIC_PROCESS	GO_ESTROGEN_METABOLIC_PROCESS		32	0.209457	0.826928	0.763359	0.919979	1	3897	tags=28%, list=20%, signal=35%
GO_NEGATIVE_REGULATION_OF_PHAGOCYTOSIS	GO_NEGATIVE_REGULATION_OF_PHAGOCYTOSIS		17	0.235309	0.807651	0.764706	0.926794	1	3053	tags=24%, list=15%, signal=28%
GO_MELANOCYTE_DIFFERENTIATION	GO_MELANOCYTE_DIFFERENTIATION		25	0.214281	0.802097	0.767568	0.931689	1	2921	tags=24%, list=15%, signal=28%
GO_POSITIVE_REGULATION_OF_FATTY_ACID_METABOLIC_PROCESS	GO_POSITIVE_REGULATION_OF_FATTY_ACID_METABOLIC_PROCESS		34	0.200445	0.82441	0.77037	0.922182	1	1577	tags=15%, list=8%, signal=16%
GO_SODIUM_ION_IMPORT_ACROSS_PLASMA_MEMBRANE	GO_SODIUM_ION_IMPORT_ACROSS_PLASMA_MEMBRANE		15	0.247292	0.801091	0.77193	0.93094	1	4400	tags=40%, list=22%, signal=51%
GO_PEPTIDOGLYCAN_BINDING	GO_PEPTIDOGLYCAN_BINDING		15	0.244563	0.792233	0.773504	0.937294	1	2470	tags=27%, list=12%, signal=30%
GO_PROTEIN_DISULFIDE_OXIDOREDUCTASE_ACTIVITY	GO_PROTEIN_DISULFIDE_OXIDOREDUCTASE_ACTIVITY		19	0.228304	0.783639	0.777251	0.942329	1	2659	tags=21%, list=13%, signal=24%
GO_NEGATIVE_REGULATION_OF_CYTOKINE_BIOSYNTHETIC_PROCESS	GO_NEGATIVE_REGULATION_OF_CYTOKINE_BIOSYNTHETIC_PROCESS		31	0.207703	0.829824	0.77931	0.916999	1	1517	tags=13%, list=8%, signal=14%
GO_ETHANOL_METABOLIC_PROCESS	GO_ETHANOL_METABOLIC_PROCESS		19	0.224355	0.794167	0.786802	0.937768	1	3421	tags=26%, list=17%, signal=32%
GO_GLYCOPROTEIN_CATABOLIC_PROCESS	GO_GLYCOPROTEIN_CATABOLIC_PROCESS		22	0.223784	0.8128	0.787565	0.923732	1	368	tags=9%, list=2%, signal=9%
GO_LOW_DENSITY_LIPOPROTEIN_RECEPTOR_PARTICLE_METABOLIC_PROCESS	GO_LOW_DENSITY_LIPOPROTEIN_RECEPTOR_PARTICLE_METABOLIC_PROCESS		24	0.206041	0.784464	0.788044	0.942256	1	2475	tags=21%, list=12%, signal=24%
GO_CELL_ADHESION_MEDIATOR_ACTIVITY	GO_CELL_ADHESION_MEDIATOR_ACTIVITY		59	0.174589	0.850556	0.789474	0.889737	1	2924	tags=22%, list=15%, signal=26%
GO_REGULATION_OF_MUSCLE_HYPERTROPHY	GO_REGULATION_OF_MUSCLE_HYPERTROPHY		57	0.18989	0.870348	0.791209	0.87049	1	3530	tags=26%, list=18%, signal=32%
GO_LYSINE_N_METHYLTRANSFERASE_ACTIVITY	GO_LYSINE_N_METHYLTRANSFERASE_ACTIVITY		42	0.197033	0.845894	0.793388	0.895927	1	4428	tags=36%, list=22%, signal=46%
GO_POLYOL_CATABOLIC_PROCESS	GO_POLYOL_CATABOLIC_PROCESS		22	0.219083	0.790872	0.793814	0.937082	1	2498	tags=27%, list=13%, signal=31%
GO_POSITIVE_REGULATION_OF_CHOLESTEROL_EFFLUX	GO_POSITIVE_REGULATION_OF_CHOLESTEROL_EFFLUX		16	0.229284	0.759578	0.795349	0.962797	1	666	tags=13%, list=3%, signal=13%
GO_VENTRAL_SPINAL_CORD_INTERNEURON_DIFFERENTIATION	GO_VENTRAL_SPINAL_CORD_INTERNEURON_DIFFERENTIATION		17	0.231457	0.767471	0.795455	0.955353	1	2521	tags=24%, list=13%, signal=27%
GO_ESTABLISHMENT_OR_MAINTENANCE_OF_CYTOSKELETON_POLARITY	GO_ESTABLISHMENT_OR_MAINTENANCE_OF_CYTOSKELETON_POLARITY		18	0.220701	0.750075	0.800948	0.970208	1	5315	tags=50%, list=27%, signal=68%
GO_C21_STEROID_HORMONE_METABOLIC_PROCESS	GO_C21_STEROID_HORMONE_METABOLIC_PROCESS		38	0.194821	0.793517	0.80315	0.937594	1	2373	tags=18%, list=12%, signal=21%
GO_FATTY_ACID_BETA_OXIDATION_USING_ACYL_COA_OXIDASE	GO_FATTY_ACID_BETA_OXIDATION_USING_ACYL_COA_OXIDASE		15	0.228845	0.752407	0.804688	0.968477	1	2078	tags=20%, list=10%, signal=22%
GO_NEURON_PROJECTION_ARBORIZATION	GO_NEURON_PROJECTION_ARBORIZATION		22	0.19964	0.754181	0.80829	0.96736	1	1220	tags=14%, list=6%, signal=15%
GO_DEOXYRIBONUCLEOSIDE_TRIPHOSPHATE_METABOLIC_PROCESS	GO_DEOXYRIBONUCLEOSIDE_TRIPHOSPHATE_METABOLIC_PROCESS		16	0.230614	0.74131	0.808511	0.978438	1	15255	tags=100%, list=77%, signal=434%
GO_PLATELET_ALPHA_GRANULE_LUMEN	GO_PLATELET_ALPHA_GRANULE_LUMEN		66	0.172124	0.820895	0.811594	0.921447	1	2392	tags=17%, list=12%, signal=19%
GO_POSITIVE_REGULATION_OF_AMINE_TRANSPORT	GO_POSITIVE_REGULATION_OF_AMINE_TRANSPORT		33	0.201994	0.831939	0.81295	0.914035	1	659	tags=12%, list=3%, signal=13%
GO_NEUROMUSCULAR_JUNCTION_DEVELOPMENT	GO_NEUROMUSCULAR_JUNCTION_DEVELOPMENT		48	0.188288	0.853271	0.813559	0.886292	1	2097	tags=17%, list=11%, signal=19%
GO_HIPPO_SIGNALING	GO_HIPPO_SIGNALING		38	0.192891	0.821964	0.813559	0.92184	1	3743	tags=32%, list=19%, signal=39%
GO_REGULATION_OF_SYNAPTIC_VESICLE_CYCLE	GO_REGULATION_OF_SYNAPTIC_VESICLE_CYCLE		111	0.172961	0.902318	0.814815	0.827077	1	2439	tags=19%, list=12%, signal=21%
GO_REGULATION_OF_CATECHOLAMINE_METABOLIC_PROCESS	GO_REGULATION_OF_CATECHOLAMINE_METABOLIC_PROCESS		19	0.226074	0.792254	0.81592	0.938437	1	3755	tags=32%, list=19%, signal=39%
GO_NEGATIVE_REGULATION_OF_CELL_JUNCTION_ASSEMBLY	GO_NEGATIVE_REGULATION_OF_CELL_JUNCTION_ASSEMBLY		23	0.21513	0.768899	0.817204	0.954647	1	3830	tags=43%, list=19%, signal=54%
GO_CATECHOLAMINE_BINDING	GO_CATECHOLAMINE_BINDING		19	0.225347	0.778753	0.818182	0.946074	1	15360	tags=100%, list=77%, signal=444%
GO_LIPID_TRANSFER_ACTIVITY	GO_LIPID_TRANSFER_ACTIVITY		38	0.198532	0.807908	0.818966	0.928769	1	807	tags=11%, list=4%, signal=11%
GO_REGULATION_OF_HEART_RATE	GO_REGULATION_OF_HEART_RATE		90	0.169329	0.855656	0.82	0.88597	1	1732	tags=13%, list=9%, signal=15%
GO_ACTIVIN_RECEPTOR_SIGNALING_PATHWAY	GO_ACTIVIN_RECEPTOR_SIGNALING_PATHWAY		42	0.185962	0.788797	0.823009	0.937957	1	3630	tags=26%, list=18%, signal=32%
GO_REGULATION_OF_RENAL_SYSTEM_PROCESS	GO_REGULATION_OF_RENAL_SYSTEM_PROCESS		34	0.198448	0.797226	0.824242	0.934963	1	3143	tags=26%, list=16%, signal=31%
GO_NITRIC_OXIDE_MEDIATED_SIGNAL_TRANSDUCTION	GO_NITRIC_OXIDE_MEDIATED_SIGNAL_TRANSDUCTION		27	0.207585	0.809048	0.825	0.927883	1	737	tags=11%, list=4%, signal=12%
GO_CELL_COMMUNICATION_INVOLVED_IN_CARDIAC_CONDUCTION	GO_CELL_COMMUNICATION_INVOLVED_IN_CARDIAC_CONDUCTION		52	0.183804	0.826425	0.827586	0.919673	1	455	tags=8%, list=2%, signal=8%
GO_NEGATIVE_REGULATION_OF_TUMOR_NECROSIS_FACTOR_SUPERFAMILY_CYTOKINE_PRODUCTION	GO_NEGATIVE_REGULATION_OF_TUMOR_NECROSIS_FACTOR_SUPERFAMILY_CYTOKINE_PRODUCTION		56	0.182979	0.822139	0.829787	0.922694	1	2373	tags=21%, list=12%, signal=24%
GO_POSITIVE_REGULATION_OF_ERBB_SIGNALING_PATHWAY	GO_POSITIVE_REGULATION_OF_ERBB_SIGNALING_PATHWAY		30	0.205279	0.80437	0.832258	0.928999	1	2660	tags=27%, list=13%, signal=31%
GO_REGULATION_OF_SUPEROXIDE_METABOLIC_PROCESS	GO_REGULATION_OF_SUPEROXIDE_METABOLIC_PROCESS		33	0.197961	0.788776	0.836478	0.936794	1	3012	tags=24%, list=15%, signal=29%
GO_REGULATION_OF_TOLL_LIKE_RECEPTOR_SIGNALING_PATHWAY	GO_REGULATION_OF_TOLL_LIKE_RECEPTOR_SIGNALING_PATHWAY		65	0.174525	0.816287	0.838384	0.923685	1	2885	tags=20%, list=15%, signal=23%
GO_REGULATION_OF_GLIOGENESIS	GO_REGULATION_OF_GLIOGENESIS		114	0.173989	0.90751	0.83871	0.820073	1	3038	tags=24%, list=15%, signal=28%
GO_REGULATION_OF_ICOSANOID_SECRETION	GO_REGULATION_OF_ICOSANOID_SECRETION		18	0.211627	0.744906	0.839196	0.975302	1	1128	tags=11%, list=6%, signal=12%
GO_EPIDERMAL_GROWTH_FACTOR_RECEPTOR_SIGNALING_PATHWAY	GO_EPIDERMAL_GROWTH_FACTOR_RECEPTOR_SIGNALING_PATHWAY		112	0.175419	0.879453	0.84	0.851832	1	1810	tags=15%, list=9%, signal=17%
GO_STEROL_TRANSPORT	GO_STEROL_TRANSPORT		85	0.176302	0.865488	0.84	0.874355	1	2373	tags=20%, list=12%, signal=23%
GO_THYROID_HORMONE_METABOLIC_PROCESS	GO_THYROID_HORMONE_METABOLIC_PROCESS		23	0.198475	0.722858	0.840426	0.979525	1	15893	tags=100%, list=80%, signal=504%
GO_SYNAPTONEMAL_COMPLEX_ORGANIZATION	GO_SYNAPTONEMAL_COMPLEX_ORGANIZATION		19	0.217456	0.738498	0.842593	0.976958	1	1121	tags=16%, list=6%, signal=17%
GO_STRUCTURAL_CONSTITUENT_OF_SYNAPSE	GO_STRUCTURAL_CONSTITUENT_OF_SYNAPSE		17	0.213742	0.739794	0.843478	0.976572	1	4071	tags=41%, list=21%, signal=52%
GO_NEGATIVE_REGULATION_OF_RECEPTOR_MEDIATED_ENDOCYTOSIS	GO_NEGATIVE_REGULATION_OF_RECEPTOR_MEDIATED_ENDOCYTOSIS		24	0.20822	0.76061	0.84492	0.962464	1	2873	tags=29%, list=14%, signal=34%
GO_NUCLEOSIDE_MONOPHOSPHATE_METABOLIC_PROCESS	GO_NUCLEOSIDE_MONOPHOSPHATE_METABOLIC_PROCESS		67	0.177785	0.822419	0.84507	0.923427	1	2636	tags=22%, list=13%, signal=26%
GO_IONOTROPIC_GLUTAMATE_RECEPTOR_BINDING	GO_IONOTROPIC_GLUTAMATE_RECEPTOR_BINDING		27	0.192439	0.761067	0.846154	0.963063	1	1307	tags=15%, list=7%, signal=16%
GO_RETINOID_X_RECEPTOR_BINDING	GO_RETINOID_X_RECEPTOR_BINDING		18	0.210189	0.722903	0.851852	0.980683	1	1753	tags=17%, list=9%, signal=18%
GO_SIALYLATION	GO_SIALYLATION		20	0.205018	0.735967	0.852041	0.978587	1	2135	tags=20%, list=11%, signal=22%
GO_MYELOID_DENDRITIC_CELL_DIFFERENTIATION	GO_MYELOID_DENDRITIC_CELL_DIFFERENTIATION		18	0.207765	0.700007	0.852041	0.986328	1	15708	tags=100%, list=79%, signal=481%
GO_NEGATIVE_REGULATION_OF_G_PROTEIN_COUPLED_RECEPTOR_SIGNALING_PATHWAY	GO_NEGATIVE_REGULATION_OF_G_PROTEIN_COUPLED_RECEPTOR_SIGNALING_PATHWAY		46	0.185978	0.800012	0.860656	0.931599	1	985	tags=11%, list=5%, signal=11%
GO_S100_PROTEIN_BINDING	GO_S100_PROTEIN_BINDING		15	0.233591	0.734672	0.863071	0.978827	1	3904	tags=40%, list=20%, signal=50%
GO_REGULATION_OF_SYNAPSE_ASSEMBLY	GO_REGULATION_OF_SYNAPSE_ASSEMBLY		100	0.167045	0.863208	0.863636	0.875774	1	1562	tags=13%, list=8%, signal=14%
GO_CYTOSKELETAL_ADAPTOR_ACTIVITY	GO_CYTOSKELETAL_ADAPTOR_ACTIVITY		15	0.226714	0.701384	0.867924	0.987495	1	2212	tags=27%, list=11%, signal=30%
GO_POSITIVE_REGULATION_OF_CELL_MATRIX_ADHESION	GO_POSITIVE_REGULATION_OF_CELL_MATRIX_ADHESION		51	0.181444	0.823512	0.868132	0.922576	1	2271	tags=20%, list=11%, signal=22%
GO_NEGATIVE_REGULATION_OF_CHEMOKINE_PRODUCTION	GO_NEGATIVE_REGULATION_OF_CHEMOKINE_PRODUCTION		18	0.212982	0.723309	0.869159	0.98145	1	2862	tags=17%, list=14%, signal=19%
GO_SODIUM_INDEPENDENT_ORGANIC_ANION_TRANSMEMBRANE_TRANSPORTER_ACTIVITY	GO_SODIUM_INDEPENDENT_ORGANIC_ANION_TRANSMEMBRANE_TRANSPORTER_ACTIVITY		16	0.211255	0.722054	0.872146	0.979182	1	1063	tags=13%, list=5%, signal=13%
GO_INTRINSIC_COMPONENT_OF_PRESYNAPTIC_MEMBRANE	GO_INTRINSIC_COMPONENT_OF_PRESYNAPTIC_MEMBRANE		82	0.169213	0.807773	0.875	0.92779	1	2429	tags=15%, list=12%, signal=17%
GO_REGULATION_OF_LIPOPROTEIN_LIPASE_ACTIVITY	GO_REGULATION_OF_LIPOPROTEIN_LIPASE_ACTIVITY		21	0.202492	0.718097	0.875	0.978375	1	666	tags=10%, list=3%, signal=10%
GO_CELLULAR_SODIUM_ION_HOMEOSTASIS	GO_CELLULAR_SODIUM_ION_HOMEOSTASIS		17	0.209024	0.714827	0.878378	0.980436	1	248	tags=6%, list=1%, signal=6%
GO_POSITIVE_REGULATION_OF_LONG_TERM_SYNAPTIC_POTENTIATION	GO_POSITIVE_REGULATION_OF_LONG_TERM_SYNAPTIC_POTENTIATION		21	0.20268	0.730586	0.883178	0.979733	1	2296	tags=19%, list=12%, signal=22%
GO_CELLULAR_RESPONSE_TO_ZINC_ION	GO_CELLULAR_RESPONSE_TO_ZINC_ION		18	0.218267	0.729662	0.884793	0.978351	1	2373	tags=22%, list=12%, signal=25%
GO_POSITIVE_REGULATION_OF_T_HELPER_1_TYPE_IMMUNE_RESPONSE	GO_POSITIVE_REGULATION_OF_T_HELPER_1_TYPE_IMMUNE_RESPONSE		18	0.21025	0.720341	0.885714	0.97973	1	838	tags=11%, list=4%, signal=12%
GO_RESPONSE_TO_MORPHINE	GO_RESPONSE_TO_MORPHINE		32	0.194144	0.779157	0.888199	0.946674	1	1328	tags=16%, list=7%, signal=17%
GO_DEVELOPMENTAL_PIGMENTATION	GO_DEVELOPMENTAL_PIGMENTATION		46	0.181271	0.796351	0.89	0.935337	1	3765	tags=28%, list=19%, signal=35%
GO_PYRIMIDINE_NUCLEOSIDE_MONOPHOSPHATE_METABOLIC_PROCESS	GO_PYRIMIDINE_NUCLEOSIDE_MONOPHOSPHATE_METABOLIC_PROCESS		16	0.212614	0.684277	0.895735	0.986842	1	775	tags=13%, list=4%, signal=13%
GO_TRIGLYCERIDE_CATABOLIC_PROCESS	GO_TRIGLYCERIDE_CATABOLIC_PROCESS		33	0.177151	0.732065	0.895833	0.97929	1	16317	tags=100%, list=82%, signal=564%
GO_SULFATE_TRANSPORT	GO_SULFATE_TRANSPORT		15	0.216057	0.71114	0.897436	0.981779	1	4069	tags=33%, list=21%, signal=42%
GO_ACTIN_MONOMER_BINDING	GO_ACTIN_MONOMER_BINDING		24	0.181364	0.698951	0.898396	0.984896	1	16232	tags=100%, list=82%, signal=551%
GO_SIALYLTRANSFERASE_ACTIVITY	GO_SIALYLTRANSFERASE_ACTIVITY		20	0.205018	0.71335	0.9	0.980742	1	2135	tags=20%, list=11%, signal=22%
GO_REGULATION_OF_NECROTIC_CELL_DEATH	GO_REGULATION_OF_NECROTIC_CELL_DEATH		22	0.195587	0.70014	0.9	0.98741	1	1513	tags=14%, list=8%, signal=15%
GO_CHOLESTEROL_STORAGE	GO_CHOLESTEROL_STORAGE		17	0.210895	0.693476	0.900901	0.986189	1	4064	tags=35%, list=21%, signal=44%
GO_NEURON_FATE_SPECIFICATION	GO_NEURON_FATE_SPECIFICATION		34	0.184194	0.740673	0.903614	0.977907	1	2521	tags=18%, list=13%, signal=20%
GO_SPINAL_CORD_PATTERNING	GO_SPINAL_CORD_PATTERNING		25	0.192284	0.69911	0.905882	0.985918	1	3718	tags=28%, list=19%, signal=34%
GO_URONIC_ACID_METABOLIC_PROCESS	GO_URONIC_ACID_METABOLIC_PROCESS		17	0.203485	0.659331	0.906977	0.992596	1	3022	tags=24%, list=15%, signal=28%
GO_THYROID_HORMONE_GENERATION	GO_THYROID_HORMONE_GENERATION		19	0.198435	0.683911	0.908602	0.985974	1	15893	tags=100%, list=80%, signal=504%
GO_SYNAPSE_ASSEMBLY	GO_SYNAPSE_ASSEMBLY		169	0.157671	0.851674	0.909091	0.888575	1	2439	tags=17%, list=12%, signal=19%
GO_POSITIVE_REGULATION_OF_PHOSPHOLIPID_METABOLIC_PROCESS	GO_POSITIVE_REGULATION_OF_PHOSPHOLIPID_METABOLIC_PROCESS		47	0.174774	0.777479	0.911765	0.94438	1	2605	tags=19%, list=13%, signal=22%
GO_BRUSH_BORDER	GO_BRUSH_BORDER		100	0.161157	0.792075	0.914286	0.936358	1	2651	tags=18%, list=13%, signal=21%
GO_PHOSPHATIDYLGLYCEROL_ACYL_CHAIN_REMODELING	GO_PHOSPHATIDYLGLYCEROL_ACYL_CHAIN_REMODELING		17	0.198695	0.676231	0.917749	0.989209	1	2282	tags=18%, list=12%, signal=20%
GO_FAD_BINDING	GO_FAD_BINDING		31	0.177465	0.702886	0.918239	0.988479	1	3787	tags=35%, list=19%, signal=44%
GO_NEUROMUSCULAR_PROCESS_CONTROLLING_POSTURE	GO_NEUROMUSCULAR_PROCESS_CONTROLLING_POSTURE		17	0.194722	0.672297	0.918919	0.9897	1	2139	tags=18%, list=11%, signal=20%
GO_PIGMENT_CELL_DIFFERENTIATION	GO_PIGMENT_CELL_DIFFERENTIATION		35	0.179749	0.732572	0.92	0.979923	1	3765	tags=31%, list=19%, signal=39%
GO_INTESTINAL_ABSORPTION	GO_INTESTINAL_ABSORPTION		38	0.172186	0.723619	0.923729	0.982336	1	3047	tags=21%, list=15%, signal=25%
GO_WNT_ACTIVATED_RECEPTOR_ACTIVITY	GO_WNT_ACTIVATED_RECEPTOR_ACTIVITY		18	0.197339	0.680674	0.923858	0.987231	1	1024	tags=11%, list=5%, signal=12%
GO_POSITIVE_REGULATION_OF_CALCIUM_ION_DEPENDENT_EXOCYTOSIS	GO_POSITIVE_REGULATION_OF_CALCIUM_ION_DEPENDENT_EXOCYTOSIS		18	0.180792	0.631887	0.924528	0.996386	1	3694	tags=33%, list=19%, signal=41%
GO_DISULFIDE_OXIDOREDUCTASE_ACTIVITY	GO_DISULFIDE_OXIDOREDUCTASE_ACTIVITY		36	0.186674	0.77276	0.924658	0.950199	1	2743	tags=19%, list=14%, signal=23%
GO_AMPA_GLUTAMATE_RECEPTOR_COMPLEX	GO_AMPA_GLUTAMATE_RECEPTOR_COMPLEX		26	0.171071	0.664701	0.924856	0.99368	1	2898	tags=27%, list=15%, signal=31%
GO_BARBED_END_ACTIN_FILAMENT_CAPPING	GO_BARBED_END_ACTIN_FILAMENT_CAPPING		15	0.191125	0.636813	0.926087	0.996207	1	16037	tags=100%, list=81%, signal=523%
GO_REGULATION_OF_MYOBLAST_DIFFERENTIATION	GO_REGULATION_OF_MYOBLAST_DIFFERENTIATION		53	0.15613	0.696186	0.926829	0.986188	1	3474	tags=23%, list=18%, signal=27%
GO_MECHANORECEPTOR_DIFFERENTIATION	GO_MECHANORECEPTOR_DIFFERENTIATION		57	0.168492	0.757673	0.927835	0.964056	1	1711	tags=14%, list=9%, signal=15%
GO_NEGATIVE_REGULATION_OF_HEART_CONTRACTION	GO_NEGATIVE_REGULATION_OF_HEART_CONTRACTION		21	0.185215	0.653551	0.929293	0.99385	1	732	tags=10%, list=4%, signal=10%
GO_NEGATIVE_REGULATION_OF_PROTEIN_POLYMERIZATION	GO_NEGATIVE_REGULATION_OF_PROTEIN_POLYMERIZATION		64	0.157462	0.718415	0.933333	0.979264	1	1451	tags=11%, list=7%, signal=12%
GO_REGULATION_OF_T_CELL_CYTOKINE_PRODUCTION	GO_REGULATION_OF_T_CELL_CYTOKINE_PRODUCTION		31	0.174373	0.701435	0.940741	0.988626	1	1732	tags=13%, list=9%, signal=14%
GO_LEUKOTRIENE_METABOLIC_PROCESS	GO_LEUKOTRIENE_METABOLIC_PROCESS		29	0.163918	0.643185	0.942446	0.996365	1	4156	tags=34%, list=21%, signal=44%
GO_REGULATION_OF_FERTILIZATION	GO_REGULATION_OF_FERTILIZATION		26	0.180725	0.684953	0.942857	0.987494	1	16245	tags=100%, list=82%, signal=553%
GO_INTESTINAL_LIPID_ABSORPTION	GO_INTESTINAL_LIPID_ABSORPTION		17	0.177738	0.602547	0.944444	0.998182	1	3047	tags=24%, list=15%, signal=28%
GO_FEAR_RESPONSE	GO_FEAR_RESPONSE		39	0.168185	0.730452	0.946429	0.978702	1	3978	tags=26%, list=20%, signal=32%
GO_CELLULAR_RESPONSE_TO_LOW_DENSITY_LIPOPROTEIN_PARTICLE_STIMULUS	GO_CELLULAR_RESPONSE_TO_LOW_DENSITY_LIPOPROTEIN_PARTICLE_STIMULUS		18	0.191873	0.647455	0.947619	0.995106	1	3271	tags=22%, list=17%, signal=27%
GO_REGULATION_OF_RESPIRATORY_GASEOUS_EXCHANGE	GO_REGULATION_OF_RESPIRATORY_GASEOUS_EXCHANGE		22	0.172071	0.621693	0.950549	0.997558	1	4029	tags=32%, list=20%, signal=40%
GO_MYOSIN_COMPLEX	GO_MYOSIN_COMPLEX		55	0.145037	0.661571	0.951456	0.993451	1	4407	tags=33%, list=22%, signal=42%
GO_FILOPODIUM_MEMBRANE	GO_FILOPODIUM_MEMBRANE		18	0.189162	0.65112	0.953917	0.99413	1	3246	tags=28%, list=16%, signal=33%
GO_POSITIVE_REGULATION_OF_BMP_SIGNALING_PATHWAY	GO_POSITIVE_REGULATION_OF_BMP_SIGNALING_PATHWAY		32	0.169246	0.685935	0.957746	0.989054	1	3330	tags=25%, list=17%, signal=30%
GO_INTERLEUKIN_13_PRODUCTION	GO_INTERLEUKIN_13_PRODUCTION		24	0.174849	0.659477	0.958333	0.993639	1	16361	tags=100%, list=83%, signal=572%
GO_PEPTIDE_ANTIGEN_BINDING	GO_PEPTIDE_ANTIGEN_BINDING		19	0.17296	0.597458	0.962085	0.99884	1	2957	tags=21%, list=15%, signal=25%
GO_NUCLEOTIDE_RECEPTOR_ACTIVITY	GO_NUCLEOTIDE_RECEPTOR_ACTIVITY		20	0.17249	0.617479	0.962963	0.998198	1	16407	tags=100%, list=83%, signal=580%
GO_NEGATIVE_REGULATION_OF_INTERLEUKIN_1_PRODUCTION	GO_NEGATIVE_REGULATION_OF_INTERLEUKIN_1_PRODUCTION		29	0.175308	0.674789	0.963235	0.989125	1	2926	tags=21%, list=15%, signal=24%
GO_POSITIVE_REGULATION_OF_LIPID_STORAGE	GO_POSITIVE_REGULATION_OF_LIPID_STORAGE		22	0.172306	0.637651	0.963351	0.996945	1	16411	tags=100%, list=83%, signal=580%
GO_HYDROLASE_ACTIVITY_HYDROLYZING_O_GLYCOSYL_COMPOUNDS	GO_HYDROLASE_ACTIVITY_HYDROLYZING_O_GLYCOSYL_COMPOUNDS		85	0.161904	0.778273	0.964286	0.945581	1	2950	tags=21%, list=15%, signal=25%
GO_REGULATION_OF_MACROPHAGE_MIGRATION	GO_REGULATION_OF_MACROPHAGE_MIGRATION		37	0.167091	0.685083	0.965278	0.988553	1	2690	tags=19%, list=14%, signal=22%
GO_FILOPODIUM_TIP	GO_FILOPODIUM_TIP		17	0.175291	0.597366	0.968037	0.997742	1	16351	tags=100%, list=82%, signal=570%
GO_POLE_PLASM	GO_POLE_PLASM		19	0.176961	0.612591	0.968421	0.997818	1	1400	tags=11%, list=7%, signal=11%
GO_NEGATIVE_REGULATION_OF_CD4_POSITIVE_ALPHA_BETA_T_CELL_ACTIVATION	GO_NEGATIVE_REGULATION_OF_CD4_POSITIVE_ALPHA_BETA_T_CELL_ACTIVATION		27	0.159941	0.630323	0.968553	0.994893	1	2176	tags=15%, list=11%, signal=17%
GO_POSITIVE_REGULATION_OF_T_CELL_CYTOKINE_PRODUCTION	GO_POSITIVE_REGULATION_OF_T_CELL_CYTOKINE_PRODUCTION		19	0.162715	0.570783	0.968912	1	1	2577	tags=16%, list=13%, signal=18%
GO_GROOMING_BEHAVIOR	GO_GROOMING_BEHAVIOR		19	0.181044	0.630549	0.971292	0.995926	1	3154	tags=26%, list=16%, signal=31%
GO_NEGATIVE_REGULATION_OF_NEURAL_PRECURSOR_CELL_PROLIFERATION	GO_NEGATIVE_REGULATION_OF_NEURAL_PRECURSOR_CELL_PROLIFERATION		21	0.170223	0.604172	0.971429	0.999876	1	2503	tags=19%, list=13%, signal=22%
GO_NEGATIVE_REGULATION_OF_ALPHA_BETA_T_CELL_ACTIVATION	GO_NEGATIVE_REGULATION_OF_ALPHA_BETA_T_CELL_ACTIVATION		36	0.158102	0.641675	0.977099	0.995969	1	2521	tags=17%, list=13%, signal=19%
GO_PHAGOCYTOSIS_RECOGNITION	GO_PHAGOCYTOSIS_RECOGNITION		15	0.179009	0.593402	0.977974	0.997928	1	16277	tags=100%, list=82%, signal=558%
GO_POSITIVE_REGULATION_OF_ANION_TRANSPORT	GO_POSITIVE_REGULATION_OF_ANION_TRANSPORT		48	0.144897	0.632807	0.978022	0.997106	1	4174	tags=27%, list=21%, signal=34%
GO_NEGATIVE_REGULATION_OF_SYSTEMIC_ARTERIAL_BLOOD_PRESSURE	GO_NEGATIVE_REGULATION_OF_SYSTEMIC_ARTERIAL_BLOOD_PRESSURE		19	0.155125	0.55011	0.978142	1	1	2989	tags=21%, list=15%, signal=25%
GO_STEROID_DEHYDROGENASE_ACTIVITY	GO_STEROID_DEHYDROGENASE_ACTIVITY		33	0.162486	0.654596	0.979021	0.994405	1	3580	tags=21%, list=18%, signal=26%
GO_POTASSIUM_ION_ANTIPORTER_ACTIVITY	GO_POTASSIUM_ION_ANTIPORTER_ACTIVITY		16	0.168076	0.558808	0.979798	1	1	12752	tags=94%, list=64%, signal=263%
GO_DOPAMINE_TRANSPORT	GO_DOPAMINE_TRANSPORT		49	0.147359	0.686651	0.980583	0.989624	1	964	tags=8%, list=5%, signal=9%
GO_OLIGOSACCHARIDE_METABOLIC_PROCESS	GO_OLIGOSACCHARIDE_METABOLIC_PROCESS		48	0.162179	0.691484	0.982301	0.986673	1	3197	tags=21%, list=16%, signal=25%
GO_SCHAFFER_COLLATERAL_CA1_SYNAPSE	GO_SCHAFFER_COLLATERAL_CA1_SYNAPSE		83	0.148827	0.719298	0.982759	0.979559	1	1738	tags=11%, list=9%, signal=12%
GO_MANNOSE_BINDING	GO_MANNOSE_BINDING		19	0.154456	0.557331	0.982955	1	1	16764	tags=100%, list=85%, signal=647%
GO_NEUTRAL_LIPID_CATABOLIC_PROCESS	GO_NEUTRAL_LIPID_CATABOLIC_PROCESS		41	0.146315	0.614021	0.983871	0.998404	1	3099	tags=20%, list=16%, signal=23%
GO_MITOCHONDRIAL_DEPOLARIZATION	GO_MITOCHONDRIAL_DEPOLARIZATION		22	0.158861	0.582577	0.984375	0.999997	1	2373	tags=18%, list=12%, signal=21%
GO_REGULATION_OF_BEHAVIOR	GO_REGULATION_OF_BEHAVIOR		68	0.160395	0.740184	0.985507	0.977325	1	2982	tags=18%, list=15%, signal=21%
GO_TUMOR_NECROSIS_FACTOR_RECEPTOR_BINDING	GO_TUMOR_NECROSIS_FACTOR_RECEPTOR_BINDING		30	0.171715	0.662913	0.986487	0.993749	1	1772	tags=13%, list=9%, signal=15%
GO_MULTICELLULAR_ORGANISMAL_MOVEMENT	GO_MULTICELLULAR_ORGANISMAL_MOVEMENT		56	0.153202	0.695014	0.986842	0.985996	1	2367	tags=16%, list=12%, signal=18%
GO_SIGNAL_TRANSDUCTION_INVOLVED_IN_REGULATION_OF_GENE_EXPRESSION	GO_SIGNAL_TRANSDUCTION_INVOLVED_IN_REGULATION_OF_GENE_EXPRESSION		19	0.147135	0.514431	0.990385	1	1	16909	tags=100%, list=85%, signal=679%
GO_DELAYED_RECTIFIER_POTASSIUM_CHANNEL_ACTIVITY	GO_DELAYED_RECTIFIER_POTASSIUM_CHANNEL_ACTIVITY		31	0.143932	0.575983	0.993506	1	1	3920	tags=26%, list=20%, signal=32%
GO_CHEMOKINE_SECRETION	GO_CHEMOKINE_SECRETION		18	0.155475	0.533935	0.994898	1	1	1579	tags=11%, list=8%, signal=12%
GO_REGULATION_OF_PROTEIN_POLYMERIZATION	GO_REGULATION_OF_PROTEIN_POLYMERIZATION		200	0.185527	0.949146	1	0.778859	1	2056	tags=16%, list=10%, signal=17%
GO_CARBOHYDRATE_DERIVATIVE_CATABOLIC_PROCESS	GO_CARBOHYDRATE_DERIVATIVE_CATABOLIC_PROCESS		180	0.149943	0.814938	1	0.924734	1	3956	tags=27%, list=20%, signal=34%
GO_MULTICELLULAR_ORGANISMAL_RESPONSE_TO_STRESS	GO_MULTICELLULAR_ORGANISMAL_RESPONSE_TO_STRESS		74	0.150298	0.723812	1	0.983336	1	2989	tags=18%, list=15%, signal=21%
GO_REGULATION_OF_DOPAMINE_SECRETION	GO_REGULATION_OF_DOPAMINE_SECRETION		37	0.143441	0.603783	1	0.998893	1	2259	tags=14%, list=11%, signal=15%
GO_REGULATION_OF_LIPID_STORAGE	GO_REGULATION_OF_LIPID_STORAGE		44	0.125392	0.545124	1	1	1	3739	tags=20%, list=19%, signal=25%
GO_REGULATION_OF_ACUTE_INFLAMMATORY_RESPONSE	GO_REGULATION_OF_ACUTE_INFLAMMATORY_RESPONSE		42	0.123648	0.537833	1	1	1	3053	tags=19%, list=15%, signal=22%
GO_NEGATIVE_REGULATION_OF_MYOBLAST_DIFFERENTIATION	GO_NEGATIVE_REGULATION_OF_MYOBLAST_DIFFERENTIATION		25	0.138	0.510577	1	1	1	3474	tags=24%, list=18%, signal=29%
GO_REGULATION_OF_CILIUM_DEPENDENT_CELL_MOTILITY	GO_REGULATION_OF_CILIUM_DEPENDENT_CELL_MOTILITY		22	0.130037	0.469264	1	1	1	17248	tags=100%, list=87%, signal=769%
GO_RETINAL_GANGLION_CELL_AXON_GUIDANCE	GO_RETINAL_GANGLION_CELL_AXON_GUIDANCE		21	0.126862	0.462913	1	1	1	4926	tags=38%, list=25%, signal=51%
GO_OXIDOREDUCTASE_ACTIVITY_ACTING_ON_THE_CH_NH2_GROUP_OF_DONORS_OXYGEN_AS_ACCEPTOR	GO_OXIDOREDUCTASE_ACTIVITY_ACTING_ON_THE_CH_NH2_GROUP_OF_DONORS_OXYGEN_AS_ACCEPTOR		15	0.141899	0.458682	1	1	1	3929	tags=27%, list=20%, signal=33%
GO_CILIUM_MOVEMENT_INVOLVED_IN_CELL_MOTILITY	GO_CILIUM_MOVEMENT_INVOLVED_IN_CELL_MOTILITY		20	0.115568	0.399095	1	0.99992	1	4557	tags=30%, list=23%, signal=39%
GO_ACTIN_BINDING	GO_ACTIN_BINDING		411	0.18874			1	0	2120	tags=17%, list=11%, signal=19%
GO_PROTEIN_SERINE_THREONINE_KINASE_ACTIVITY	GO_PROTEIN_SERINE_THREONINE_KINASE_ACTIVITY		417	0.205393			1	0	3015	tags=26%, list=15%, signal=30%
